# Supplementary material
Source: publisher figshare collection journal article supplement (https://acs.figshare.com/ndownloader/files/14632835)
Supplement: Supplementary file 1 [file 14632835]

## Supporting Information

# **Enantioselective Epoxidation of $\beta,\beta$ -Disubstituted Enamides with a Manganese Catalyst and Aqueous Hydrogen Peroxide**

*Carlota Clarasó, Laia Vicens, Alfonso Polo\* and Miquel Costas\**

## Table of Contents

|                                                                                               |      |
|-----------------------------------------------------------------------------------------------|------|
| 1) Experimental Section .....                                                                 | S3   |
| 1.1) Materials .....                                                                          | S3   |
| 1.2) Instrumentation .....                                                                    | S3   |
| 2) Synthesis of substrates .....                                                              | S4   |
| 2.1) General procedure A for the synthesis of $\alpha,\beta$ -unsaturated esters.....         | S4   |
| 2.2) General procedure B for the synthesis of $\alpha,\beta$ -unsaturated acids.....          | S7   |
| 2.3) General procedures C and D for the synthesis of $\alpha,\beta$ -unsaturated amides ..... | S10  |
| 3) Synthesis of complexes .....                                                               | S21  |
| 3.1) Synthesis of the Ohq backbone .....                                                      | S21  |
| 3.2) Synthesis of pyridine synthons .....                                                     | S21  |
| 3.3) Synthesis and characterization of $^{Me2N}Ohq$ .....                                     | S21  |
| 3.4) Synthesis and characterization of $^{Me2N}Ohq-Mn$ .....                                  | S24  |
| 3.5) Synthesis of $^{Me2N}Ohq-Fe$ .....                                                       | S25  |
| 4) Catalytic studies .....                                                                    | S27  |
| 4.1) Reaction conditions (Table 1) .....                                                      | S27  |
| 4.2) Optimization of epoxidation of S1 .....                                                  | S28  |
| 4.3) Reaction conditions (Tables 2 and 3) .....                                               | S28  |
| 4.4) General procedure for epoxide isolation (Tables 2 and 3) .....                           | S29  |
| 5) Characterization of isolated epoxide products.....                                         | S29  |
| 6) Substrates and products characterization .....                                             | S36  |
| 6.1) $^1H$ and $^{13}C$ -NMR spectra of synthesized substrates .....                          | S36  |
| 6.2) $^1H$ and $^{13}C$ -NMR spectra of isolated products.....                                | S59  |
| 6.3) HPLC of products.....                                                                    | S81  |
| 7) References.....                                                                            | S111 |

## 1) Experimental Section

### 1.1) Materials

Reagents and solvents used were of commercially available reagent quality unless stated otherwise. Solvents were purchased from SDS and Scharlab. Solvents were purified and dried by passing through an activated alumina purification system (MBraun SPS-800). HPLC quality acetonitrile was employed in epoxidation reactions.

### 1.2) Instrumentation

IR spectra were taken in a Mattson-Galaxy Satellite FT-IR spectrophotometer using a MKII Golden Gate single reflection ATR system. NMR spectra were taken on a Bruker Ultrashield DPX300 MHz or Bruker Ultrashield AVANCE III400 spectrometer using standard conditions. Elemental analyses of C, H, and N were performed using a CHNS-O EA-2400 elemental analyser from Perkin Helmer. High resolution mass spectra (HRMS) were recorded on a Bruker MicroTOF-QII instrument with an ESI source and a quadrupole analyser at Serveis Tècnics of the University of Girona. Samples were introduced into the mass spectrometer ion source by direct infusion through a syringe pump and were externally calibrated using sodium formate. The X-Ray measurement of **(S,S)-<sup>Me2N</sup>Ohq-Mn** was carried out on a BRUKER SMART APEX CCD diffractometer using graphite-monochromated Mo K $\alpha$  radiation ( $\lambda = 0.71 \text{ \AA}$ ). Oxidation products were identified by  $^1\text{H}$  and  $^{13}\text{C}$ -NMR analyses. Chromatographic resolution of enantiomers was performed on HPLC 1200 series Agilent technologies using CHIRALPAK-IA and CHIRALPAK-IC columns using crude reaction mixtures to avoid possible enantiomeric enrichment during purification. Racemic epoxides have been prepared using standard epoxidation conditions using mCPBA,<sup>1</sup>  $[\text{Mn}(\text{OTf})_2(\text{H}^{\text{Me}}\text{PyTACN})]^2$  or the racemic version of the catalyst **<sup>Me2N</sup>Ohq-Mn**.

The absolute configuration of the major enantiomer of the epoxide resulting from epoxidation of **S6** with **(S,S)-<sup>Me2N</sup>Ohq-Mn** (Table 2, Entry 4) was determined by single-crystal X-Ray diffraction. The X-Ray measurement was carried out on an AGILENT SUPERNOVA diffractometer equipped with an Atlas CCD detector using graphite-monochromate Cu K $\alpha$  radiation ( $\lambda = 1.54 \text{ \AA}$ ) from an X-Ray tube.

## 2) Synthesis of substrates

A literature procedure was used to prepare **S1**.<sup>3</sup>

### 2.1) General procedure A for the synthesis of $\alpha,\beta$ -unsaturated esters

A literature procedure was used to prepare  $\alpha,\beta$ -unsaturated esters.<sup>4</sup>

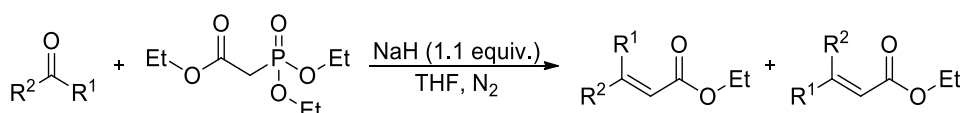

To a suspension of NaH (480 mg, 60% in mineral oil, 12 mmol) in THF (10 mL), a solution of triethyl phosphonoacetate (2.5 mL, 12 mmol) in THF (5 mL) was slowly added. The mixture was stirred at room temperature for 30 min. Then, ketone (10 mmol) in THF (5 mL) was added at 0 °C, and the mixture was stirred at room temperature. After confirmation of consumption of ketone by TLC, a solution of saturated aqueous sodium bicarbonate (15 mL) was added. The mixture was extracted with EtOAc (3 x 25 mL), washed with brine (15 mL) and dried over Mg<sub>2</sub>SO<sub>4</sub>. After concentration of the organic phase, the residue was purified by silica-gel column chromatography (hexane/EtOAc as eluent) to give (E)-ester and/or (Z)-ester.

#### (E)-ethyl 3-phenylbut-2-enoate (**S2**)

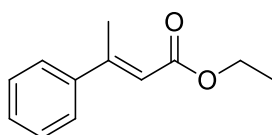

Prepared according to General Procedure A. Hexane/EtOAc 9:1, 80% yield. Spectral data match those previously reported.<sup>5</sup>

#### Ethyl 3-phenylpent-2-enoate

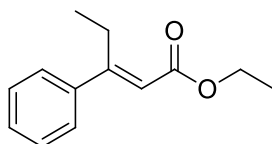

Prepared according to General Procedure A. Hexane/EtOAc 98:2, a 51% yield of **E**, 21% yield of **Z**. Spectral data match those previously reported.<sup>5</sup>

#### (E)-ethyl 4-methyl-3-phenylpent-2-enoate

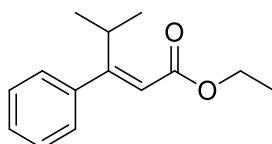

Prepared according to General Procedure A. Hexane/EtOAc 95:5, 28% yield. Spectral data match those previously reported.<sup>6</sup>

**(E)-ethyl 2-(3,4-dihydronaphthalen-1(2H)-ylidene)acetate**

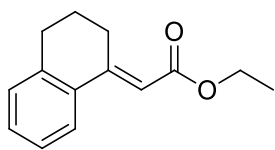

Prepared according to General Procedure A. Hexane/EtOAc 9:1, 7% yield. Spectral data match those previously reported.<sup>7</sup>

**(E)-Ethyl 3-(o-tolyl)but-2-enoate**

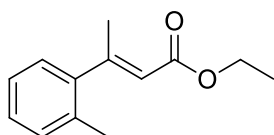

Prepared according to General Procedure A. Hexane/EtOAc 95:5, 51% yield. Spectral data match those previously reported.<sup>8</sup>

**(E)-ethyl 3-(m-tolyl)but-2-enoate**

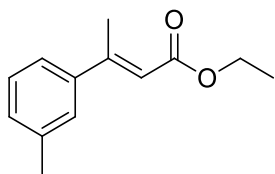

Prepared according to General Procedure A. Hexane/EtOAc 95:5, 84% yield. Spectral data match those previously reported.<sup>8</sup>

**(E)-ethyl 3-(p-tolyl)but-2-enoate**

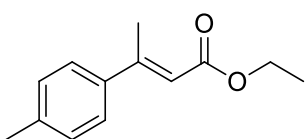

Prepared according to General Procedure A. Hexane/EtOAc 95:5, 73% yield. Spectral data match those previously reported.<sup>5</sup>

**(E)-ethyl 3-(4-(trifluoromethyl)phenyl)but-2-enoate**

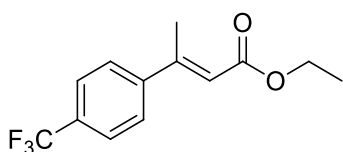

Prepared according to General Procedure A. Hexane/EtOAc 95:5, 73% yield. Spectral data match those previously reported.<sup>5</sup>

**(E)-ethyl 3-(4-methoxyphenyl)but-2-enoate**

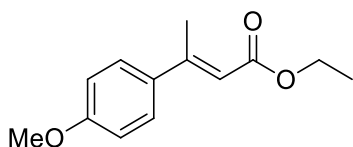

Prepared according to General Procedure A. Hexane/EtOAc 9:1, 77% yield. Spectral data match those previously reported.<sup>9</sup>

**(E)-ethyl 3-(4-chlorophenyl)but-2-enoate**

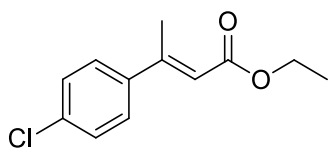

Prepared according to General Procedure A. Hexane/EtOAc 9:1, 77% yield. Spectral data match those previously reported.<sup>5</sup>

**(E)-ethyl 3-(naphthalen-2-yl)but-2-enoate**

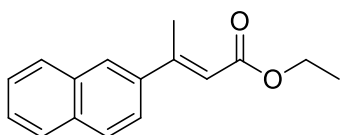

Prepared according to General Procedure A. Hexane/EtOAc 98:02, 73% yield. Spectral data match those previously reported.<sup>5</sup>

**(E)-ethyl 3-cyclohexylbut-2-enoate**

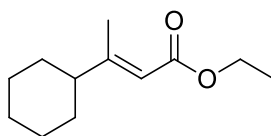

Prepared according to General Procedure A. Hexane/EtOAc 100:0-99:0.1, 67% yield. Spectral data match those previously reported.<sup>10</sup>

**Ethyl 3,6-dimethylhept-2-enoate**

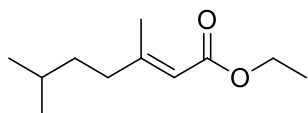

Prepared according to General Procedure A, an inseparable mixture of E and Z isomers was obtained. Hexane/EtOAc 9:1, 70% yield, E:Z 81:19. Spectral data match those previously reported.<sup>11</sup>

**(E)-ethyl 3-methyl-4-phenylbut-2-enoate**

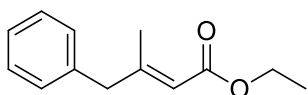

Prepared according to General Procedure A. Hexane/EtOAc 9:1, 63% yield. Spectral data match those previously reported.<sup>12</sup>

## 2.2) General procedure B for the synthesis of $\alpha,\beta$ -unsaturated acids

A slightly modified literature procedure was used to prepare  $\alpha,\beta$ -unsaturated acids.<sup>13</sup>

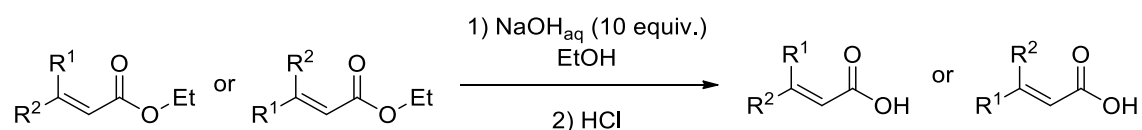

The  $\alpha,\beta$ -unsaturated ester was placed in a 50 mL round-bottom flask, then  $\text{EtOH}$  (0.5M) was added, the reaction mixture was stirred, and  $\text{NaOH}$  (10%, 10 equiv.) was added. The reaction mixture was stirred at room temperature or at reflux until no starting material was detected by TLC. Then the pH was adjusted to 1.0 with  $\text{HCl}$  (1 M). The mixture was extracted with diethyl ether. The combined organic layer was washed with saturated  $\text{NaCl}_{\text{aq}}$  solution, dried over  $\text{MgSO}_4$ , and concentrated in vacuum. If needed, the crude residue was subjected to flash chromatography (hexane/ $\text{EtOAc}$ ) to afford the corresponding  $\alpha,\beta$ -unsaturated acid.

### (*E*)-3-phenylbut-2-enoic acid

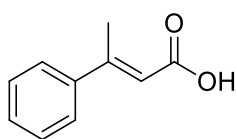

Prepared according to General Procedure B. Hexane/ $\text{EtOAc}$  5:1, 90% yield. Spectral data match those previously reported.<sup>13</sup>

### 3-phenylpent-2-enoic acid

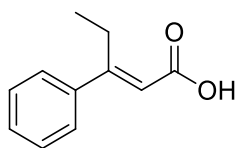

Prepared according to General Procedure B. No further purification is needed for **E**, 72% yield **E**. Hexane/ $\text{EtOAc}$  5:2 for **Z**, 90% yield **Z**. Spectral data match those previously reported.<sup>13</sup>

### (*E*)-4-methyl-3-phenylpent-2-enoic acid

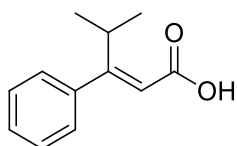

Prepared according to General Procedure B. No further purification is needed, 98% yield. Spectral data match those previously reported.<sup>13</sup>

**(E)-2-(3,4-dihydronaphthalen-1(2H)-ylidene)acetic acid**

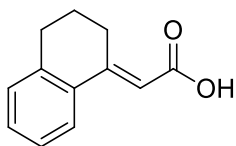

Prepared according to General Procedure B. No further purification is needed, 96% yield. Spectral data match those previously reported.<sup>7</sup>

**(E)-3-(o-tolyl)but-2-enoic acid**

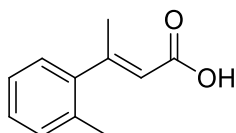

Prepared according to General Procedure B. No further purification is needed, 94% yield. Spectral data match those previously reported.<sup>13</sup>

**(E)-3-(m-tolyl)but-2-enoic acid**

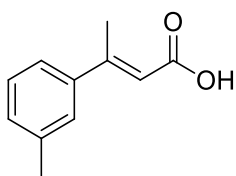

Prepared according to General Procedure B, 95% yield. No further purification is needed, 95% yield. <sup>1</sup>H-NMR (400 MHz, CDCl<sub>3</sub>) δ ppm: 7.35-7.27 (m, 3H), 7.20 (d, J = 6.1 Hz, 1H), 6.17 (s, 1H), 2.60 (s, 3H), 2.39 (s, 3H). <sup>13</sup>C-NMR (101 MHz, CDCl<sub>3</sub>) δ ppm: 172.2, 158.8, 142.1, 138.2, 130.1, 128.5, 127.1, 123.6, 116.2, 21.5, 18.4. HRMS (ESI-MS) m/z calculated for C<sub>11</sub>H<sub>11</sub>O<sub>2</sub> [M-H]<sup>-</sup>: 175.0754, found: 175.0747.

**(E)-3-(p-tolyl)but-2-enoic acid**

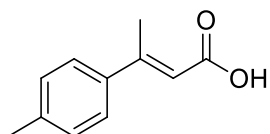

Prepared according to General Procedure B. No further purification is needed, 99% yield. Spectral data match those previously reported.<sup>14</sup>

**(E)-3-(4-(trifluoromethyl)phenyl)but-2-enoic acid**

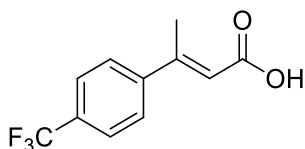

Prepared according to General Procedure B. No further purification is needed, 96% yield. Spectral data match those previously reported.<sup>14</sup>

**(E)-3-(4-methoxyphenyl)but-2-enoic acid**

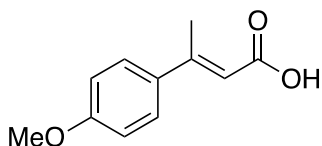

Prepared according to General Procedure B. No further purification is needed, 95% yield. Spectral data match those previously reported.<sup>15</sup>

### **(E)-3-(4-chlorophenyl)but-2-enoic acid**

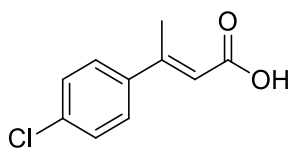

Prepared according to General Procedure B. No further purification is needed, 98% yield. Spectral data match those previously reported.<sup>13</sup>

### **(E)-3-(naphthalen-2-yl)but-2-enoic acid**

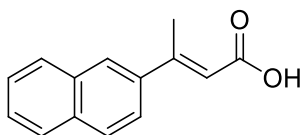

Prepared according to General Procedure B. No further purification is needed, 94% yield. Spectral data match those previously reported.<sup>14</sup>

### **(E)-3-cyclohexylbut-2-enoic acid**

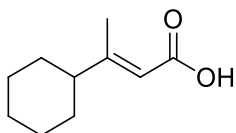

Prepared according to General Procedure B. No further purification is needed, 90% yield. Spectral data match those previously reported.<sup>13</sup>

### **3,6-Dimethylhept-2-enoic acid**

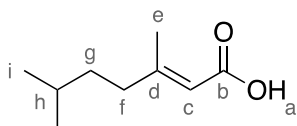

Prepared according to General Procedure B, an inseparable mixture of *E* and *Z* isomers (**E:Z** 87:13) was obtained as a white solid. Hexane/EtOAc 9:1-8:2, 86% yield. <sup>1</sup>H-NMR (400 MHz,

CDCl<sub>3</sub>)  $\delta$  ppm: 12.19 (s, H<sub>a</sub> *E* and *Z* isomers), 5.69 (q, *J* = 1.1 Hz, H<sub>c</sub> *E* isomer), 5.65 (d, *J* = 1.2 Hz, H<sub>c</sub> *Z* isomer), 2.68-2.55 (m, H<sub>f</sub> *Z* isomer), 2.23-2.08 (m, H<sub>e</sub> and H<sub>f</sub> *E* isomer), 1.90 (d, *J* = 1.4 Hz, H<sub>e</sub> *Z* isomer), 1.62-1.48 (m, H<sub>h</sub> *E* and *Z* isomers), 1.41-1.29 (m, H<sub>g</sub> *E* and *Z* isomers), 0.90 (m, H<sub>i</sub> *E* and *Z* isomers). <sup>13</sup>C-NMR (101 MHz, CDCl<sub>3</sub>)  $\delta$  ppm: 172.7 (C<sub>b</sub> *E* isomer), 172.2 (C<sub>b</sub> *Z* isomer), 164.5 (C<sub>d</sub> *Z* isomer), 163.8 (C<sub>d</sub> *E* isomer), 115.4 (C<sub>c</sub> *Z* isomer), 115.0 (C<sub>c</sub> *E* isomer), 39.2 (C<sub>f</sub> *E* isomer), 37.3 (C<sub>g</sub> *Z* isomer), 36.6 (C<sub>g</sub> *E* isomer), 31.7 (C<sub>f</sub> *Z* isomer), 28.4 (C<sub>h</sub> *Z* isomer), 27.7 (C<sub>h</sub> *E* isomer), 25.5 (C<sub>e</sub> *E* isomer), 22.4 (H<sub>i</sub> *E* and *Z* isomers), 19.1 (H<sub>e</sub> *E* isomer). HRMS (ESI-MS) *m/z* calculated for C<sub>9</sub>H<sub>15</sub>O<sub>2</sub> [M-H]<sup>-</sup>: 155.1067, found: 155.1060.

### **(E)-3-methyl-4-phenylbut-2-enoic acid**

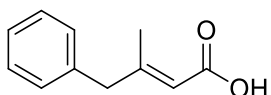

Prepared according to General Procedure B. Hexane/EtOAc 2:1, 31% yield. Spectral data match those previously reported.<sup>16</sup>

## 2.3) General procedures C and D for the synthesis of $\alpha,\beta$ -unsaturated amides

### Procedure C

A slightly modified literature procedure was used to prepare **S4-S6**, **S8-S12** and **S14-S27**  $\alpha,\beta$ -unsaturated amides.<sup>17</sup>

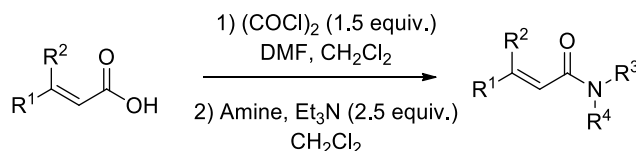

To a suspension of the indicated acid (1.0 equiv.) in dichloromethane (0.3 M) was added DMF (0.1 mL/mmol). At ambient temperature, oxalyl chloride (1.5 equiv.) was added dropwise over a period of 0.5 h, forming a homogenous solution. The resulting solution was kept at room temperature for 3 h. Then the solvent was removed under reduced pressure. The residue was dissolved in dry dichloromethane and slowly added dropwise to a solution of the appropriate amine (1.0 equiv.) and  $\text{Et}_3\text{N}$  (2.5 equiv.) in dichloromethane (0.25 M). The reaction mixture was maintained at room temperature and the progress of the reaction was monitored by TLC. Upon completion, the mixture was extracted with  $\text{CH}_2\text{Cl}_2$  ( $3 \times 50$  mL) and the combined organic phase was washed with  $\text{NH}_4\text{Cl}$  ( $1 \times 80$  mL) and brine ( $1 \times 80$  mL), dried over anhydrous  $\text{MgSO}_4$ . The solvent was evaporated under reduced pressure and the crude residue was purified by flash column chromatography on silica gel (hexane/ $\text{EtOAc}/\text{CH}_2\text{Cl}_2$ ) afforded the desired amides.

### Procedure D

A literature procedure was used to prepare **S3**, **S7** and **S13**  $\alpha,\beta$ -unsaturated amides.<sup>18</sup>

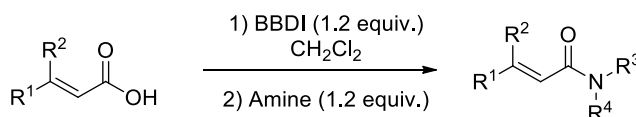

A mixture of the indicated acid (1.0 equiv.) and BBDI (1.2 equiv.) in  $\text{CH}_2\text{Cl}_2$  (0.4 M) was stirred at room temperature for 30 min. After addition of the corresponding amine (1.2 equiv.) to the mixture, the whole was refluxed 5h. Ethyl acetate (40 mL) was added to the reaction mixture and then the whole was washed with 5% HCl solution ( $2 \times 10$  mL)

and brine (10 mL), dried over  $\text{MgSO}_4$ , and concentrated under reduced pressure. The residue was purified by flash column chromatography on silica gel.

#### **(E)-N,N-dimethyl-3-phenylbut-2-enamide (S3)**

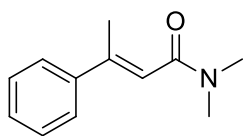

Prepared from **(E)-3-phenylbut-2-enoic acid** (200 mg, 1.23 mmol) and dimethylamine 2M in THF (738  $\mu\text{L}$ , 1.48 mmol) using the general procedure D that provided **S3** after purification by flash column chromatography (hexane/EtOAc 1:1) as a white solid (218.4 mg, 94% yield).  $^1\text{H}$ -NMR (400 MHz,  $\text{CDCl}_3$ )  $\delta$  ppm: 7.49-7.41 (m, 2H), 7.39-7.27 (m, 3H), 6.27 (d,  $J$  = 1.5 Hz, 1H), 3.05 (s, 3H), 3.02 (s, 3H), 2.28 (d,  $J$  = 1.2 Hz, 3H).  $^{13}\text{C}$ -NMR (101 MHz,  $\text{CDCl}_3$ )  $\delta$  ppm: 168.5, 145.6, 141.9, 128.4, 128.2, 126.0, 119.9, 37.8, 34.8, 17.9. HRMS (ESI-MS)  $m/z$  calculated for  $\text{C}_{12}\text{H}_{16}\text{NO}$   $[\text{M}+\text{H}]^+$ : 190.1226, found: 190.1226.

#### **(E)-N,N-diethyl-3-phenylbut-2-enamide (S4)**

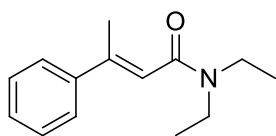

Prepared from **(E)-3-phenylbut-2-enoic acid** (200 mg, 1.23 mmol) and diethylamine (128  $\mu\text{L}$ , 1.23 mmol) using the general procedure C that provided **S4** after purification by flash column chromatography (hexane/EtOAc/ $\text{CH}_2\text{Cl}_2$  10:3:1) as an orange oil (194.9 mg, 73% yield). Spectral data match those previously reported.<sup>19</sup>

#### **(E)-N,N-diisopropyl-3-phenylbut-2-enamide (S5)**

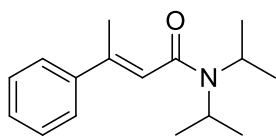

Prepared from **(E)-3-phenylbut-2-enoic acid** (200 mg, 1.23 mmol) and diisopropylamine (161  $\mu\text{L}$ , 1.23 mmol) using the general procedure C that provided **S5** after purification by flash column chromatography (hexane/EtOAc/ $\text{CH}_2\text{Cl}_2$  20:3:1) as a pale yellow oil (162.1 mg, 54% yield).  $^1\text{H}$ -NMR (400 MHz,  $\text{CDCl}_3$ )  $\delta$  ppm: 7.45 (dt,  $J$  = 8.4, 2.0 Hz, 2H), 7.38-7.27 (m, 3H), 6.26 (d,  $J$  = 1.1 Hz, 1H), 4.12 (hept,  $J$  = 6.5 Hz, 1H), 3.56 (hept,  $J$  = 5.9 Hz, 1H), 2.21 (s, 3H), 1.47 (d,  $J$  = 6.9 Hz, 6H), 1.17 (d,  $J$  = 6.8 Hz, 6H).  $^{13}\text{C}$ -NMR (100 MHz,  $\text{CDCl}_3$ )  $\delta$  ppm: 168.0, 141.9, 141.7, 128.4, 127.9, 125.8, 122.6, 49.7, 45.5, 21.1, 20.7, 17.6. HRMS (ESI-MS)  $m/z$  calculated for  $\text{C}_{16}\text{H}_{23}\text{NNaO}$   $[\text{M}+\text{Na}]^+$ : 268.1672, found: 268.1684.

**(E)-N,N-dibenzyl-3-phenylbut-2-enamide (S6)**

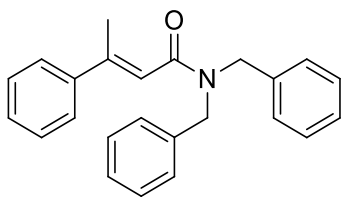

Prepared from **(E)-3-phenylbut-2-enoic acid** (940.7 mg, 5.8 mmol) and dibenzylamine (1.2 mL, 5.8 mmol) using the general procedure C that provided **S6** after purification by flash column chromatography (hexane/EtOAc/CH<sub>2</sub>Cl<sub>2</sub> 4:2:1) as a pale yellow solid (1.71 g, 86% yield). Spectral data match those previously reported.<sup>20</sup>

**(E)-3-phenyl-1-(piperidin-1-yl)but-2-en-1-one (S7)**

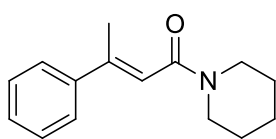

Prepared from **(E)-3-phenylbut-2-enoic acid** (474 mg, 2.92 mmol) and piperidine (343  $\mu$ L, 3.51 mmol) using the general procedure D that provided **S7** after purification by flash column chromatography (hexane/EtOAc 3:2) as an orange oil (596.8 mg, 89% yield). <sup>1</sup>H-NMR (400 MHz, CDCl<sub>3</sub>)  $\delta$  ppm:  $\delta$  7.50-7.39 (m, 2H), 7.39-7.24 (m, 3H), 6.26 (d, J = 1.3 Hz, 1H), 3.69-3.57 (m, 2H), 3.52-3.42 (m, 2H), 2.23 (d, J = 1.3 Hz, 3H), 1.71-1.47 (m, 6H). <sup>13</sup>C-NMR (100 MHz, CDCl<sub>3</sub>)  $\delta$  ppm: 167.1, 143.9, 141.6, 128.4, 128.1, 125.9, 120.4, 47.5, 42.3, 26.7, 25.7, 24.6, 17.8. HRMS (ESI-MS) m/z calculated for C<sub>15</sub>H<sub>20</sub>NO [M+H]<sup>+</sup>: 230.1539, found: 230.1544.

**(E)-N,N-diphenyl-3-phenylbut-2-enamide (S8)**

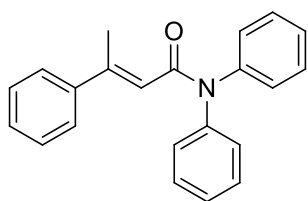

Prepared from **(E)-3-phenylbut-2-enoic acid** (200 mg, 1.23 mmol) and diphenylamine (252.3 mg, 1.48 mmol) using the general procedure C that provided **S8** after purification by flash column chromatography (hexane/EtOAc 9:1) as a brown solid (83.3 mg, 22% yield). <sup>1</sup>H-NMR (400 MHz, CDCl<sub>3</sub>)  $\delta$  ppm: 7.42-7.34 (m, 4H), 7.31-7.20 (m, 11H), 6.08 (s, 1H), 2.56 (s, 3H). <sup>13</sup>C-NMR (100 MHz, CDCl<sub>3</sub>)  $\delta$  ppm: 167.2, 150.9, 142.9, 142.7, 129.2, 128.4, 128.4, 126.2, 120.4, 18.1. HRMS (ESI-MS) m/z calculated for C<sub>22</sub>H<sub>20</sub>NO [M+H]<sup>+</sup>: 314.1539, found: 314.1554.

### **(E)-N-cyclohexyl-N,3-diphenylbut-2-enamide (S9)**

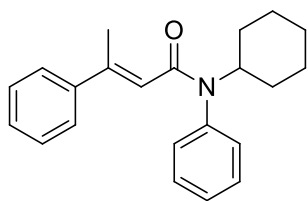

Prepared from **(E)-3-phenylbut-2-enoic acid** (400 mg, 2.46 mmol) and *N*-cyclohexylaniline (420.5 mg, 2.46 mmol) using the general procedure C that provided **S9** after purification by flash column chromatography (hexane/EtOAc/CH<sub>2</sub>Cl<sub>2</sub> 20:3:1)

as a waxy orange solid (114.9 mg, 15% yield). <sup>1</sup>H-NMR (400 MHz, CDCl<sub>3</sub>) δ ppm: 7.45-7.35 (m, 3H), 7.22-7.17 (m, 3H), 7.15-7.09 (m, 2H), 7.06-7.03 (m, 2H), 5.71 (d, *J* = 1.2 Hz, 1H), 4.68 (tt, *J* = 12.0, 3.4 Hz, 1H), 2.45 (d, *J* = 1.2 Hz, 3H), 1.94-1.85 (m, 2H), 1.81-1.71 (m, 2H), 1.59 (d, *J* = 13.0 Hz, 1H), 1.44 (qt, *J* = 13.2, 3.2 Hz, 2H), 1.12 (qd, *J* = 12.4, 3.3 Hz, 2H), 0.94 (qt, *J* = 13.1, 3.8 Hz, 1H). <sup>13</sup>C-NMR (100 MHz, CDCl<sub>3</sub>) δ ppm: 166.8, 147.9, 142.9, 139.4, 130.4, 129.0, 128.2, 128.1, 128.0, 126.0, 120.9, 53.9, 31.8, 25.9, 25.5, 18.0. HRMS (ESI-MS) *m/z* calculated for C<sub>22</sub>H<sub>26</sub>NO [M+H]<sup>+</sup>: 320.2009, found: 320.2018.

### **(E)-N-isopropyl-3-phenylbut-2-enamide (S10)**

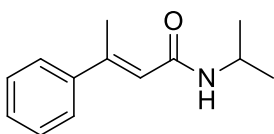

Prepared from **(E)-3-phenylbut-2-enoic acid** (200 mg, 1.23 mmol) and isopropylamine (106 μL, 1.23 mmol) using the general procedure C that provided **S10** after purification by flash column

chromatography (hexane/EtOAc/CH<sub>2</sub>Cl<sub>2</sub> 3:1:1) as a bright white solid (136.9 mg, 55% yield). <sup>1</sup>H-NMR (400 MHz, CDCl<sub>3</sub>) δ ppm: 7.46-7.39 (m, 2H), 7.37-7.30 (m, 3H), 5.96 (q, *J* = 1.4 Hz, 1H), 5.45 (d, *J* = 7.7 Hz, 1H), 4.17 (dhept, *J* = 8.0, 6.6 Hz, 1H), 2.54 (d, *J* = 1.4 Hz, 3H), 1.20 (d, *J* = 6.6 Hz, 6H). <sup>13</sup>C-NMR (100 MHz, CDCl<sub>3</sub>) δ ppm: 166.1, 150.3, 142.8, 128.4, 128.4, 126.1, 120.3, 41.2, 22.9, 17.6. HRMS (ESI-MS) *m/z* calculated for C<sub>13</sub>H<sub>18</sub>NO [M+H]<sup>+</sup>: 204.1383, found: 204.1380.

### **(E)-N-benzyl-3-phenylbut-2-enamide (S11)**

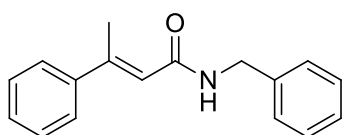

Prepared from **(E)-3-phenylbut-2-enoic acid** (200 mg, 1.23 mmol) and benzylamine (136 μL, 1.23 mmol) using the general procedure C that provided **S11** after purification by

flash column chromatography (hexane/EtOAc/CH<sub>2</sub>Cl<sub>2</sub> 3:1:1) as a waxy orange solid (178.1 mg, 58% yield). <sup>1</sup>H-NMR (400 MHz, CDCl<sub>3</sub>) δ ppm: 7.42 (dd, *J* = 7.8, 2.0 Hz, 2H), 7.38-7.24 (m, 8H), 6.15 (s, 1H), 6.05 (q, *J* = 1.3 Hz, 1H), 4.50 (d, *J* = 5.8 Hz, 2H), 2.58 (d, *J*

= 1.4 Hz, 3H).  $^{13}\text{C}$ -NMR (100 MHz,  $\text{CDCl}_3$ )  $\delta$  ppm: 166.8, 151.3, 142.7, 128.7, 128.6, 128.5, 127.9, 127.5, 126.2, 119.7, 43.5, 17.7. HRMS (ESI-MS)  $m/z$  calculated for  $\text{C}_{17}\text{H}_{18}\text{NO}$   $[\text{M}+\text{H}]^+$ : 252.1383, found: 252.1374.

#### (*E*)-*N*-phenyl-3-phenylbut-2-enamide (**S12**)

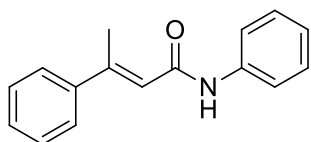

Prepared from (*E*)-3-phenylbut-2-enoic acid (200 mg, 1.23 mmol) and phenylamine (113  $\mu\text{L}$ , 1.23 mmol) using the general procedure C that provided **S12** after purification by flash column chromatography (hexane/EtOAc 9:1-9:3) as a waxy white solid (84.9 mg, 29% yield).  $^1\text{H}$ -NMR (400 MHz,  $\text{CDCl}_3$ )  $\delta$  ppm: 7.58 (d,  $J$  = 7.3 Hz, 2H), 7.51-7.43 (m, 2H), 7.35 (tdd,  $J$  = 14.0, 6.4, 1.7 Hz, 6H), 7.11 (t,  $J$  = 7.4 Hz, 1H), 6.15 (d,  $J$  = 1.3 Hz, 1H), 2.62 (d,  $J$  = 1.3 Hz, 3H).  $^{13}\text{C}$ -NMR (100 MHz,  $\text{CDCl}_3$ )  $\delta$  ppm: 164.9, 153.1, 142.6, 138.1, 129.0, 128.8, 128.5, 126.2, 124.2, 120.0, 119.8, 17.9. HRMS (ESI-MS)  $m/z$  calculated for  $\text{C}_{16}\text{H}_{16}\text{NO}$   $[\text{M}+\text{H}]^+$ : 238.1226, found: 238.1234.

#### (*E*)-*N*-(adamantan-1-yl)-3-phenylbut-2-enamide (**S13**)

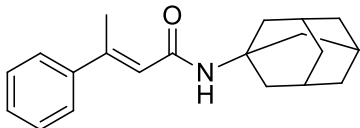

Prepared from (*E*)-3-phenylbut-2-enoic acid (404.5 mg, 2.49 mmol) and 1-adamantylamine (388.9 mg, 2.99 mmol) using the general procedure D that provided **S13** after purification by flash column chromatography (hexane/EtOAc 9:1) as a white solid (383.1 mg, 52% yield).  $^1\text{H}$ -NMR (400 MHz,  $\text{CDCl}_3$ )  $\delta$  ppm: 7.45-7.38 (m, 2H), 7.38-7.27 (m, 3H), 5.93 (q,  $J$  = 1.4 Hz, 1H), 5.28 (s, 1H), 2.52 (d,  $J$  = 1.4 Hz, 3H), 2.10-2.06 (m, 9H), 1.73-1.664 (m, 6H).  $^{13}\text{C}$ -NMR (100 MHz,  $\text{CDCl}_3$ )  $\delta$  ppm: 166.3, 149.7, 143.0, 138.4, 128.3, 126.1, 121.4, 52.1, 41.8, 36.4, 29.5, 17.4. HRMS (ESI-MS)  $m/z$  calculated for  $\text{C}_{20}\text{H}_{26}\text{NO}$   $[\text{M}+\text{H}]^+$ : 296.2009, found: 296.2000.

#### (*E*)-*N,N*-dibenzyl-3-phenylpent-2-enamide (**S14**)

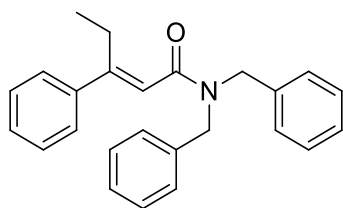

Prepared from (*E*)-3-phenylpent-2-enoic acid (636.9 mg, 3.6 mmol) and dibenzylamine (717  $\mu\text{L}$ , 3.6 mmol) using the general procedure C that provided **S14** after purification by flash column chromatography (hexane/EtOAc/ $\text{CH}_2\text{Cl}_2$  4:2:1) as a pale yellow oil (954.1 mg, 74% yield).  $^1\text{H}$ -NMR (400 MHz,  $\text{CDCl}_3$ )  $\delta$  ppm: 7.43-7.27

(m, 13H), 7.23-7.16 (m, 2H), 6.29 (s, 1H), 4.67 (s, 2H), 4.52 (s, 2H), 2.91 (q,  $J = 7.5$  Hz, 2H), 1.10 (t,  $J = 7.5$  Hz, 3H).  $^{13}\text{C}$ -NMR (101 MHz,  $\text{CDCl}_3$ )  $\delta$  ppm: 168.6, 154.1, 140.8, 137.4, 136.5, 128.9, 128.7, 128.5, 128.4, 128.2, 127.7, 127.5, 126.9, 126.7, 119.4, 50.6, 47.3, 25.0, 13.5. HRMS (ESI-MS)  $m/z$  calculated for  $\text{C}_{25}\text{H}_{25}\text{NNaO}$   $[\text{M}+\text{Na}]^+$ : 378.1828, found: 378.1828.

**(*E*)-*N,N*-dibenzyl-4-methyl-3-phenylpent-2-enamide (**S15**)**

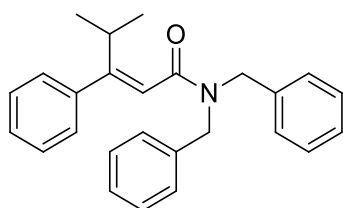

Prepared from (*E*)-4-methyl-3-phenylpent-2-enoic acid (400 mg, 2.1 mmol) and dibenzylamine (417  $\mu\text{L}$ , 2.1 mmol) using the general procedure C that provided **S15** after purification by flash column chromatography

(hexane/EtOAc 9:1) as a pale yellow oil (707.1 mg, 91% yield).  $^1\text{H}$ -NMR (400 MHz,  $\text{CDCl}_3$ )  $\delta$  ppm: 7.38-7.28 (m, 11H), 7.19-7.15 (m, 4H), 5.98 (s, 1H), 4.66 (s, 2H), 4.54 (s, 2H), 3.54 (hept,  $J = 6.9$  Hz, 1H), 1.11 (d,  $J = 7.0$  Hz, 6H).  $^{13}\text{C}$ -NMR (100 MHz,  $\text{CDCl}_3$ )  $\delta$  ppm: 168.5, 158.1, 140.8, 137.3, 136.6, 128.9, 128.6, 128.4, 128.1, 127.8, 127.7, 127.5, 127.2, 126.9, 121.0, 50.7, 47.2, 31.3, 21.5. HRMS (ESI-MS)  $m/z$  calculated for  $\text{C}_{26}\text{H}_{27}\text{NNaO}$   $[\text{M}+\text{Na}]^+$ : 392.1985, found: 392.1992.

**(*E*)-*N,N*-dibenzyl-2-(3,4-dihydronaphthalen-1(2*H*)-ylidene)acetamide (**S16**)**

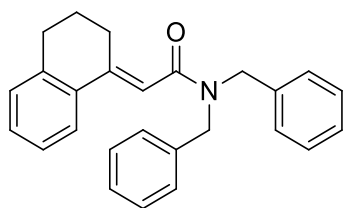

Prepared from (*E*)-2-(3,4-dihydronaphthalen-1(2*H*)-ylidene) acetic acid (126.5 mg, 0.7 mmol) and dibenzylamine (133  $\mu\text{L}$ , 0.7 mmol) using the general procedure C that provided **S16** after purification by flash

column chromatography (hexane/EtOAc 9:1) as a pale yellow solid (214.6 mg, 87% yield).  $^1\text{H}$ -NMR (400 MHz,  $\text{CDCl}_3$ )  $\delta$  ppm: 7.49-7.47 (m, 1H), 7.39-7.29 (m, 8H), 7.21 (td,  $J = 8.4, 7.6, 1.1$  Hz, 3H), 7.12 (dq,  $J = 6.9, 3.1$  Hz, 2H), 6.60 (t,  $J = 1.7$  Hz, 1H), 4.67 (s, 2H), 4.54 (s, 2H), 2.99-2.95 (m, 2H), 2.84 (t,  $J = 6.2$  Hz, 2H), 1.93-1.86 (m, 2H).  $^{13}\text{C}$ -NMR (100 MHz,  $\text{CDCl}_3$ )  $\delta$  ppm: 169.0, 147.1, 139.1, 137.4, 136.7, 134.3, 129.3, 128.9, 128.7, 128.77, 128.5, 127.7, 127.4, 126.9, 126.2, 124.4, 114.8, 50.6, 47.4, 30.2, 28.6, 23.1. HRMS (ESI-MS)  $m/z$  calculated for  $\text{C}_{26}\text{H}_{25}\text{NNaO}$   $[\text{M}+\text{Na}]^+$ : 390.1828, found: 390.1822.

**(E)-N,N-dibenzyl-3-(o-tolyl)but-2-enamide (S17)**

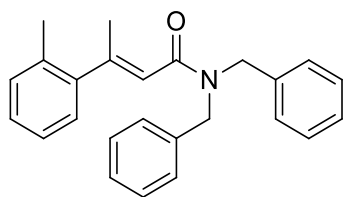

Prepared from **(E)-3-(o-tolyl)but-2-enoic acid** (400 mg, 2.3 mmol) and dibenzylamine (450  $\mu$ L, 2.3 mmol) using the general procedure C that provided **S17** after purification by flash column chromatography (hexane/EtOAc 8:2) as a white solid (668.0 mg, 83% yield).  $^1\text{H-NMR}$  (400 MHz,  $\text{CDCl}_3$ )  $\delta$  ppm: 7.39-7.29 (m, 8H), 7.20-7.13 (m, 5H), 7.08-7.05 (m, 1H), 6.07 (d,  $J = 1.4$  Hz, 1H), 4.68 (s, 2H), 4.54 (s, 2H), 2.35 (d,  $J = 1.4$  Hz, 3H), 2.24 (s, 3H).  $^{13}\text{C-NMR}$  (100 MHz,  $\text{CDCl}_3$ )  $\delta$  ppm: 168.3, 151.0, 143.8, 137.4, 136.6, 134.2, 130.4, 128.9, 128.7, 128.5, 127.7, 127.5, 127.5, 126.7, 125.8, 121.2, 50.3, 47.4, 20.8, 19.8. HRMS (ESI-MS)  $m/z$  calculated for  $\text{C}_{25}\text{H}_{25}\text{NNaO}$   $[\text{M}+\text{Na}]^+$ : 378.1828, found: 378.1828.

**(E)-N,N-dibenzyl-3-(m-tolyl)but-2-enamide (S18)**

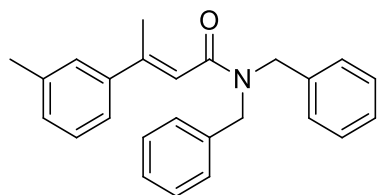

Prepared from **(E)-3-(m-tolyl)but-2-enoic acid** (400 mg, 2.3 mmol) and dibenzylamine (450  $\mu$ L, 2.3 mmol) using the general procedure C that provided **S18** after purification by flash column chromatography (hexane/EtOAc 8:2) as a white solid (512.6 mg, 64% yield).  $^1\text{H-NMR}$  (400 MHz,  $\text{CDCl}_3$ )  $\delta$  ppm: 7.40-7.31 (m, 8H), 7.23-7.20 (m, 5H), 7.13 (d,  $J = 6.5$  Hz, 1H), 6.41 (d,  $J = 1.2$  Hz, 1H), 4.68 (s, 2H), 4.54 (s, 2H), 2.42 (d,  $J = 1.0$  Hz, 3H), 2.35 (s, 3H).  $^{13}\text{C-NMR}$  (100 MHz,  $\text{CDCl}_3$ )  $\delta$  ppm: 168.9, 147.8, 142.0, 138.0, 137.4, 136.6, 129.1, 129.0, 128.7, 128.5, 128.4, 127.7, 127.5, 126.9, 126.8, 123.2, 119.3, 50.6, 47.3, 21.5, 18.4. HRMS (ESI-MS)  $m/z$  calculated for  $\text{C}_{25}\text{H}_{25}\text{NNaO}$   $[\text{M}+\text{Na}]^+$ : 378.1828, found: 378.1815.

**(E)-N,N-dibenzyl-3-(p-tolyl)but-2-enamide (S19)**

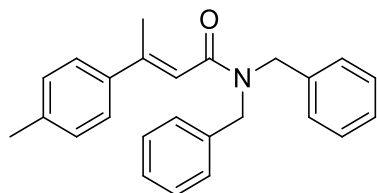

Prepared from **(E)-3-(p-tolyl)but-2-enoic acid** (400 mg, 2.3 mmol) and dibenzylamine (450  $\mu$ L, 2.3 mmol) using the general procedure C that provided **S19** after purification by flash column chromatography (hexane/EtOAc 8:2) as a white solid (595.5 mg, 74% yield).  $^1\text{H-NMR}$  (400 MHz,  $\text{CDCl}_3$ )  $\delta$  ppm: 7.39-7.27 (m, 10H), 7.21-7.16 (m, 2H), 7.13 (d,  $J = 8.0$  Hz, 2H), 6.39 (d,  $J = 1.4$  Hz,

1H), 4.66 (s, 2H), 4.52 (s, 2H), 2.40 (d, J = 1.1 Hz, 3H), 2.34 (s, 3H). <sup>13</sup>C-NMR (100 MHz, CDCl<sub>3</sub>) δ ppm: 168.9, 147.6, 139.1, 138.3, 137.4, 136.6, 129.1, 128.9, 128.6, 128.4, 127.7, 127.42, 126.9, 125.9, 118.6, 50.5, 47.4, 21.1, 18.2. HRMS (ESI-MS) m/z calculated for C<sub>25</sub>H<sub>25</sub>NNaO [M+Na]<sup>+</sup>: 378.1828, found: 378.1824.

**(E)-N,N-dibenzyl-3-(4-(trifluoromethyl)phenyl)but-2-enamide (S20)**

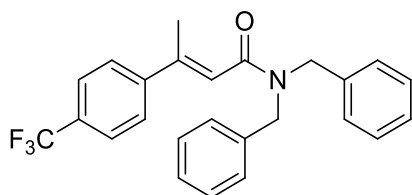

Prepared from **(E)-3-(4-(trifluoromethyl)phenyl)but-2-enoic acid** (400 mg, 1.7 mmol) and dibenzylamine (345 μL, 1.7 mmol) using the general procedure C that provided **S20** after purification by flash column

chromatography (hexane/EtOAc 9:1) as a beige oil (613.3 mg, 86% yield). <sup>1</sup>H-NMR (400 MHz, CDCl<sub>3</sub>) δ ppm: 7.57 (d, J = 8.2 Hz, 2H), 7.47 (d, J = 7.9 Hz, 2H), 7.42-7.27 (m, 8H), 7.22-7.15 (m, 2H), 6.43 (d, J = 1.2 Hz, 1H), 4.67 (s, 2H), 4.51 (s, 2H), 2.40 (d, J = 1.3 Hz, 3H). <sup>13</sup>C-NMR (100 MHz, CDCl<sub>3</sub>) δ ppm: 168.3, 146.0, 145.4, 137.1, 136.3, 129.0, 128.7, 128.5, 127.8, 127.6, 126.8, 126.4, 125.5, 125.5, 125.4, 121.4, 50.5, 47.5, 18.2. HRMS (ESI-MS) m/z calculated for C<sub>25</sub>H<sub>22</sub>F<sub>3</sub>NNaO [M+Na]<sup>+</sup>: 432.1546, found: 432.1550.

**(E)-N,N-dibenzyl-3-(4-methoxyphenyl)but-2-enamide (S21)**

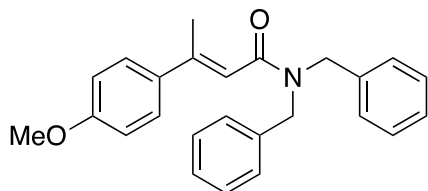

Prepared from **(E)-3-(4-methoxyphenyl)but-2-enoic acid** (400 mg, 2.1 mmol) and dibenzylamine (413 μL, 2.1 mmol) using the general procedure C that provided **S21** after purification by flash column

chromatography (hexane/EtOAc 8:2) as a white solid (577.4 mg, 75% yield). <sup>1</sup>H-NMR (400 MHz, CDCl<sub>3</sub>) δ ppm: 7.39-7.28 (m, 10H), 7.20 (d, J = 7.1 Hz, 2H), 6.87-6.84 (m, 2H), 6.37 (d, J = 1.3 Hz, 1H), 4.67 (s, 2H), 4.53 (s, 2H), 3.80 (s, 3H), 2.41 (d, J = 1.3 Hz, 3H). <sup>13</sup>C-NMR (100 MHz, CDCl<sub>3</sub>) δ ppm: 169.0, 159.9, 147.2, 137.5, 136.7, 134.3, 128.9, 128.6, 128.4, 127.7, 127.4, 127.3, 126.9, 117.7, 113.8, 55.3, 50.6, 47.4, 18.2. HRMS (ESI-MS) m/z calculated for C<sub>25</sub>H<sub>25</sub>NNaO<sub>2</sub> [M+Na]<sup>+</sup>: 394.1778, found: 394.1776.

**(E)-N,N-dibenzyl-3-(4-chlorophenyl)but-2-enamide (S22)**

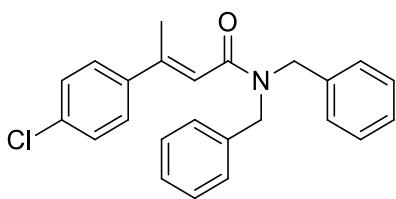

Prepared from **(E)-3-(4-chlorophenyl)but-2-enoic acid** (400 mg, 2.0 mmol) and dibenzylamine (403  $\mu$ L, 2.0 mmol) using the general procedure C that provided **S22** after purification by flash column chromatography (hexane/EtOAc 9:1) as a white solid (487.0 mg, 64% yield).  $^1\text{H-NMR}$  (400 MHz,  $\text{CDCl}_3$ )  $\delta$  ppm: 7.37-7.27 (m, 12H), 7.19-7.17 (m, 2H), 6.38 (q,  $J$  = 1.3 Hz, 1H), 4.66 (s, 2H), 4.51 (s, 2H), 2.38 (d,  $J$  = 1.3 Hz, 3H).  $^{13}\text{C-NMR}$  (100 MHz,  $\text{CDCl}_3$ )  $\delta$  ppm: 168.5, 146.2, 140.3, 137.2, 136.5, 134.3, 129.0, 128.7, 128.6, 128.4, 127.8, 127.5, 127.3, 126.8, 119.9, 50.5, 47.4, 18.2. HRMS (ESI-MS)  $m/z$  calculated for  $\text{C}_{24}\text{H}_{22}\text{ClNNaO}$   $[\text{M}+\text{Na}]^+$ : 398.1282, found: 398.1281.

#### **(E)-N,N-dibenzyl-3-(naphthalen-2-yl)but-2-enamide (S23)**

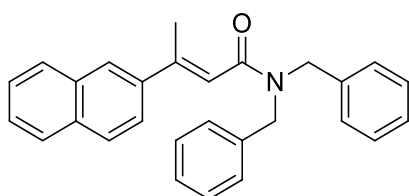

Prepared from **(E)-3-(naphthalen-2-yl)but-2-enoic acid** (400 mg, 1.9 mmol) and dibenzylamine (374  $\mu$ L, 1.9 mmol) using the general procedure C that provided **S23** after purification by flash column chromatography (hexane/EtOAc/ $\text{CH}_2\text{Cl}_2$  9:1:1) as a waxy white solid (587.7 mg, 80% yield).  $^1\text{H-NMR}$  (400 MHz,  $\text{CDCl}_3$ )  $\delta$  ppm: 7.87-7.76 (m, 4H), 7.53 (dd,  $J$  = 8.6, 1.9 Hz, 1H), 7.51-7.44 (m, 2H), 7.42-7.29 (m, 8H), 7.22 (d,  $J$  = 7.0 Hz, 2H), 6.57 (d,  $J$  = 1.2 Hz, 1H), 4.71 (s, 2H), 4.57 (s, 2H), 2.57-2.50 (m, 3H).  $^{13}\text{C-NMR}$  (100 MHz,  $\text{CDCl}_3$ )  $\delta$  ppm: 168.8, 147.2, 139.1, 137.4, 136.6, 133.2, 133.2, 129.0, 128.7, 128.5, 128.3, 128.1, 127.7, 127.6, 127.5, 126.9, 126.4, 126.4, 125.3, 123.9, 120.0, 50.6, 47.5, 18.2. HRMS (ESI-MS)  $m/z$  calculated for  $\text{C}_{28}\text{H}_{25}\text{NNaO}$   $[\text{M}+\text{Na}]^+$ : 414.1828, found: 414.1841.

#### **(E)-N,N-dibenzyl-3-phenylpent-2-enamide (S24)**

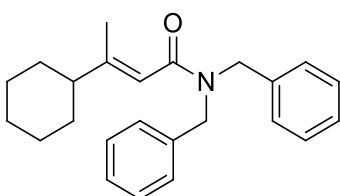

Prepared from **(E)-3-cyclohexylbut-2-enoic acid** (400 mg, 2.4 mmol) and dibenzylamine (471  $\mu$ L, 2.4 mmol) using the general procedure C that provided **S24** after purification by flash column chromatography (hexane/EtOAc 9:1) as a pale yellow oil (596.1 mg, 72% yield).  $^1\text{H-NMR}$  (400 MHz,  $\text{CDCl}_3$ )  $\delta$  ppm: 7.38-7.24 (m, 8H), 7.16 (d,  $J$  = 7.0 Hz, 2H), 5.93-5.89 (m, 1H), 4.59 (s, 2H), 4.44 (s, 2H), 1.98 (d,  $J$  = 1.2 Hz, 3H), 1.92 (ddd,  $J$  = 13.8, 10.0, 2.9 Hz, 1H), 1.80-1.62 (m, 5H), 1.28-1.08 (m, 5H).  $^{13}\text{C-NMR}$

(101 MHz, CDCl<sub>3</sub>)  $\delta$  ppm: 169.4, 155.6, 137.6, 136.9, 128.8, 128.6, 128.4, 127.6, 127.3, 126.9, 115.8, 50.4, 47.5, 47.1, 31.5, 26.5, 26.2, 17.2. HRMS (ESI-MS)  $m/z$  calculated for C<sub>24</sub>H<sub>29</sub>NNaO [M+Na]<sup>+</sup>: 370.2141, found: 370.2153.

***N,N*-dibenzyl-3,6-dimethylhept-2-enamide (S25)**

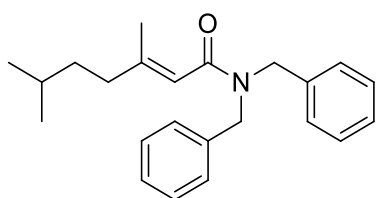

Prepared from **3,6-dimethylhept-2-enoic acid** (400 mg, 2.6 mmol) and dibenzylamine (508  $\mu$ L, 2.6 mmol) using the general procedure C that provided **S25** after purification by flash column chromatography (hexane/EtOAc 9:1-8:2) as a pale yellow oil (720.0 mg, 84% yield, *E:Z* 78:22). <sup>1</sup>H-NMR (400 MHz, CDCl<sub>3</sub>)  $\delta$  ppm:  $\delta$  7.55-7.22 (m, 8H, *E* and *Z* isomers), 7.17 (d, *J* = 7.6 Hz, 2H, *E* and *Z* isomers), 5.94 (s, 0.56H, *E* isomer), 5.90 (s, 0.15H, *Z* isomer), 4.61 (s, 2H, *E* and *Z* isomers), 4.46 (s, 2H, *E* and *Z* isomers), 2.48-2.40 (m, 0.32H, *Z* isomer), 2.14-2.05 (m, 1.28H, *E* isomer), 2.03 (s, 1.55H, *E* isomer), 1.81 (s, 0.48H, *Z* isomer), 1.77 (t, *J* = 6.9 Hz, 0.29H, *Z* isomer), 1.62- 1.44 (m, 1H, *E* and *Z* isomers), 1.40-1.36 (m, 0.38H, *Z* isomer), 1.35-1.26 (m, 1.24H, *E* isomer), 0.93 (d, *J* = 6.6 Hz, 0.98H, *Z* isomer), 0.85 (d, *J* = 6.6 Hz, 3.22H, *E* isomer), 0.82 (d, *J* = 6.6 Hz, 0.80H, *Z* isomer). <sup>13</sup>C-NMR (100 MHz, CDCl<sub>3</sub>)  $\delta$  ppm: 169.0 (*E* isomer), 168.8 (*Z* isomer), 151.9 (*E* isomer), 151.7 (*Z* isomer), 137.6 (*E* isomer), 137.5 (*Z* isomer), 136.9 (*E* isomer), 136.8 (*Z* isomer), 129.0, 128.9, 128.6, 128.56, 128.5, 128.4, 127. 6, 127.3, 126.8, 126.4, 117.9, 117.0, 50.4, 49.7, 47.2, 47.0, 37.9, 37.2, 36.6, 31.9, 28.4, 27.7, 23. 9, 22.5, 18.9. HRMS (ESI-MS)  $m/z$  calculated for C<sub>23</sub>H<sub>29</sub>NNaO [M+Na]<sup>+</sup>: 358.2141, found: 358.2144.

***(E)*-N,N**-dibenzyl-3-methyl-4-phenylbut-2-enamide (**S26**)

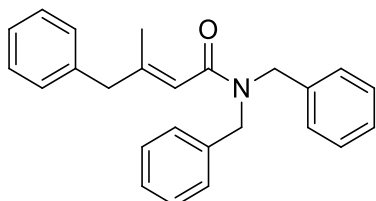

Prepared from **(*E*)-3-methyl-4-phenylbut-2-enoic acid** (200.0 mg, 1.1 mmol) and dibenzylamine (225  $\mu$ L, 1.1 mmol) using the general procedure C that provided **S26** after purification by flash column chromatography (hexane/EtOAc 5:1) as a pale yellow oil (329.0 mg, 82% yield). <sup>1</sup>H-NMR (400 MHz, CDCl<sub>3</sub>)  $\delta$  ppm: 7.38-7.29 (m, 5H), 7.27-7.17 (m, 6H), 7.14-7.11 (m, 2H), 7.09-7.07 (m, 2H), 5.91

(q,  $J = 1.3$  Hz, 1H), 4.62 (s, 2H), 4.42 (s, 2H), 3.38 (d,  $J = 1.2$  Hz, 2H), 2.00 (d,  $J = 1.3$  Hz, 3H).  $^{13}\text{C}$ -NMR (100 MHz,  $\text{CDCl}_3$ )  $\delta$  ppm: 168.7, 150.1, 138.2, 137.4, 136.7, 129.1, 128.9, 128.6, 128.5, 128.4, 127.6, 127.4, 126.8, 126.5, 119.2, 50.4, 47.4, 46.2, 18.8. HRMS (ESI-MS)  $m/z$  calculated for  $\text{C}_{25}\text{H}_{25}\text{NNaO}$   $[\text{M}+\text{Na}]^+$ : 378.1828, found: 378.1836.

**(Z)-N,N-dibenzyl-3-phenylpent-2-enamide (S27)**

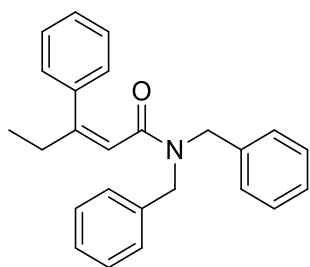

Prepared from **(Z)-3-phenylpent-2-enoic acid** (322.0 mg, 1.8 mmol) and dibenzylamine (362  $\mu\text{L}$ , 1.8 mmol) using the general procedure C that provided **S27** after purification by flash column chromatography (hexane/EtOAc/ $\text{CH}_2\text{Cl}_2$  4:2:1) as a pale orange oil (974.5 mg, 38% yield).  $^1\text{H}$ -NMR (400 MHz,  $\text{CDCl}_3$ )  $\delta$  ppm: 7.35-7.29 (m, 8H), 7.23-7.16 (m, 3H), 7.05-7.02 (m, 2H), 6.84 (dd,  $J = 7.6, 1.7$  Hz, 2H), 6.09 (t,  $J = 1.3$  Hz, 1H), 4.46 (s, 2H), 4.30 (s, 2H), 2.48 (qd,  $J = 7.4, 1.4$  Hz, 2H), 1.05 (t,  $J = 7.4$  Hz, 3H).  $^{13}\text{C}$ -NMR (100 MHz,  $\text{CDCl}_3$ )  $\delta$  ppm: 169.6, 149.7, 139.8, 136.7, 128.8, 128.5, 128.4, 128.3, 127.8, 127.6, 127.2, 119.3, 50.6, 46.3, 31.3, 12.4. HRMS (ESI-MS)  $m/z$  calculated for  $\text{C}_{25}\text{H}_{26}\text{NO}$   $[\text{M}+\text{H}]^+$ : 356.2009, found: 356.2017.

### 3) Synthesis of complexes

Bipyrrolidine based  $\text{NMe}_2\text{pdp-Mn}$ ,<sup>21</sup>  $\text{NMe}_2\text{pdp-Fe}$ ,<sup>22</sup>  $\text{tipspdp-Mn}$ <sup>23</sup> and  $\text{tipspdp-Fe}$ <sup>24</sup> complexes were synthesized following previously described procedures.

#### 3.1) Synthesis of the Ohq backbone

The (*S,S*)-1,1',2,2',3,3',4,4'-octahydro-1,4'-biisoquinoline ((*S,S*)-**Ohq**) was synthesized according to a described procedure.<sup>25</sup>

#### 3.2) Synthesis of pyridine synthons

Pyridine synthons 2-chloromethyl-4-dimethylaminopyridine hydrochloride,  $\text{Me}_2\text{NPyCH}_2\text{Cl}\cdot\text{HCl}$ <sup>26</sup> and 2-chloromethyl-5-triisopropylpyridine hydrochloride,  $\text{tipsPyCH}_2\text{Cl}\cdot\text{HCl}$ ,<sup>23</sup> were synthesized following previously described procedures.

#### 3.3) Synthesis and characterization of $\text{Me}_2\text{NOhq}$

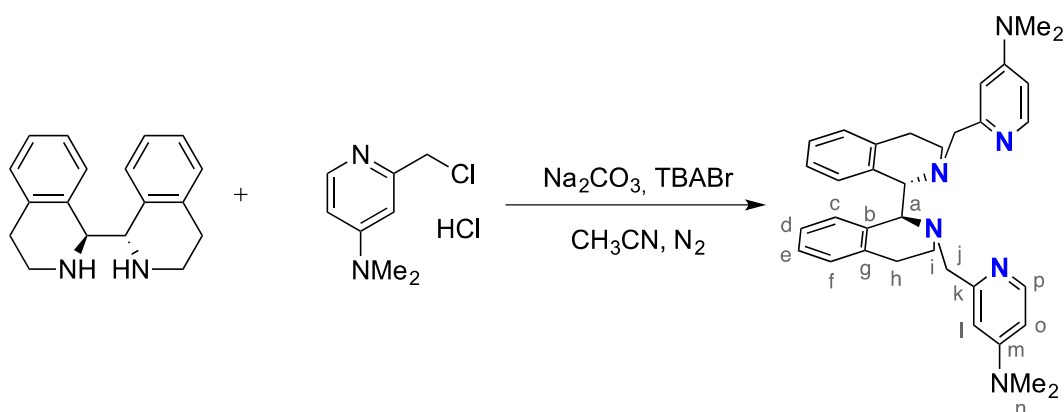

**Scheme S1.** Synthesis and nomenclature of the new ligands used in this work.

2-chloromethyl-4-dimethylaminopyridine hydrochloride,  $\text{Me}_2\text{NPyCH}_2\text{Cl}\cdot\text{HCl}$  (400 mg, 1.93 mmol), (*S,S*)-**Ohq** (243.1 mg, 0.92 mmol) and anhydrous acetonitrile (45 mL) were mixed in a 100 mL flask.  $\text{Na}_2\text{CO}_3$  (1.56 g) and tetrabutylammonium bromide, TBABr (20 mg) were added directly as solids and the resulting mixture was heated at reflux under  $\text{N}_2$  for 18 hours. After cooling to room temperature, the resulting brown mixture was filtered and the filter cake was washed with  $\text{CH}_2\text{Cl}_2$ . The combined filtrates were evaporated under reduced pressure. To the resulting residue, 1M NaOH (20 mL) was added and the mixture was extracted with  $\text{CH}_2\text{Cl}_2$  (3 x 15 mL). The combined organic layers were dried over anhydrous  $\text{MgSO}_4$  and the solvent was removed under reduced

pressure. After, the residue was purified by flash column chromatography (silica  $\text{CH}_2\text{Cl}_2:\text{MeOH}:\text{NH}_3$  96:3:1) to provide 334.4 mg (68% yield) of a brown oil.  $^1\text{H}$ -NMR ( $\text{CDCl}_3$ , 400 MHz, 300K)  $\delta$ , ppm: 8.15 (2H, d, J 6.0,  $\text{H}_p$ ), 7.28 (2H, d, J 6.7,  $\text{H}_f$ ), 6.99-6.96 (2H, m,  $\text{H}_d$ ), 6.92-6.86 (6H, m,  $\text{H}_{c,e,l}$ ), 6.42 (2H, dd, J 2.7, 6.0,  $\text{H}_o$ ), 4.23 (2H, s,  $\text{H}_a$ ), 4.07 (2H, d, J 14.3,  $\text{H}_j$ ), 3.76 (2H, d, J 14.2,  $\text{H}_i$ ), 3.41-3.33 (2H, m,  $\text{H}_i$ ), 2.99 (12H, s,  $\text{H}_n$ ), 2.69 (6H, apparent m,  $\text{H}_{i',h}$ ).  $^{13}\text{C}$ -NMR ( $\text{CDCl}_3$ , 133 MHz, 300K)  $\delta$ , ppm: 159.7 ( $\text{C}_m$ ), 155.1 ( $\text{C}_k$ ), 148.6 ( $\text{C}_p$ ), 136.30 ( $\text{C}_g$  or  $\text{C}_b$ ), 136.25 ( $\text{C}_g$  or  $\text{C}_b$ ), 128.8 ( $\text{C}_f$ ), 127.8 ( $\text{C}_e$ ), 125.6 ( $\text{C}_d$ ), 124.6 ( $\text{C}_c$ ), 105.36 ( $\text{C}_l$  or  $\text{C}_o$ ), 105.32 ( $\text{C}_l$  or  $\text{C}_o$ ), 67.2 ( $\text{C}_a$ ), 61.51 ( $\text{C}_j$ ), 46.8 ( $\text{C}_i$ ), 39.15 ( $\text{C}_n$ ), 27.3 ( $\text{C}_h$ ). HRMS (ESI-MS)  $m/z$  calculated for  $\text{C}_{34}\text{H}_{41}\text{N}_6$   $[\text{M}+\text{H}]^+$ : 533.3387, found: 533.3373. FT-IR (ATR)  $\nu$ ,  $\text{cm}^{-1}$ : 3057-2808(C-H)  $\text{sp}^3$ , 1595, 1542, 1504, 1431, 1372, 1268, 1220, 1126, 1091, 1061, 999, 939, 805, 726, 579, 453.

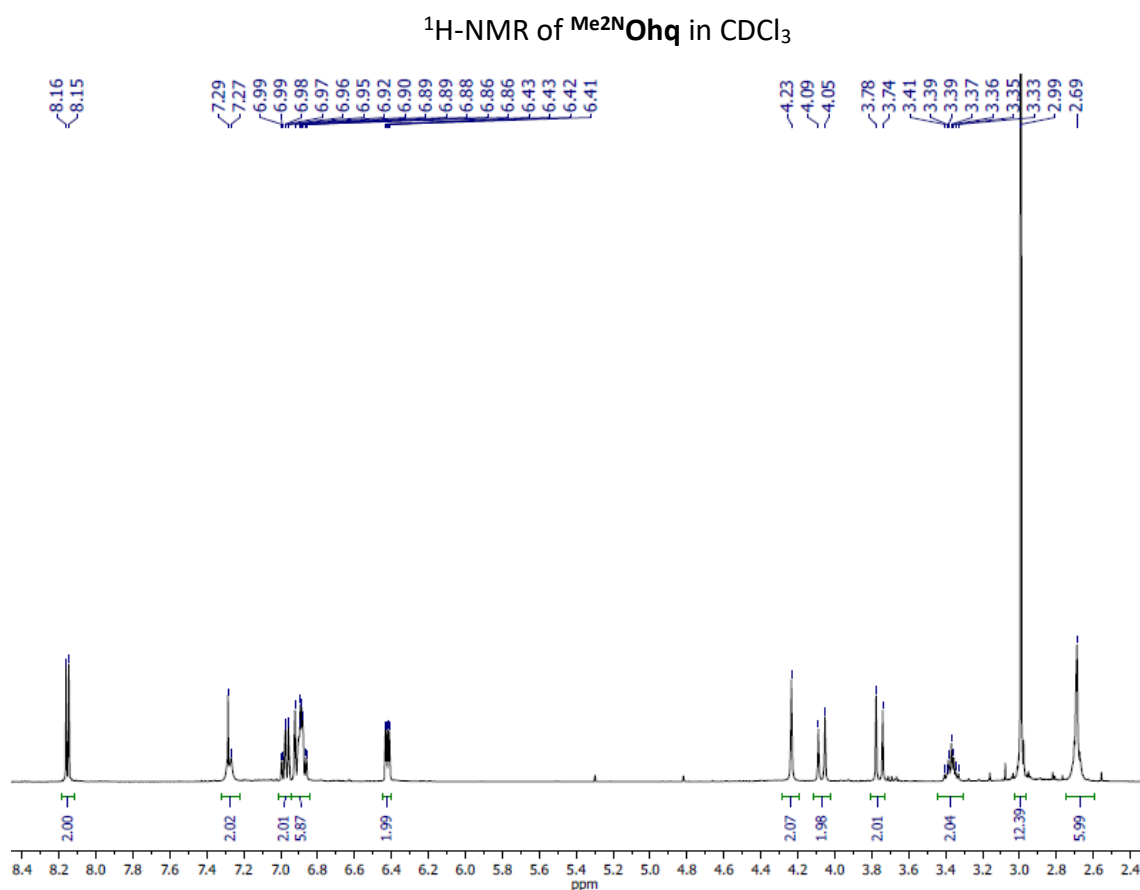

$^{13}\text{C}$ -NMR of  $\text{Me}_2\text{N}^+\text{Ohq}$  in  $\text{CDCl}_3$

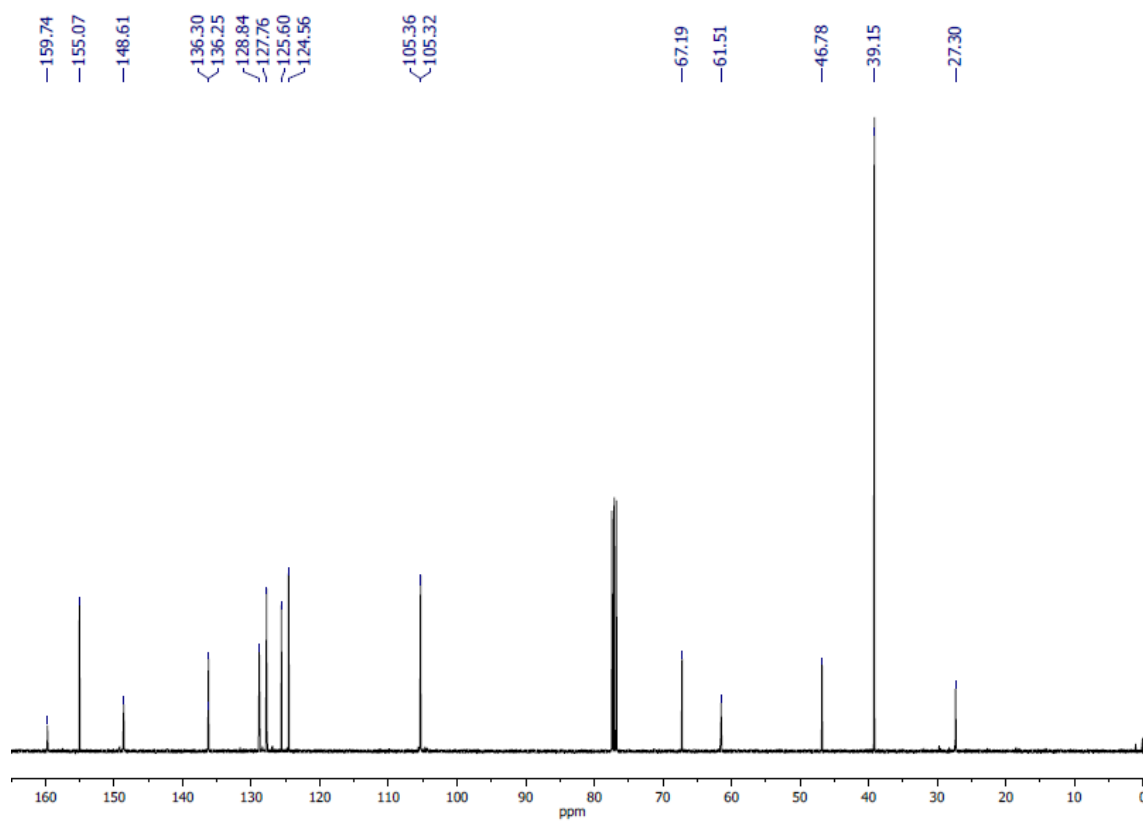

IR of  $\text{Me}_2\text{N}^+\text{Ohq}$

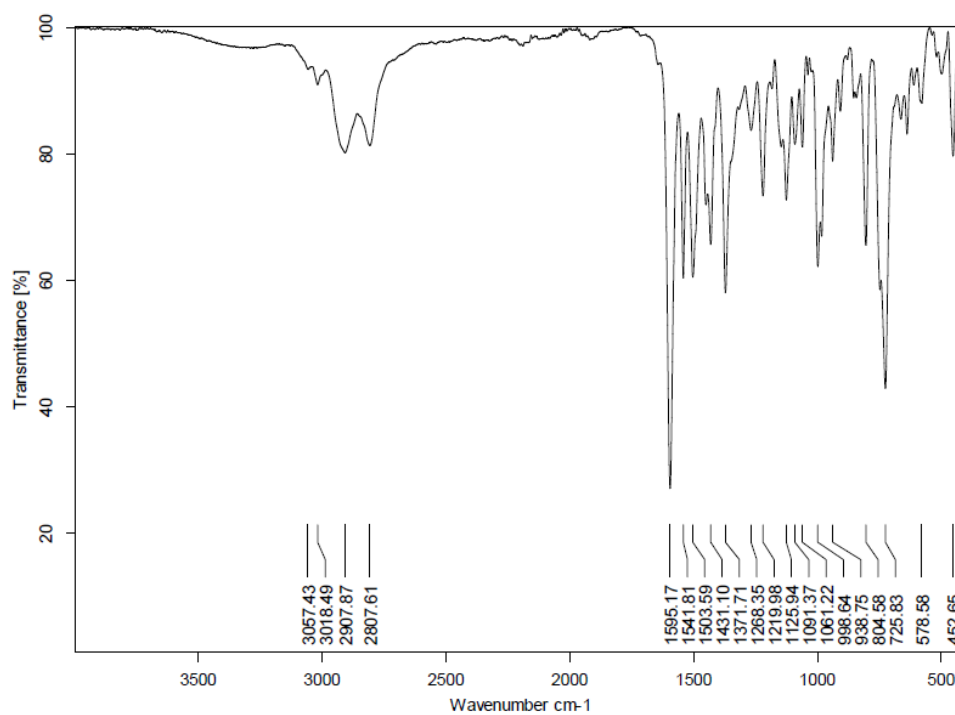

### 3.4) Synthesis and characterization of <sup>Me2N</sup>Ohq-Mn

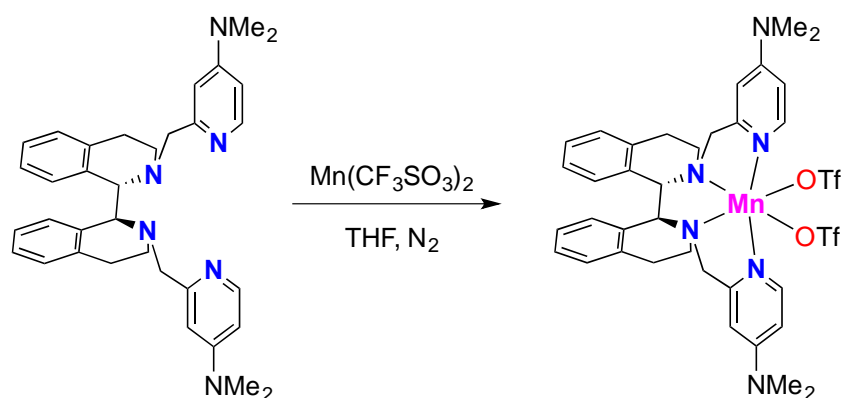

**Scheme S2.** Synthesis and nomenclature of new manganese triflate complexes used in this work.

<sup>Me2N</sup>Ohq-Mn was synthesized following a similar procedure described in literature. Under a N<sub>2</sub> atmosphere, a suspension of Mn(CF<sub>3</sub>SO<sub>3</sub>)<sub>2</sub> (68.3 mg, 194 μmol) in anhydrous THF (1 mL) was added drop-wise to a vigorously stirred solution of <sup>Me2N</sup>Ohq (103.1 mg, 194 μmol) in anhydrous THF (1 mL). After stirring overnight, ether was added until complete precipitation. The brown solid was filtered, dried and solved in the minimum quantity of CH<sub>2</sub>Cl<sub>2</sub> and the solution filtered off through celite®. Slow hexane diffusion over the resultant solution afforded in a few days white-off crystals (106.0 mg, 62% yield). Anal. calculated for C<sub>36</sub>H<sub>40</sub>F<sub>6</sub>MnN<sub>6</sub>O<sub>6</sub>S<sub>2</sub>: C, 48.81; H, 4.55; N, 9.49. Found: C, 49.27; H, 4.74; N, 9.08. FT-IR (ATR) ν, cm<sup>-1</sup>: 2925-2850 (C-H)sp<sup>3</sup>, 1615, 1529, 1388, 1299, 1213, 1020, 995, 863, 810, 761, 635, 581, 513, 460. ESI-HRMS calculated for C<sub>35</sub>H<sub>40</sub>F<sub>3</sub>MnN<sub>4</sub>O<sub>3</sub>S [M-OTf]<sup>+</sup>: 736.2210, found: 736.2237.

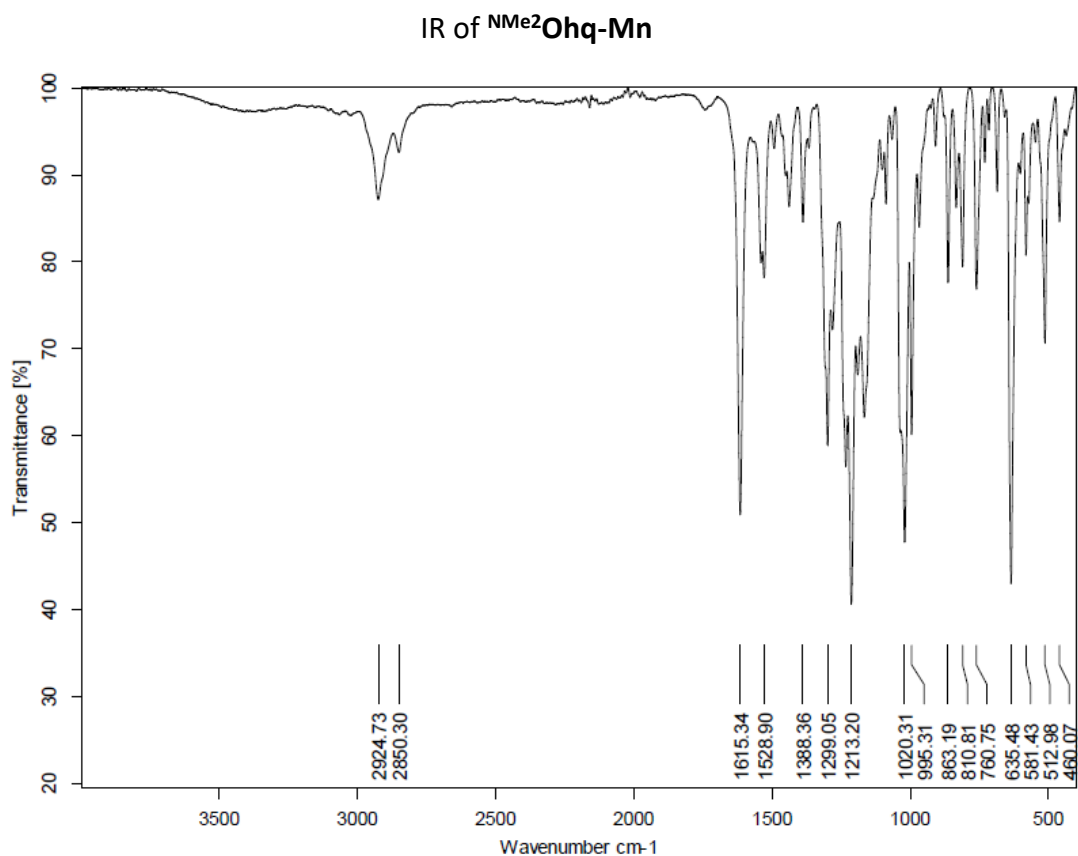

### 3.5) Synthesis of <sup>Me<sub>2</sub>N</sup>Ohq-Fe

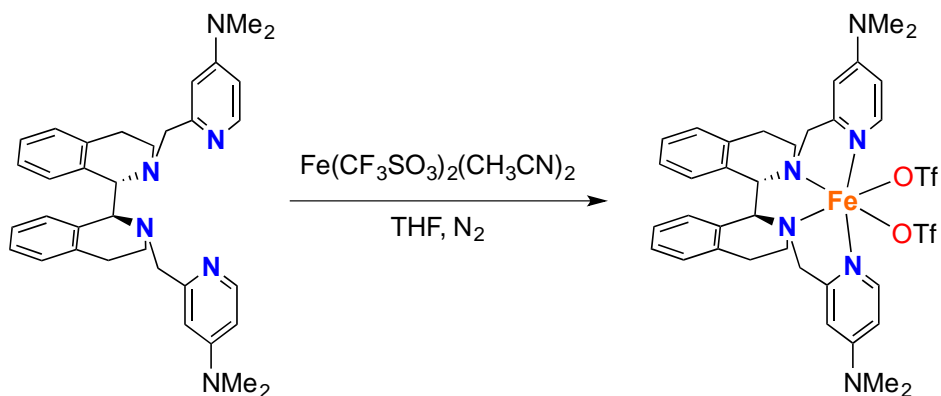

**Scheme S3.** Synthesis and nomenclature of new iron triflate complexes used in this work.

<sup>Me<sub>2</sub>N</sup>Ohq-Fe was prepared in a similar manner to <sup>Me<sub>2</sub>N</sup>Ohq-Mn, starting from <sup>Me<sub>2</sub>N</sup>Ohq and  $\text{Fe}(\text{CF}_3\text{SO}_3)_2(\text{CH}_3\text{CN})_2$  in anhydrous THF, and recrystallized by diffusion of diethyl ether to  $\text{CH}_2\text{Cl}_2$  solution of the complex, to obtain pink crystals, which are unstable under air. Anal. Calcd for  $\text{C}_{36}\text{H}_{40}\text{F}_6\text{FeN}_6\text{O}_6\text{S}_2 \cdot 1/2 \text{CH}_2\text{Cl}_2$ : C, 47.18 H, 4.45; N, 9.04. Found: C, 47.21; H, 4.28; N, 9.01. FT-IR (ATR)  $\nu$ ,  $\text{cm}^{-1}$ : 2919 (C-H) $\text{sp}^3$ , 1617, 1529, 1388, 1296, 1213,

1159, 1020, 996, 865, 817, 761, 633, 581, 512, 459.  $^1\text{H-NMR}$  ( $\text{CD}_2\text{Cl}_2$ , 400 MHz, 300K)  $\delta$ , ppm: 153.7 (s, 3H), 83.4 (s 2H), 52.4 (s, 1H), 39.4 (s, 3H), 38.1 (s, 2H), 31.5 (s, 2H), 27.6 (s, 2H), 18.5 (s, 2H), 15.1 (s, 2H), 9.39 (s, 14H), -3.02 (s, 1H), -6.9 (s, 1H), 28.7 (s, 1H). ESI-HRMS calculated for  $\text{C}_{35}\text{H}_{40}\text{F}_3\text{FeN}_4\text{O}_3\text{S}$   $[\text{M-OTf}]^+$ : 737.2179, found: 737.2179.

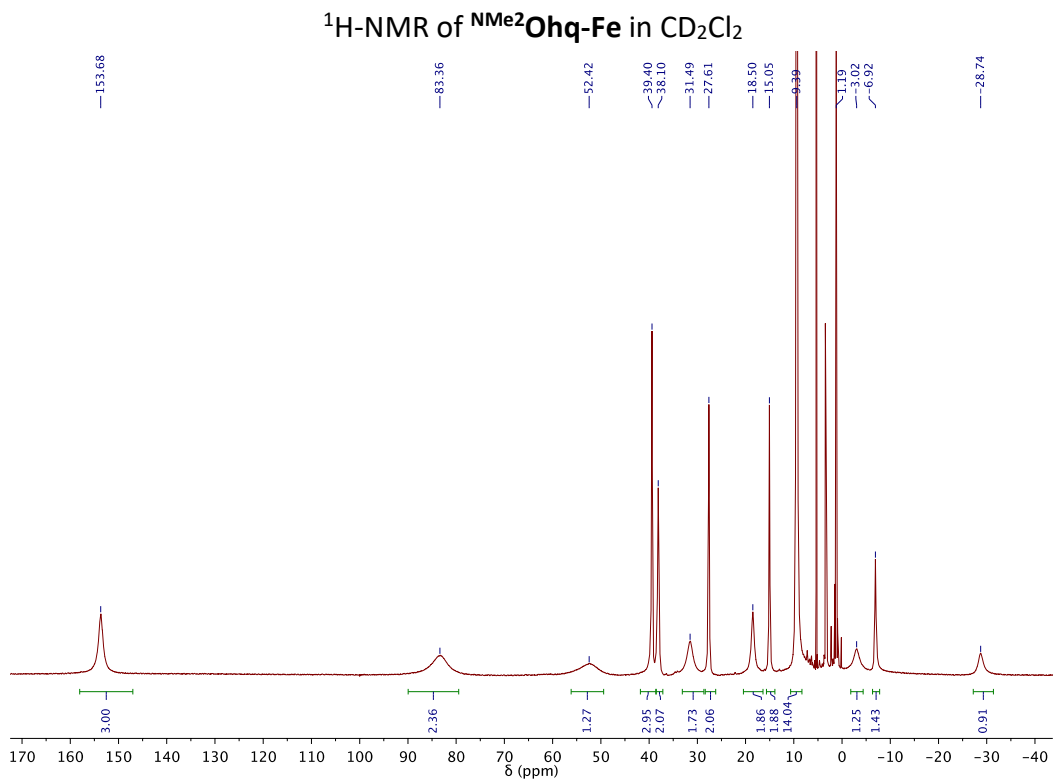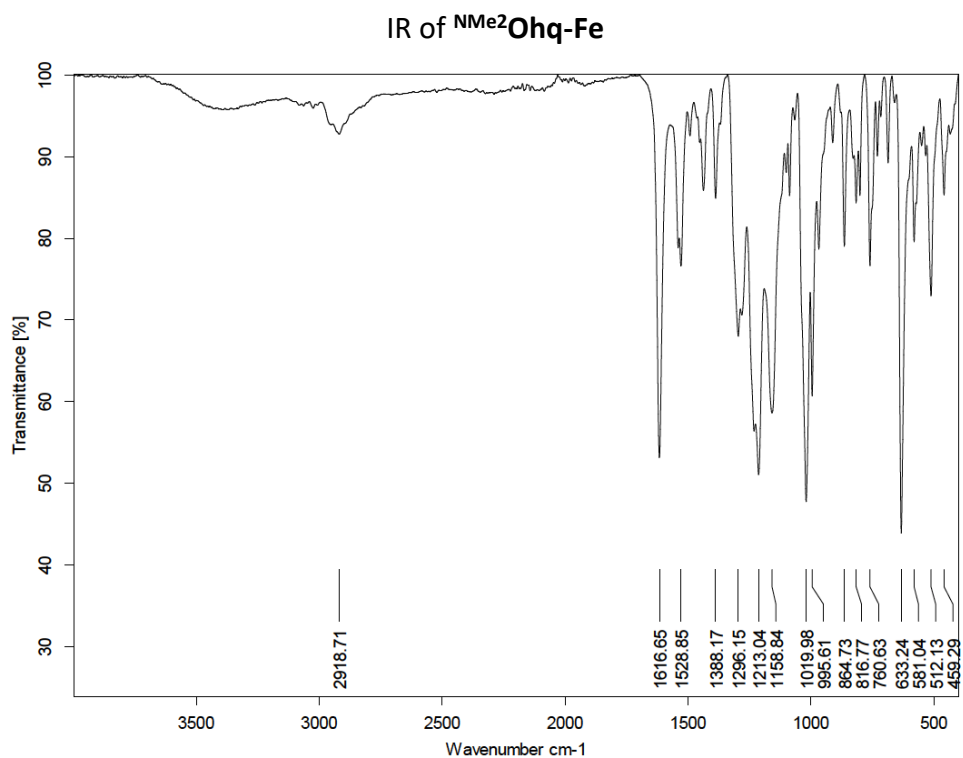

## 4) Catalytic studies

Hydrogen peroxide solutions employed in the reactions were prepared by diluting commercially available hydrogen peroxide (30% H<sub>2</sub>O<sub>2</sub> solution in water, Aldrich) in acetonitrile (1:3 or 1:7 v:v).

### 4.1) Reaction conditions (Table 1)

An acetonitrile solution (750  $\mu$ L) of a given olefin (**S1-S2**) (88  $\mu$ mol) and the corresponding complex (1 mol% for Mn and 2 mol% for Fe) was prepared in a vial (3 mL) equipped with a stir bar and cooled at 0°C in an ice bath. 14 equiv. (for Mn catalysts) or 1.4 equiv (for Fe catalysts) of carboxylic acid were directly added to the solution. Then, 70  $\mu$ L of 3:1 (v:v) acetonitrile:hydrogen peroxide solution 30% (2 equiv., 0.18 mmol) were added by syringe pump over a period of 30 min. The solution was further stirred at 0°C for 30 minutes. At this point, 0.5 equiv. of internal standard (1,3,5-trimethoxybenzene) and 5 mL of a saturated aqueous solution of NaHCO<sub>3</sub> were added, and the resulting mixture was extracted with 2 mL of CH<sub>2</sub>Cl<sub>2</sub> (x3). Then, organic layers were dried over MgSO<sub>4</sub> and the solvents were removed under reduced pressure. The resultant product was dissolved in CDCl<sub>3</sub> and the yield and conversion were calculated by <sup>1</sup>H-NMR. Finally, the solvent was removed under reduced pressure and was dissolved in *n*-hexane/*iso*-propanol and analyzed by HPLC.

## 4.2) Optimization of epoxidation of S1

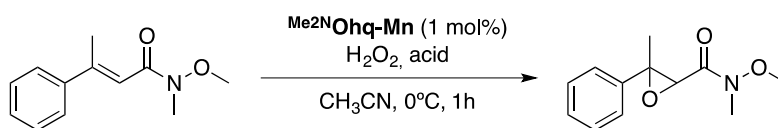

Acid:

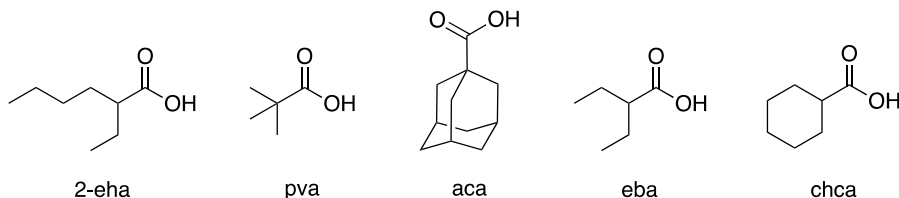

| Entry             | Acid (equiv.) | Equiv. of H <sub>2</sub> O <sub>2</sub> | Conv (yield,%) <sup>[a]</sup> | ee (%) <sup>[b]</sup> |
|-------------------|---------------|-----------------------------------------|-------------------------------|-----------------------|
| 1                 | 2-eha (14)    | 2                                       | 94 (69)                       | 79                    |
| 4                 | pva (14)      | 2                                       | 100(79)                       | 69                    |
| 5                 | eba (14)      | 2                                       | 95(78)                        | 77                    |
| 6                 | aca (5)       | 2                                       | 27(25)                        | 69                    |
| 7                 | chca (14)     | 2                                       | 92(73)                        | 65                    |
| 8                 | 2-eha (5)     | 2                                       | 89(63)                        | 80                    |
| 9                 | 2-eha (1)     | 2                                       | 89(78)                        | 76                    |
| 10                | eba (5)       | 2                                       | 99(68)                        | 78                    |
| 11                | eba (1)       | 2                                       | 100(73)                       | 74                    |
| 12                | 2-eha (1)     | 3                                       | 100(85)                       | 76                    |
| 13 <sup>[c]</sup> | 2-eha (1)     | 3                                       | 77(76)                        | 86                    |
| 14 <sup>[c]</sup> | 2-eha (5)     | 3                                       | 75(64)                        | 88                    |
| 15 <sup>[c]</sup> | 2-eha (14)    | 3                                       | 82(80)                        | 88                    |

[a] Epoxide yields and substrate conversion determined by <sup>1</sup>H-NMR using 1,3,5-trimethoxybenzene as internal standard. [b] ee's determined by HPLC with a chiral stationary phase. [c] Reactions performed at -40°C

## 4.3) Reaction conditions (Tables 2 and 3)

An acetonitrile solution (750 µL) of a given olefin (**S3-S27**) (44 µmols) and <sup>Me</sup>2N-Ohq-Mn (1 mol%) was prepared in a vial (3 mL) equipped with a stir bar and cooled at -40°C in an acetonitrile frozen bath. 7 µL or 36 µL (neat, 1 or 5 equiv., 44 µmols or 220 µmols) of 2-ethylhexanoic acid were added directly to the solution. Then, 70 µL of 7:1 (v:v) acetonitrile:hydrogen peroxide solution 30% (3 equiv., 0.132 mmol) was added by

syringe pump over a period of 30 min. The solution was further stirred at -40°C for 30 minutes. At this point, 0.5 equiv. of internal standard (1,3,5-trimethoxybenzene) and 5 mL of a saturated aqueous solution of NaHCO<sub>3</sub> were added, and the resulting mixture was extracted with 2 mL of CH<sub>2</sub>Cl<sub>2</sub> (x3). Then, organic layers were dried over MgSO<sub>4</sub>, passed through a plug of silica and the solvents were removed under reduced pressure. The resultant product was dissolved in CDCl<sub>3</sub> and the yield and conversion were calculated by <sup>1</sup>H-NMR. Finally, the solvent was removed under reduced pressure and was dissolved in *n*-hexane/*iso*-propanol and analyzed by HPLC.

#### 4.4) General procedure for epoxide isolation (Tables 2 and 3)

An acetonitrile solution (0.06M) of a given olefin (**S3-S26**) (0.2 mmol – 1.5 mmol) and <sup>Me2N</sup>OhqMn (1 mol%, 0.6 mM) was prepared in a round-bottom flask equipped with a stir bar and cooled at -40°C in an acetonitrile frozen bath. 1 or 5 equiv. of 2-ethylhexanoic acid (or alternative carboxylic acid) were added directly to the solution. Then, the corresponding equivalents of a 7:1 (v:v) acetonitrile:hydrogen peroxide solution 30% were added by syringe pump over a period of 30 min. The solution was further stirred at -40°C for 30 minutes. At this point, 15 mL of an NaHCO<sub>3</sub> saturated aqueous solution was added to the mixture. The resultant solution was extracted with CH<sub>2</sub>Cl<sub>2</sub> (3 x 10 mL) and the combined organic fractions were dried over MgSO<sub>4</sub>. The solvent was removed under reduced pressure to afford the epoxide product. This residue was purified by flash column chromatography over silica gel (or neutral alumina) to obtain the pure epoxide.

#### 5) Characterization of isolated epoxide products

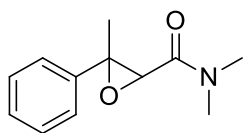

**E3**, purification by crystallization (CH<sub>2</sub>Cl<sub>2</sub>:hexane) gave the product as a white solid (94.5 mg, 72% yield, 94% ee). <sup>1</sup>H-NMR (CDCl<sub>3</sub>, 400 MHz, 300K) δ, ppm: 7.43 - 7.31 (m, 5H), 3.52 (s, 1H), 3.09 (s, 3H), 2.99 (s, 3H), 1.69 (s, 3H). <sup>13</sup>C-NMR (100 MHz, CDCl<sub>3</sub>) δ ppm: 166.3, 140.4, 128.6, 128.0, 125.1, 63.5, 61.3, 36.2, 35.2, 17.8. HRMS (ESI-MS) *m/z* calculated for C<sub>12</sub>H<sub>15</sub>NNaO<sub>2</sub> [M+Na]<sup>+</sup>: 228.0995, found: 228.1008.

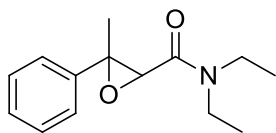

**E4**, purification by flash chromatography (neutral alumina; hexane:AcOEt 8:2) gave the product as a white solid (108.3 mg, 78% yield, 84:16 **E:Z**, 96% ee major isomer).  $^1\text{H-NMR}$  ( $\text{CDCl}_3$ , 300 MHz, 300K)  $\delta$ , ppm: 7.43-7.31 (m, 5H), 3.58-3.44 (m, 2H), 3.42-3.35 (m, 3H), 1.68 (s, 1H), 1.20 (dt,  $J = 10.4, 7.1$  Hz, 6H).  $^{13}\text{C-NMR}$  (101 MHz,  $\text{CDCl}_3$ )  $\delta$  ppm: 165.5, 140.6, 128.6, 127.9, 125.1, 63.2, 61.3, 41.0, 40.0, 17.7, 14.4, 13.0. HRMS (ESI-MS)  $m/z$  calculated for  $\text{C}_{14}\text{H}_{20}\text{NO}_2$   $[\text{M}+\text{H}]^+$ : 234.1489, found: 234.1483.

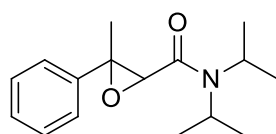

**E5**, purification by flash chromatography (silica-gel; hexane:AcOEt 9:1) gave the product as a pale yellow solid (110.4 mg, 87% yield, 97% ee).  $^1\text{H-NMR}$  ( $\text{CDCl}_3$ , 300 MHz, 300K)  $\delta$ , ppm: 7.39-7.31 (m, 5H), 4.10 (hept,  $J = 6.7$  Hz, 1H), 3.49 (hept,  $J = 6.8$  Hz, 1H), 3.42 (s, 1H), 1.67 (s, 3H), 1.45 (t,  $J = 6.5$  Hz, 6H), 1.27 (dd,  $J = 6.7, 1.2$  Hz, 3H), 1.18 (dd,  $J = 6.6, 1.2$  Hz, 3H).  $^{13}\text{C-NMR}$  (75 MHz,  $\text{CDCl}_3$ )  $\delta$  ppm: 165.0, 140.7, 128.6, 127.9, 125.0, 64.1, 61.3, 48.0, 46.0, 21.1, 20.9, 20.7, 20.2, 17.9. HRMS (ESI-MS)  $m/z$  calculated for  $\text{C}_{16}\text{H}_{23}\text{NNaO}_2$   $[\text{M}+\text{Na}]^+$ : 284.1621, found: 284.1616.

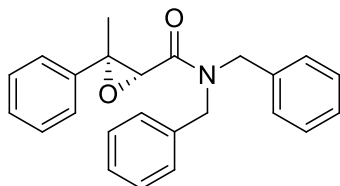

**E6**, purification by flash chromatography (silica-gel; hexane:AcOEt 8:2) gave the product as a white solid (84.9 mg, 90% yield, 99% ee).  $^1\text{H-NMR}$  ( $\text{CDCl}_3$ , 300 MHz, 300K)  $\delta$ , ppm: 7.37-7.24 (m, 13H), 7.15-7.13 (m, 2H), 4.90 (d,  $J = 14.6$  Hz, 1H), 4.56-4.40 (m, 3H), 3.59 (s, 1H), 1.72 (s, 3H).  $^{13}\text{C-NMR}$  (75 MHz,  $\text{CDCl}_3$ )  $\delta$  ppm: 166.9, 140.1, 136.7, 135.8, 129.0, 128.8, 128.6, 128.5, 128.0, 128.0, 127.7, 126.9, 125.0, 63.1, 61.9, 48.9, 48.0, 17.9. HRMS (ESI-MS)  $m/z$  calculated for  $\text{C}_{24}\text{H}_{23}\text{NNaO}_2$   $[\text{M}+\text{Na}]^+$ : 380.1621, found: 380.1620.

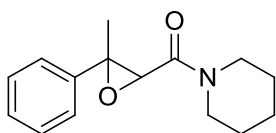

**E7**, isolated starting with 1 mmol of substrate. Purification by flash chromatography (silica-gel; hexane:AcOEt 1:1) gave the product as a white solid; (58.3 mg, 25% yield, 93% ee).  $^1\text{H-NMR}$  ( $\text{CDCl}_3$ , 300 MHz, 300K)  $\delta$ , ppm:  $\delta$  7.43-7.31 (m, 5H), 3.67-3.52 (m, 2H), 3.51-3.44 (m, 3H), 1.74-1.67 (m, 6H), 1.65-1.53 (m, 4H).  $^{13}\text{C-NMR}$  (75 MHz,  $\text{CDCl}_3$ )  $\delta$  ppm: 164.6, 140.5, 128.6, 127.9, 125.0, 63.6, 61.2, 45.8, 42.9, 26.6, 25.6, 24.5, 18.0. HRMS (ESI-MS)  $m/z$  calculated for  $\text{C}_{15}\text{H}_{19}\text{NNaO}_2$   $[\text{M}+\text{Na}]^+$ : 268.1308, found: 268.1317.

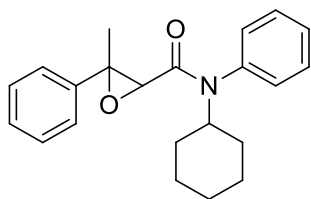

**E9**, purification by flash chromatography (neutral alumina; hexane:AcOEt 9:1) gave the product as a white solid (96.3 mg, 83% yield, 84% ee).  $^1\text{H-NMR}$  ( $\text{CDCl}_3$ , 300 MHz, 300K)  $\delta$ , ppm: 7.39-7.31 (m, 3H), 7.17-7.12 (m, 5H), 6.92-6.89 (m, 2H), 4.65

(tt,  $J = 12.1, 3.7$  Hz, 1H), 3.05 (s, 1H), 1.91-1.85 (m, 2H), 1.77-1.73 (m, 2H), 1.67 (s, 3H), 1.59 (d,  $J = 13.1$  Hz, 1H), 1.45-1.40 (m, 2H), 1.12 (qt,  $J = 12.6, 3.8$  Hz, 2H), 0.93 (qt,  $J = 13.1, 3.7$  Hz, 1H).  $^{13}\text{C-NMR}$  (75 MHz,  $\text{CDCl}_3$ )  $\delta$  ppm: 165.5, 140.4, 137.3, 130.3, 129.5, 128.7, 128.0, 127.6, 125.0, 63.3, 62.0, 54.6, 31.6, 31.3, 25.7, 25.7, 25.3, 17.73. HRMS (ESI-MS)  $m/z$  calculated for  $\text{C}_{22}\text{H}_{26}\text{NO}_2$   $[\text{M}+\text{H}]^+$ : 336.1958, found: 336.1949.

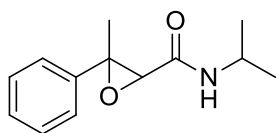

**E10**, purification by flash chromatography (silica gel; hexane:AcOEt 3:1) gave the product as a white solid (90.0 mg, 78% yield, 89% ee).  $^1\text{H-NMR}$  ( $\text{CDCl}_3$ , 300 MHz, 300K)  $\delta$ , ppm:

7.37-7.28 (m, 5H), 6.12 (d,  $J = 6.5$  Hz, 1H), 4.18 (dhept,  $J = 8.2, 6.5$  Hz, 1H), 3.42 (s, 1H), 1.70 (s, 3H), 1.21 (dd,  $J = 6.6, 3.4$  Hz, 6H).  $^{13}\text{C-NMR}$  (75 MHz,  $\text{CDCl}_3$ )  $\delta$  ppm: 165.9, 140.4, 128.5, 128.1, 125.2, 63.7, 63.0, 41.1, 22.8, 22.6, 17.4. HRMS (ESI-MS)  $m/z$  calculated for  $\text{C}_{13}\text{H}_{17}\text{NNaO}_2$   $[\text{M}+\text{Na}]^+$ : 242.1151, found: 242.1145.

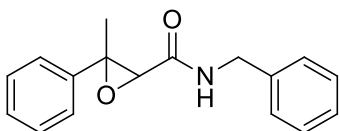

**E11**, purification by flash chromatography (silica-gel; hexane:AcOEt 3:1) gave the product as a white solid (72.1 mg, 62% yield, 92% ee).  $^1\text{H-NMR}$  ( $\text{CDCl}_3$ , 300 MHz, 300K)  $\delta$ ,

ppm: 7.38-7.28 (m, 10H), 6.60 (s, 1H), 4.52 (qd,  $J = 14.6, 6.0$  Hz, 2H), 3.50 (s, 1H), 1.68 (s, 3H).  $^{13}\text{C-NMR}$  (75 MHz,  $\text{CDCl}_3$ )  $\delta$  ppm: 166.8, 140.2, 137.6, 128.8, 128.5, 128.1, 128.0, 127.8, 125.2, 63.7, 63.2, 43.1, 17.6. HRMS (ESI-MS)  $m/z$  calculated for HRMS (ESI-MS)  $m/z$  calculated for  $\text{C}_{17}\text{H}_{18}\text{NO}_2$   $[\text{M}+\text{H}]^+$ : 268.1332, found: 268.1353.

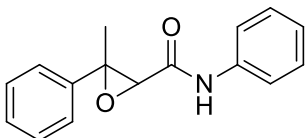

**E12**, purification by flash chromatography (silica-gel; hexane:AcOEt 7:3) gave the product as a pale pink solid (100.9 mg, 57% yield, 90% ee).  $^1\text{H-NMR}$  ( $\text{CDCl}_3$ , 300 MHz, 300K)  $\delta$ ,

ppm: 8.03 (s, 1H), 7.65-7.62 (m, 2H), 7.44-7.34 (m, 7H), 7.22-7.17 (m, 1H), 3.62 (s, 1H), 1.81 (s, 3H).  $^{13}\text{C-NMR}$  (101 MHz,  $\text{CDCl}_3$ )  $\delta$  ppm: 164.9, 140.0, 136.6, 129.2, 128.6, 128.3, 125.3, 124.9, 119.8, 63.9, 63.8, 17.7. HRMS (ESI-MS)  $m/z$  calculated for  $\text{C}_{16}\text{H}_{15}\text{NNaO}_2$   $[\text{M}+\text{Na}]^+$ : 276.0995, found: 276.100.

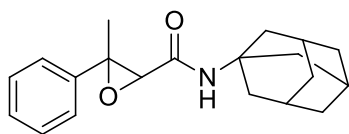

**E13**, purification by flash chromatography (silica-gel; hexane:AcOEt 8:2) gave the product as a white solid (62.3 mg, 30% yield, 82% ee).  $^1\text{H-NMR}$  ( $\text{CDCl}_3$ , 300 MHz, 300K)  $\delta$ , ppm: 7.38-7.30 (m, 5H), 5.98 (s, 1H), 3.36 (s, 1H), 2.14-2.11 (m, 3H), 2.07 (s, 6H), 1.74 (s, 3H), 173-1.72 (m, 6H).  $^{13}\text{C-NMR}$  (75 MHz,  $\text{CDCl}_3$ )  $\delta$  ppm: 165.8, 140.6, 128.5, 128.0, 125.2, 63.9, 63.0, 52.1, 41.6, 36.3, 29.4, 17.4. HRMS (ESI-MS)  $m/z$  calculated for  $\text{C}_{20}\text{H}_{25}\text{NNaO}_2$   $[\text{M}+\text{Na}]^+$ : 334.1778, found: 334.1787.

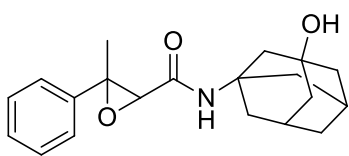

**E013**, purification by flash chromatography (silica-gel; hexane:AcOEt 8:2) gave the product as a white solid (90.0 mg, 43% yield, 84% ee).  $^1\text{H-NMR}$  ( $\text{CDCl}_3$ , 300 MHz, 300K)  $\delta$ , ppm: 7.37-7.30 (m, 5H), 6.07 (s, 1H), 3.36 (s, 1H), 2.33-2.31 (m, 2H), 2.11-2.04 (m, 2H), 2.01-1.94 (m, 4H), 1.77-1.70 (m, 9H), 1.65-1.55 (m, 2H).  $^{13}\text{C-NMR}$  (75 MHz,  $\text{CDCl}_3$ )  $\delta$  ppm: 165.9, 140.4, 128.5, 128.1, 125.2, 69.1, 63.8, 63.1, 54.5, 49.0, 44.0, 40.3, 40.2, 34.8, 30.6, 17.4. HRMS (ESI-MS)  $m/z$  calculated for  $\text{C}_{20}\text{H}_{25}\text{NNaO}_3$   $[\text{M}+\text{Na}]^+$ : 350.1727, found: 350.1727.

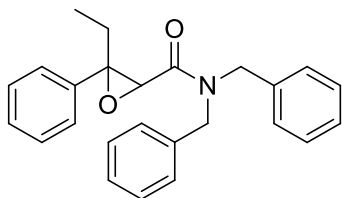

**E14**, purification by flash chromatography (silica-gel; hexane:AcOEt 8:2) gave the product as a colourless oil (101.47 mg, 84% yield, 99% ee).  $^1\text{H-NMR}$  ( $\text{CDCl}_3$ , 300 MHz, 300K)  $\delta$ , ppm: 7.41-7.26 (m, 13H), 7.19-7.17 (m, 2H), 4.91 (d,  $J = 14.6$  Hz, 1H), 4.61 (d,  $J = 16.6$  Hz, 1H), 4.49 (d,  $J = 16.6$  Hz, 1H), 4.41 (d,  $J = 14.6$  Hz, 1H), 3.60 (s, 1H), 2.21 (dq,  $J = 14.9, 7.5$  Hz, 1H), 1.81 (dq,  $J = 14.6, 7.3$  Hz, 1H), 0.97 (t,  $J = 7.4$  Hz, 3H).  $^{13}\text{C-NMR}$  (75 MHz,  $\text{CDCl}_3$ )  $\delta$  ppm: 166.9, 138.4, 136.7, 135.8, 129.0, 128.7, 128.6, 128.5, 127.9, 127.8, 127.7, 126.9, 125.7, 66.4, 63.4, 48.9, 47.9, 24.6, 9.4. HRMS (ESI-MS)  $m/z$  calculated for  $\text{C}_{25}\text{H}_{25}\text{NNaO}_2$   $[\text{M}+\text{Na}]^+$ : 394.1778, found: 394.1775.

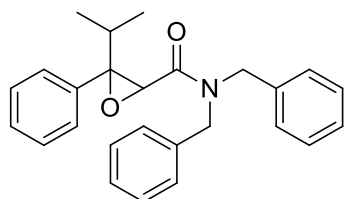

**E15**, purification by flash chromatography (silica-gel; hexane:AcOEt 8:2) gave the product as a colourless oil (94.4 mg, 33% yield, 85% ee).  $^1\text{H-NMR}$  ( $\text{CDCl}_3$ , 300 MHz, 300K)  $\delta$ , ppm: 7.40-7.26 (m, 15H), 5.17 (d,  $J = 14.5$  Hz, 1H), 4.86 (d,  $J = 16.5$  Hz, 1H), 4.55 (d,  $J = 16.5$  Hz, 1H), 4.17 (d,  $J = 14.5$  Hz, 1H), 3.73 (s, 1H), 2.07 (hept,  $J = 6.8$  Hz, 1H), 1.02 (dd,  $J = 6.9, 5.8$  Hz, 6H).  $^{13}\text{C-NMR}$

NMR (75 MHz, CDCl<sub>3</sub>)  $\delta$  ppm: 167.0, 136.8, 136.7, 135.8, 129.1, 128.7, 128.7, 128.0, 127.9, 127.8, 127.8, 127.7, 127.0, 70.2, 61.9, 49.1, 47.8, 31.7, 19.3, 18.3. HRMS (ESI-MS)  $m/z$  calculated for C<sub>26</sub>H<sub>27</sub>NNaO<sub>2</sub> [M+Na]<sup>+</sup>: 408.1934, found: 408.1927.

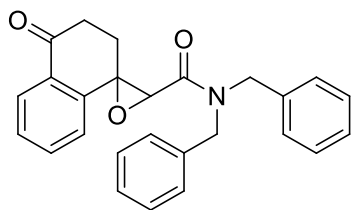

**E16**, purification by flash chromatography (silica-gel; hexane:AcOEt 8:2) gave the product as a white solid (65.1 mg, 62% yield, 91% ee). <sup>1</sup>H-NMR (CDCl<sub>3</sub>, 300 MHz, 300K)  $\delta$ , ppm: 8.05 (dd,  $J$  = 7.8, 1.3 Hz, 1H), 7.59 (td,  $J$  = 7.6, 1.4 Hz, 1H), 7.46 (td,  $J$  = 7.6, 1.3 Hz, 1H), 7.37-7.31 (m, 6H), 7.28-7.26 (m, 3H), 7.18-7.15 (m, 2H), 5.03 (d,  $J$  = 14.5 Hz, 1H), 4.62 (d,  $J$  = 16.4 Hz, 1H), 4.47 (d,  $J$  = 16.4 Hz, 1H), 4.33 (d,  $J$  = 14.5 Hz, 1H), 3.78 (s, 1H), 2.82-2.81 (m, 1H), 2.66-2.62 (m, 2H), 2.20-2.18 (m, 1H). <sup>13</sup>C-

NMR (75 MHz, CDCl<sub>3</sub>)  $\delta$  ppm: 196.0, 165.9, 141.0, 136.5, 135.6, 134.4, 133.2, 129.1, 128.9, 128.85, 128.5, 128.2, 128.0, 127.3, 127.0, 123.0, 64.1, 61.1, 49.4, 48.4, 36.8, 26.9. HRMS (ESI-MS)  $m/z$  calculated for C<sub>26</sub>H<sub>23</sub>NNaO<sub>3</sub> [M+Na]<sup>+</sup>: 420.1570, found: 420.1570.

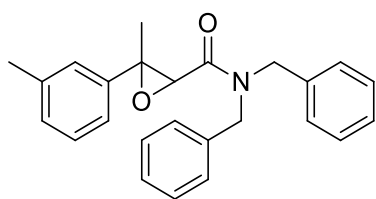

**E18**, purification by flash chromatography (silica-gel; hexane:AcOEt 8:2) gave the product as a colourless oil (63.8 mg, 64% yield, 98% ee). <sup>1</sup>H-NMR (CDCl<sub>3</sub>, 300 MHz, 300K)  $\delta$ , ppm: 7.39-7.33 (m, 6H), 7.29 (dd,  $J$  = 6.1, 1.9 Hz, 2H), 7.23-7.17 (m, 3H), 7.11-7.08 (m, 3H), 4.92 (d,  $J$  = 14.6 Hz, 1H), 4.52 (dt,  $J$  = 30.6, 15.5 Hz, 3H), 3.62 (s, 1H), 2.34 (s, 3H), 1.74 (s, 3H). <sup>13</sup>C-NMR (75 MHz, CDCl<sub>3</sub>)  $\delta$  ppm: 166.9, 140.1, 138.2, 136.8, 135.9, 129.0, 128.8, 128.6, 128.4, 127.9, 127.7, 126.9, 125.6, 122.1, 63.0, 62.0, 48.9, 48.0, 21.4, 18.0. HRMS (ESI-MS)  $m/z$  calculated for C<sub>25</sub>H<sub>25</sub>NNaO<sub>2</sub> [M+Na]<sup>+</sup>: 394.1778, found: 394.1764.

<sup>13</sup>C-NMR (75 MHz, CDCl<sub>3</sub>)  $\delta$  ppm: 166.9, 140.1, 138.2, 136.8, 135.9, 129.0, 128.8, 128.6, 128.4, 127.9, 127.7, 126.9, 125.6, 122.1, 63.0, 62.0, 48.9, 48.0, 21.4, 18.0. HRMS (ESI-MS)  $m/z$  calculated for C<sub>25</sub>H<sub>25</sub>NNaO<sub>2</sub> [M+Na]<sup>+</sup>: 394.1778, found: 394.1764.

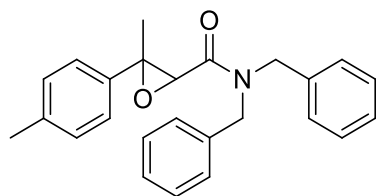

**E19**, purification by flash chromatography (silica-gel; hexane:AcOEt 8:2) gave the product as a colourless oil (62.3 mg, 74% yield, 99% ee). <sup>1</sup>H-NMR (CDCl<sub>3</sub>, 300 MHz, 300K)  $\delta$ , ppm: 7.42-7.30 (m, 6H), 7.27 (d,  $J$  = 6.3 Hz, 2H), 7.21-7.10 (m, 6H), 4.92 (d,  $J$  = 14.6 Hz, 1H), 4.56 (d,  $J$  = 16.6 Hz, 1H), 4.47 (d,  $J$  = 16.6 Hz, 1H), 4.42 (d,  $J$  = 14.6 Hz, 1H), 3.61 (s, 1H), 2.34 (s, 3H), 1.73 (s, 3H). <sup>13</sup>C-NMR (75 MHz, CDCl<sub>3</sub>)  $\delta$  ppm: 166.96, 137.78, 137.19, 136.74, 135.82, 129.18, 129.01, 128.72, 128.59,

<sup>13</sup>C-NMR (75 MHz, CDCl<sub>3</sub>)  $\delta$  ppm: 166.96, 137.78, 137.19, 136.74, 135.82, 129.18, 129.01, 128.72, 128.59,

127.93, 127.70, 126.87, 124.97, 63.16, 61.87, 48.87, 47.91, 21.08, 17.94. HRMS (ESI-MS)  $m/z$  calculated for  $C_{25}H_{25}NNaO_2$   $[M+Na]^+$ : 394.1778, found: 394.1765.

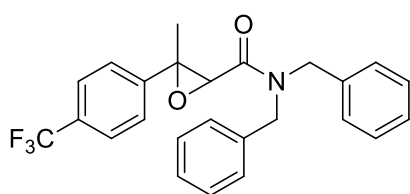

**E20**, purification by flash chromatography (silica-gel; hexane:AcOEt 9:1) gave the product as a colourless oil (73.3 mg, 65% yield, 98% ee).  $^1H$ -NMR ( $CDCl_3$ , 300 MHz, 300K)  $\delta$ , ppm: 7.57 (d,  $J$  = 8.3 Hz, 2H), 7.40-7.30

(m, 8H), 7.29 (dd,  $J$  = 5.3, 2.6 Hz, 2H), 7.17-7.15 (m, 2H), 4.83 (d,  $J$  = 14.5 Hz, 1H), 4.57-4.53 (m, 3H), 3.57 (s, 1H), 1.75 (s, 3H).  $^{13}C$ -NMR (75 MHz,  $CDCl_3$ )  $\delta$  ppm: 166.4, 144.1, 136.6, 135.8, 129.1, 128.8, 128.6, 128.0, 127.8, 126.7, 125.6, 125.5, 125.5, 62.9, 61.6, 49.1, 48.4, 17.7. HRMS (ESI-MS)  $m/z$  calculated for  $C_{25}H_{22}F_3NNaO_2$   $[M+Na]^+$ : 448.1495, found: 448.1482.

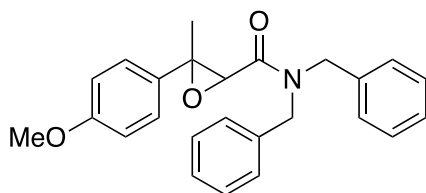

**E21**, purification by flash chromatography (silica-gel; hexane:AcOEt 7:3) gave the product as a clear oil (51.7 mg, 57% yield, 98% ee).  $^1H$ -NMR ( $CDCl_3$ , 300 MHz, 300K)  $\delta$ , ppm: 7.44-7.30 (m, 7H), 7.27-7.15 (m,

5H), 6.86-6.82 (m, 2H), 4.92 (d,  $J$  = 14.6 Hz, 1H), 4.58-4.39 (m, 3H), 3.80 (s, 3H), 3.60 (s, 1H), 1.71 (s, 3H).  $^{13}C$ -NMR (75 MHz,  $CDCl_3$ )  $\delta$  ppm: 167.0, 159.3, 136.7, 135.8, 132.1, 129.0, 128.7, 128.6, 127.0, 127.7, 126.8, 126.3, 113.9, 63.3, 61.7, 55.3, 48.9, 48.0, 17.9. HRMS (ESI-MS)  $m/z$  calculated for  $C_{25}H_{25}NNaO_3$   $[M+Na]^+$ : 410.1727, found: 410.1736.

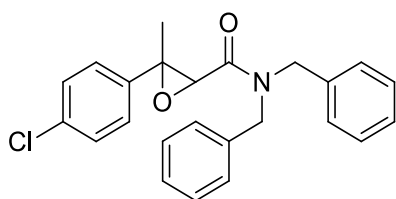

**E22**, purification by flash chromatography (neutral alumina; hexane:AcOEt 8:3) gave the product as a colourless oil (86.7 mg, 83% yield, 99% ee).  $^1H$ -NMR ( $CDCl_3$ , 300 MHz, 300K)  $\delta$ , ppm: 7.40-7.33 (m, 6H), 7.29-

7.27 (m, 4H), 7.19-7.15 (m, 4H), 4.85 (d,  $J$  = 14.6 Hz, 1H), 4.56-4.47 (m, 3H), 3.56 (s, 1H), 1.71 (s, 3H).  $^{13}C$ -NMR (75 MHz,  $CDCl_3$ )  $\delta$  ppm: 166.6, 138.7, 136.6, 135.9, 133.9, 129.1, 128.8, 128.7, 128.6, 128.0, 127.8, 126.7, 126.5, 63.1, 61.5, 49.0, 48.3, 17.8. HRMS (ESI-MS)  $m/z$  calculated for  $C_{24}H_{22}ClNNaO_2$   $[M+Na]^+$ : 414.1231, found: 414.1218.

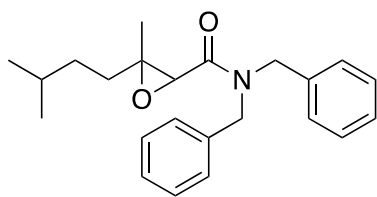

**E25**, purification by flash chromatography (silica-gel; hexane:AcOEt 9:1) gave the product as a clear oil (55.0 mg, 51% yield, 95% ee).  $^1\text{H-NMR}$  ( $\text{CDCl}_3$ , 300 MHz, 300K)  $\delta$ , ppm: 7.43-7.22 (m, 10H), 4.84 (d,  $J=14.6$  Hz, 2H), 4.58-

4.41 (m, 3H), 3.48 (s, 1H), 1.59-1.44 (m, 3H), 1.35 (s, 3H), 1.30-1.16 (m, 2H), 0.86 (td,  $J=6.6$ , 3.8 Hz, 6H).  $^{13}\text{C-NMR}$  (75 MHz,  $\text{CDCl}_3$ )  $\delta$  ppm: 167.9, 136.8, 136.1, 129.0, 128.7, 128.5, 127.9, 127.6, 126.9, 126.8, 62.9, 60.0, 49.0, 48.1, 35.3, 33.7, 28.0, 22.5, 17.3. HRMS (ESI-MS)  $m/z$  calculated for  $\text{C}_{23}\text{H}_{29}\text{NNaO}_2$   $[\text{M}+\text{Na}]^+$ : 374.2091, found: 374.2089.

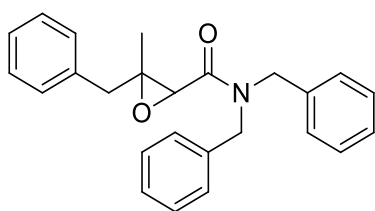

**E26**, isolated starting with 1.5 mmol of substrate. Purification by flash chromatography (silica-gel; hexane:AcOEt 9:1) gave the product as a white off solid (291.6 mg, 35% yield, 95% ee).  $^1\text{H-NMR}$  ( $\text{CDCl}_3$ , 300 MHz, 300K)  $\delta$ , ppm: 7.39-7.10 (m, 15H), 4.81 (d,  $J=14.7$  Hz, 1H),

4.47-4.30 (m, 3H), 3.40 (s, 1H), 2.93-2.80 (m, 2H), 1.34 (s, 3H).  $^{13}\text{C-NMR}$  (75 MHz,  $\text{CDCl}_3$ )  $\delta$  ppm: 167.6, 136.8, 135.9, 135.9, 129.6, 129.0, 128.7, 128.5, 128.5, 127.8, 127.6, 126.9, 126.7, 62.6, 59.0, 48.8, 47.9, 43.5, 17.5. HRMS (ESI-MS)  $m/z$  calculated for  $\text{C}_{25}\text{H}_{25}\text{NNaO}_2$   $[\text{M}+\text{Na}]^+$ : 394.1778, found: 394.1768.

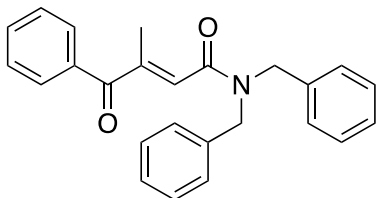

**K26**, isolated starting with 1.5 mmol of substrate. Purification by flash chromatography (silica-gel; hexane:AcOEt 9:1) gave the product as a white off solid (157.5 mg, 19% yield).  $^1\text{H-NMR}$  ( $\text{CDCl}_3$ , 300 MHz, 300K)

$\delta$ , ppm: 7.69-7.67 (m, 2H), 7.54-7.49 (m, 1H), 7.40-7.26 (m, 11H), 7.09-7.07 (m, 2H), 6.59 (d,  $J=1.4$  Hz, 1H), 4.64 (s, 2H), 4.38 (s, 2H), 2.23 (d,  $J=1.4$  Hz, 3H).  $^{13}\text{C-NMR}$  (75 MHz,  $\text{CDCl}_3$ )  $\delta$  ppm: 197.7, 167.3, 144.1, 136.7, 136.6, 135.8, 132.6, 131.1, 129.5, 129.0, 128.8, 128.5, 128.4, 127.9, 127.7, 126.8, 50.5, 47.4, 15.2. HRMS (ESI-MS)  $m/z$  calculated for  $\text{C}_{25}\text{H}_{24}\text{NO}_2$   $[\text{M}+\text{H}]^+$ : 370.1802, found: 370.1786.

## 6) Substrates and products characterization

### 6.1) $^1\text{H}$ and $^{13}\text{C}$ -NMR spectra of synthesized substrates

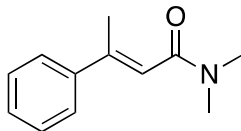

$^1\text{H}$ -NMR of **S3** in  $\text{CDCl}_3$

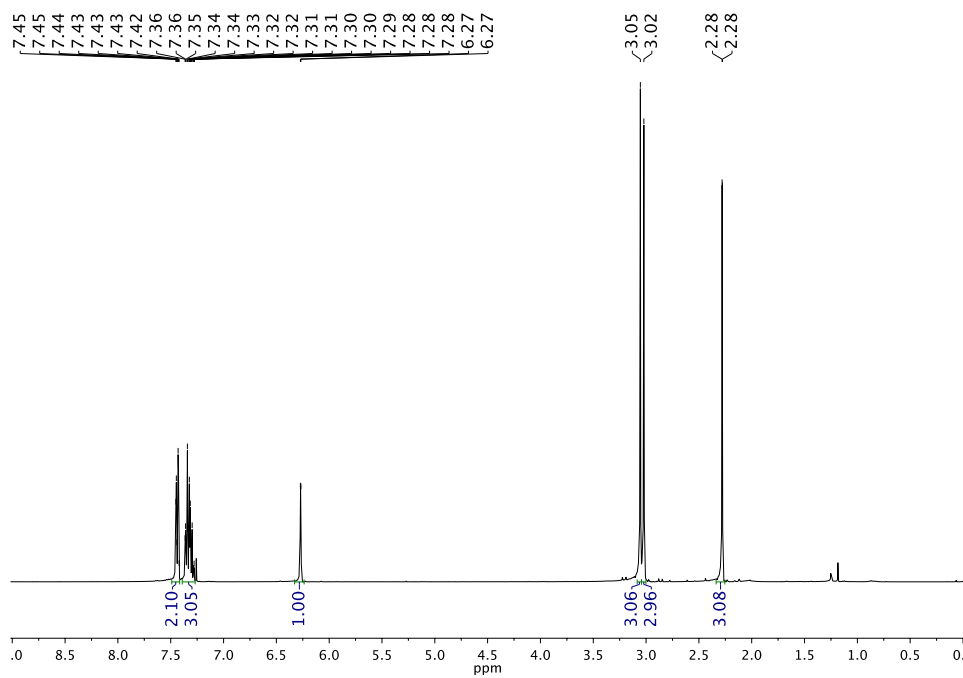

$^{13}\text{C}$ -NMR of **S3** in  $\text{CDCl}_3$

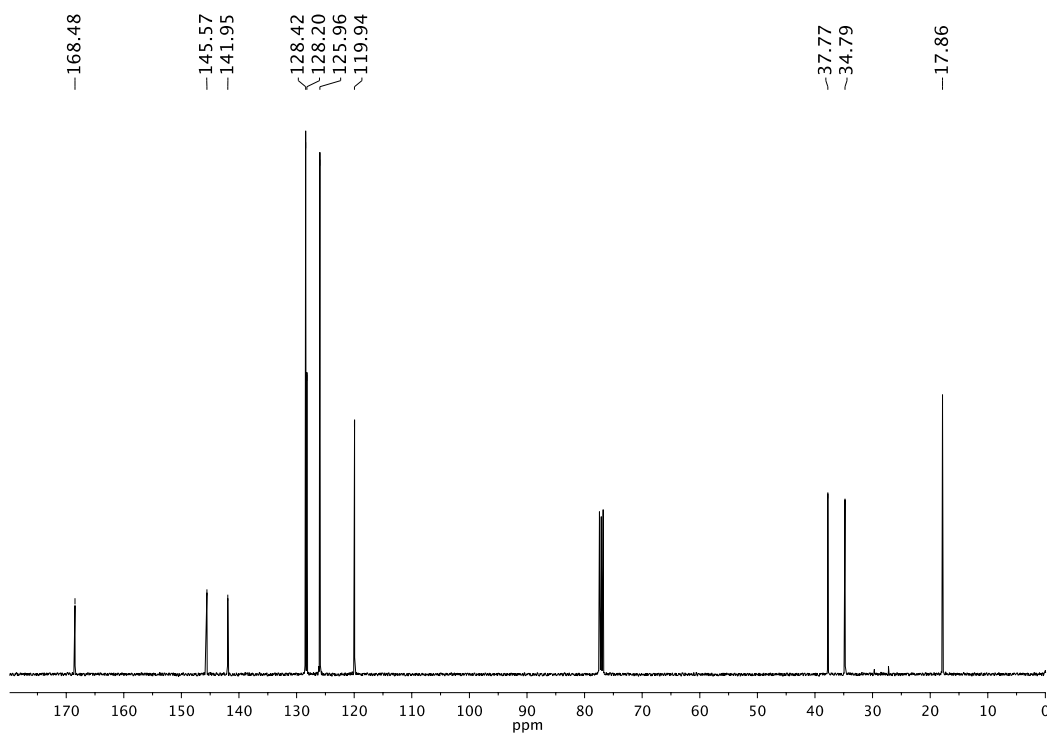

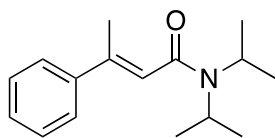

<sup>1</sup>H-NMR of **S5** in CDCl<sub>3</sub>

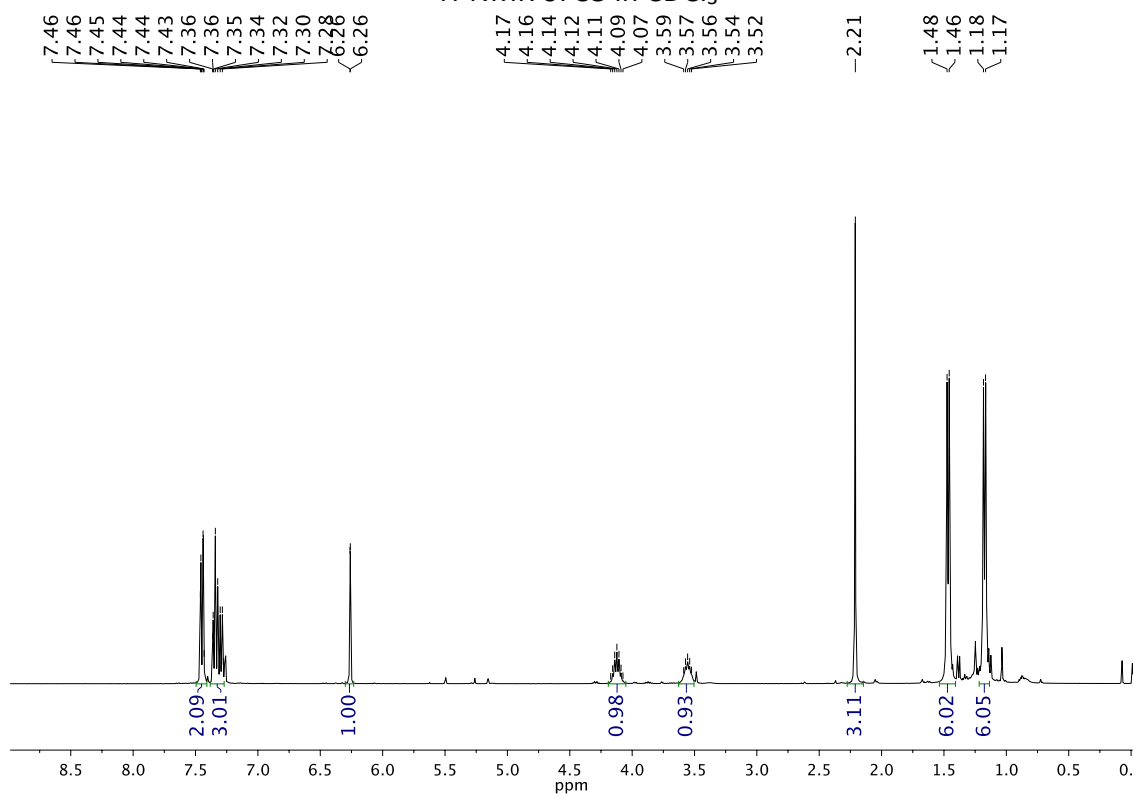

<sup>13</sup>C-NMR of **S5** in CDCl<sub>3</sub>

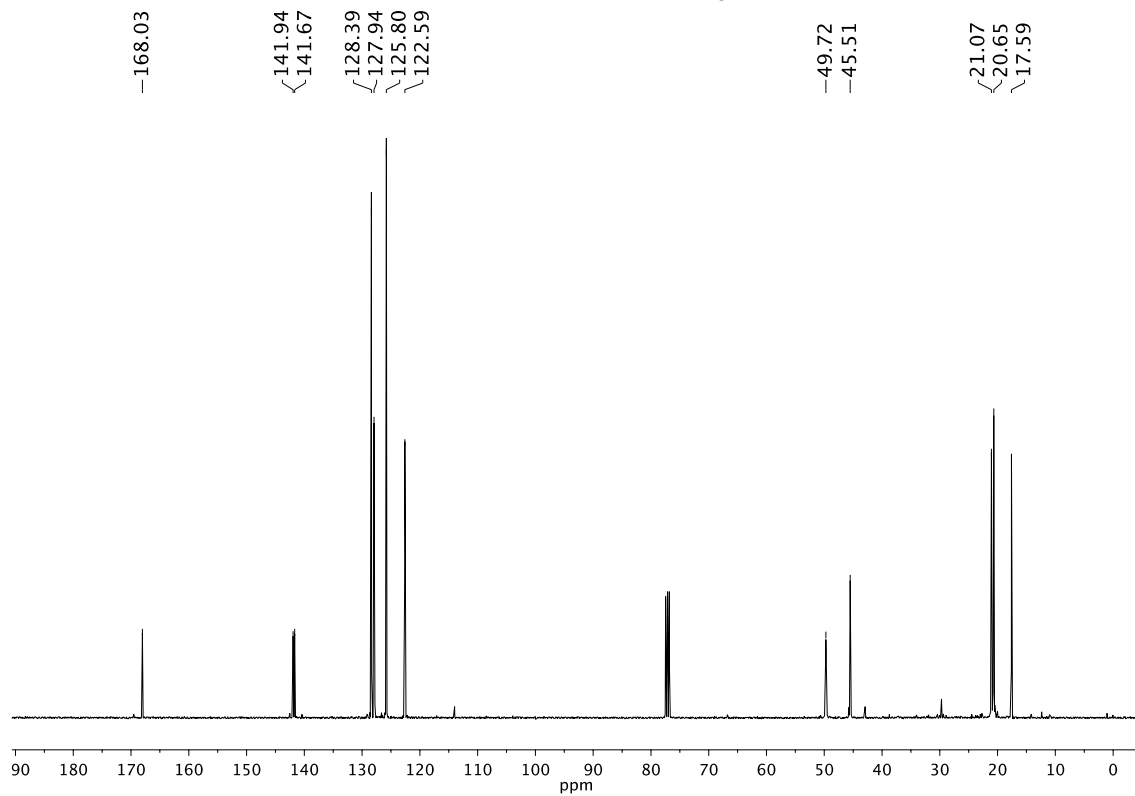

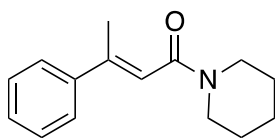

$^1\text{H-NMR}$  of **7** in  $\text{CDCl}_3$

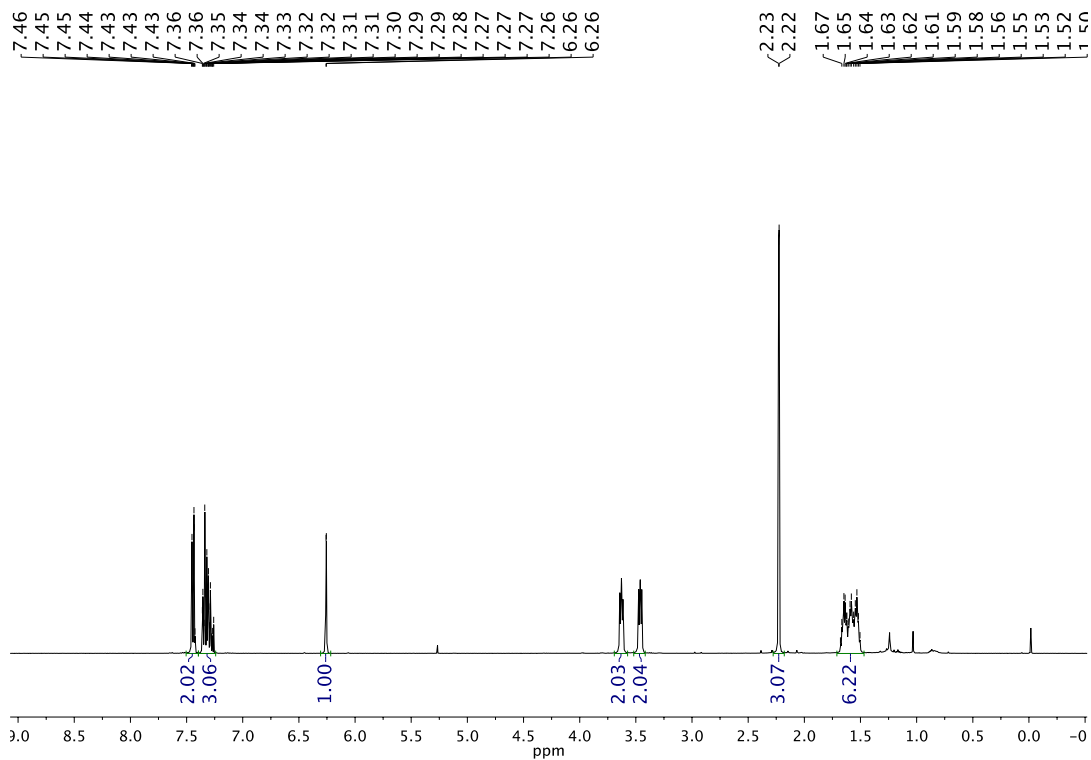

$^{13}\text{C-NMR}$  of **7** in  $\text{CDCl}_3$

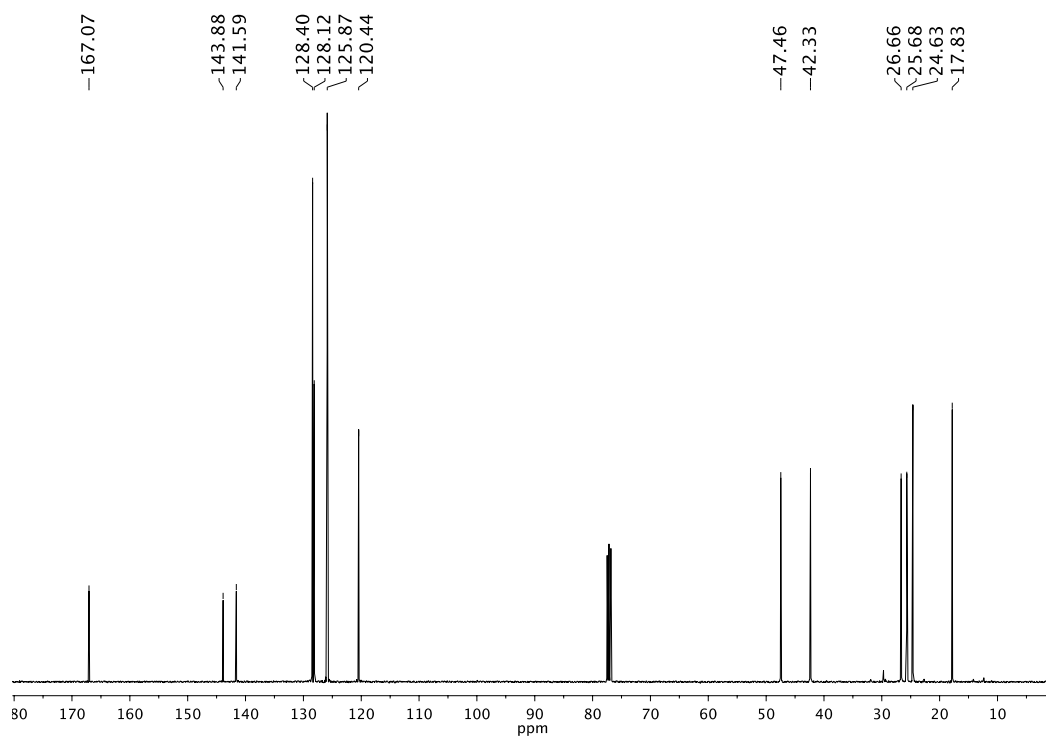

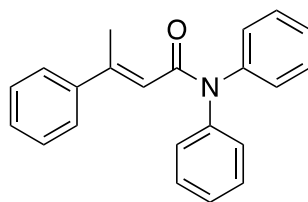

$^1\text{H-NMR}$  of **S8** in  $\text{CDCl}_3$

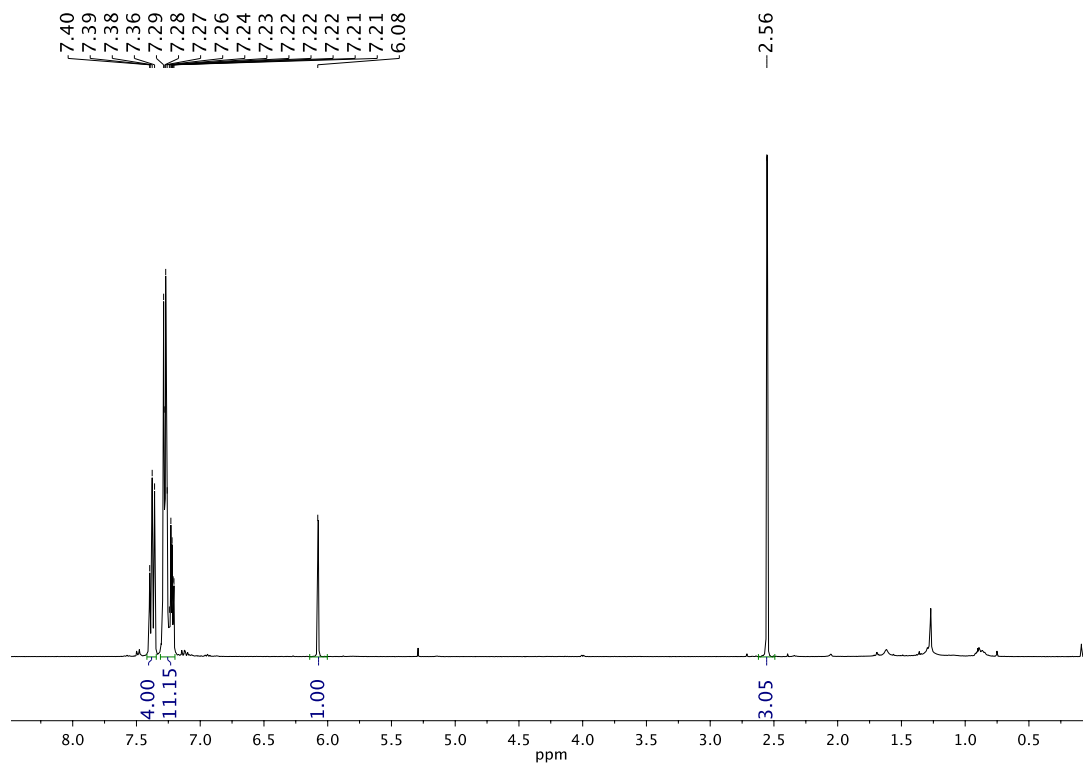

$^{13}\text{C-NMR}$  of **S8** in  $\text{CDCl}_3$

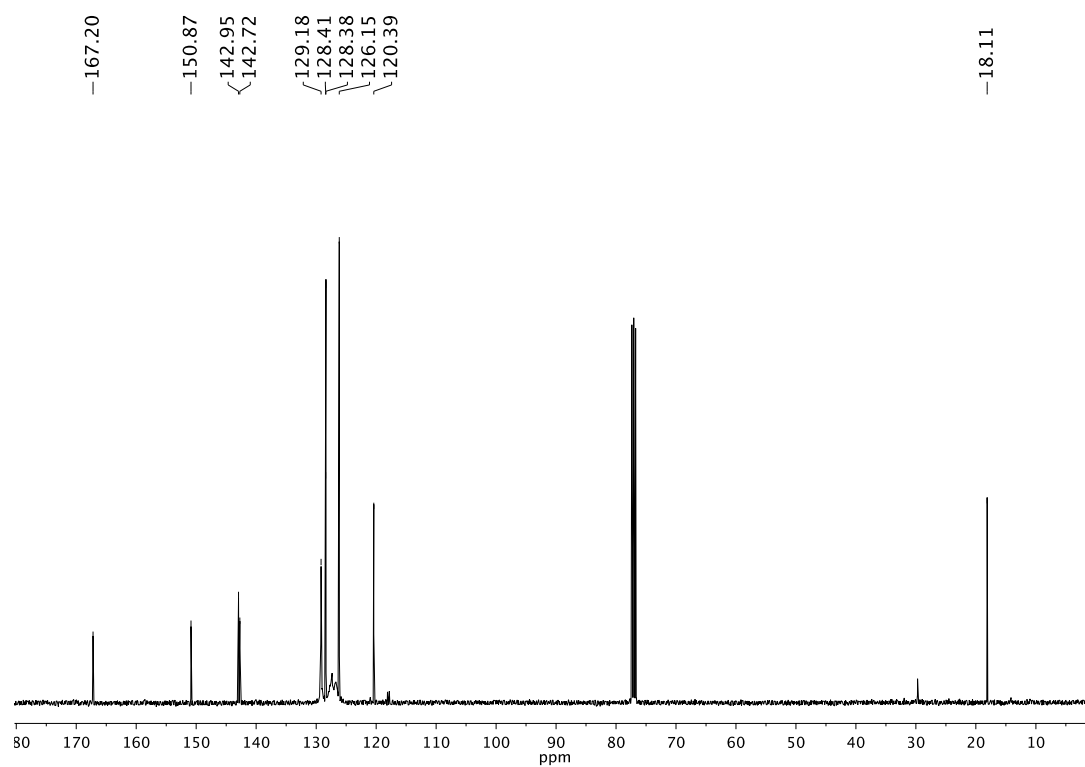

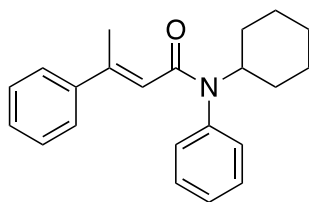

$^1\text{H-NMR}$  of **S9** in  $\text{CDCl}_3$

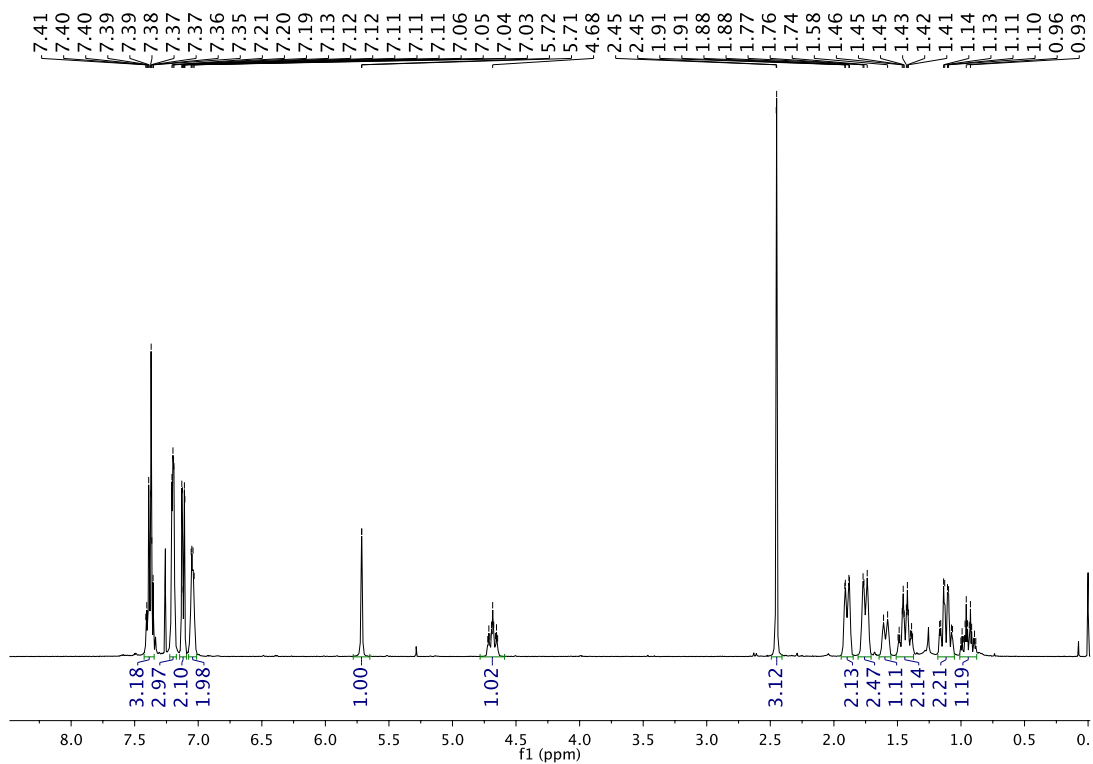

$^{13}\text{C-NMR}$  of **S9** in  $\text{CDCl}_3$

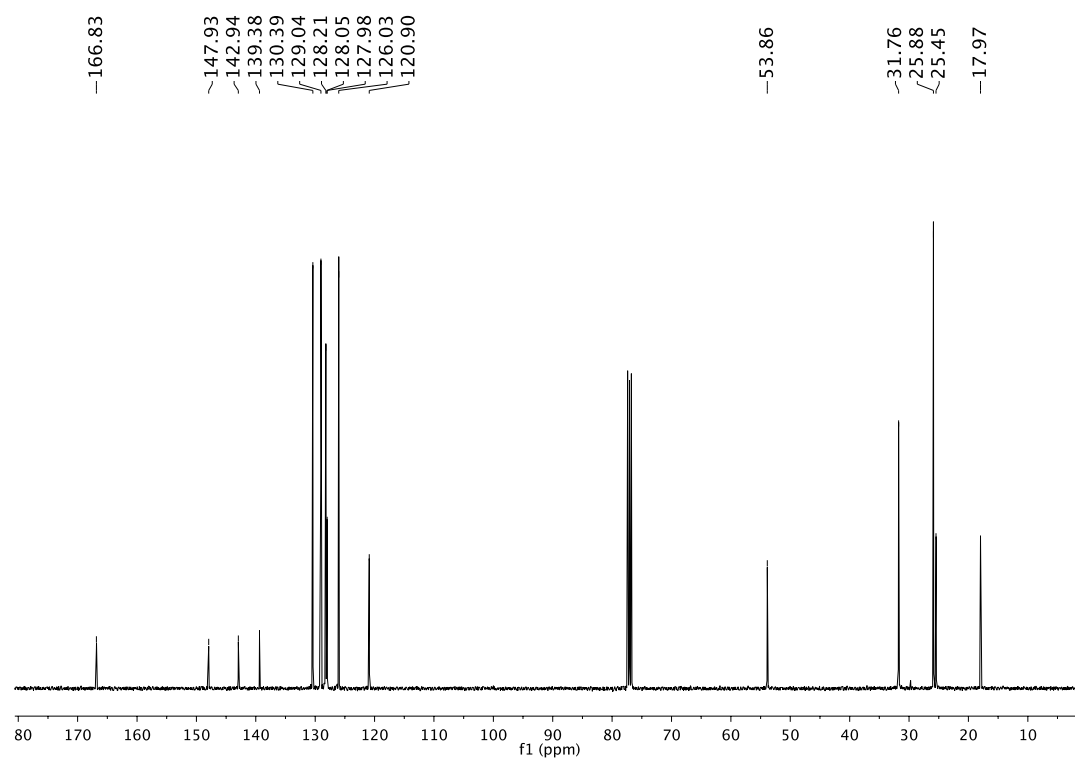

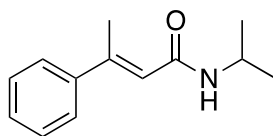

<sup>1</sup>H-NMR of **S10** in CDCl<sub>3</sub>

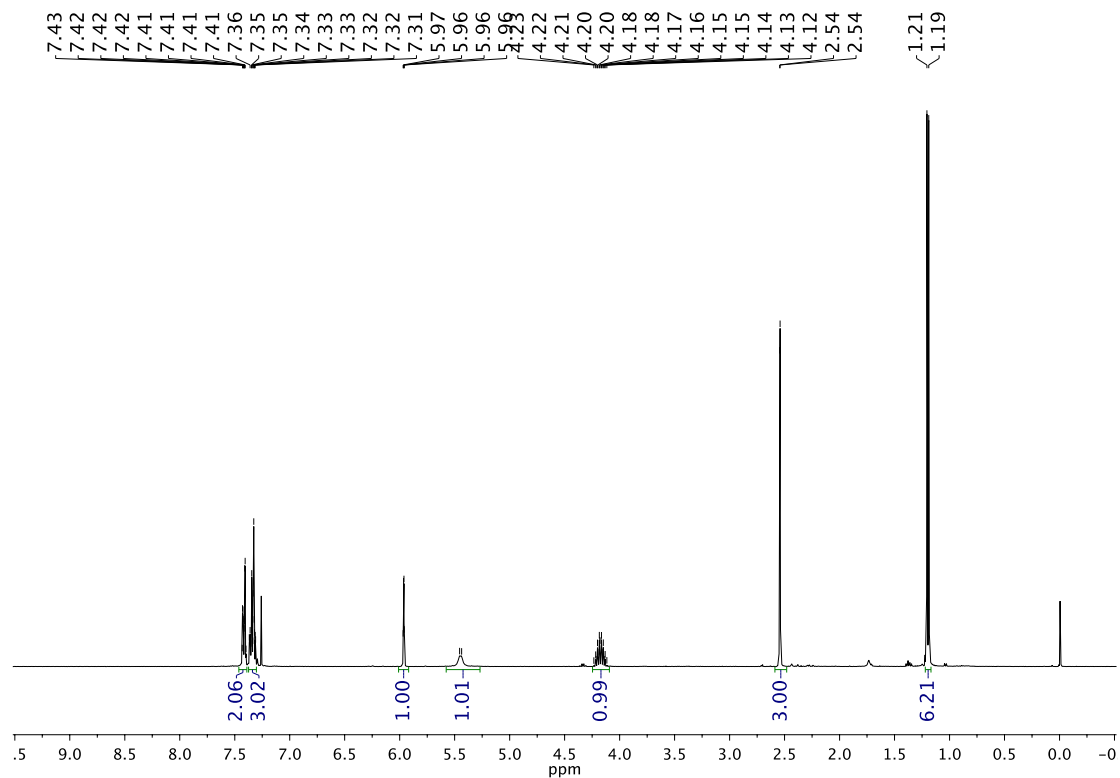

<sup>13</sup>C-NMR of **S10** in CDCl<sub>3</sub>

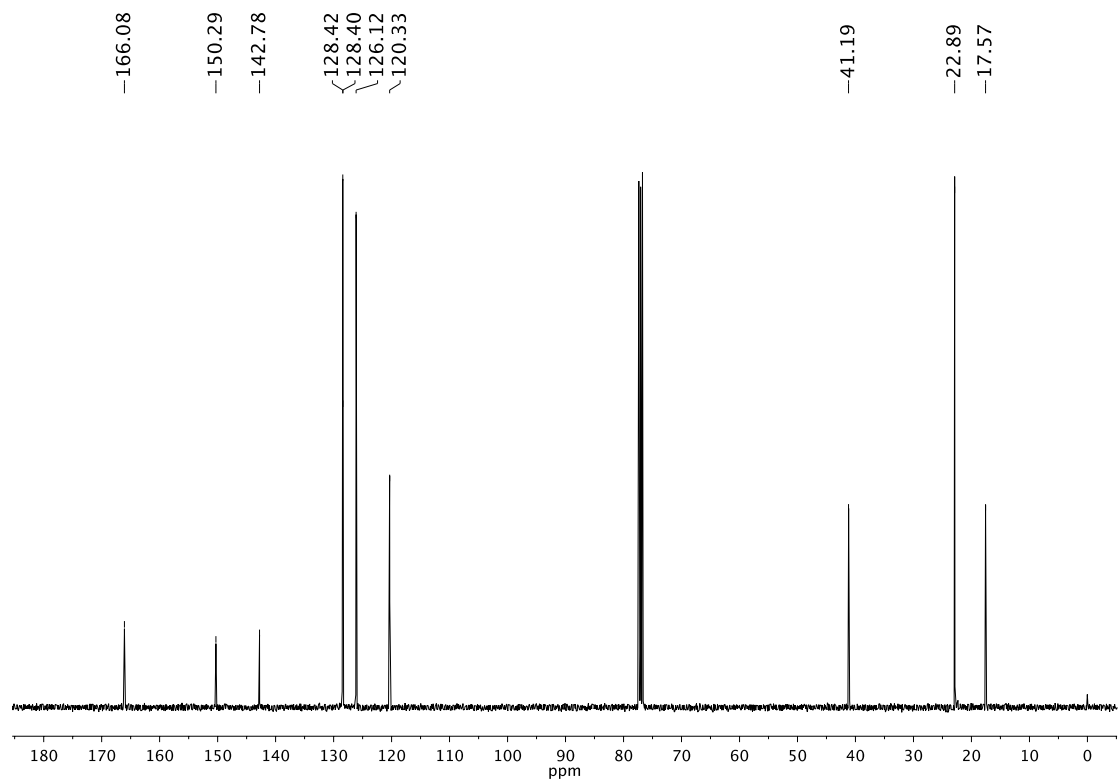

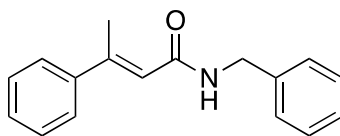

<sup>1</sup>H-NMR of **S11** in CDCl<sub>3</sub>

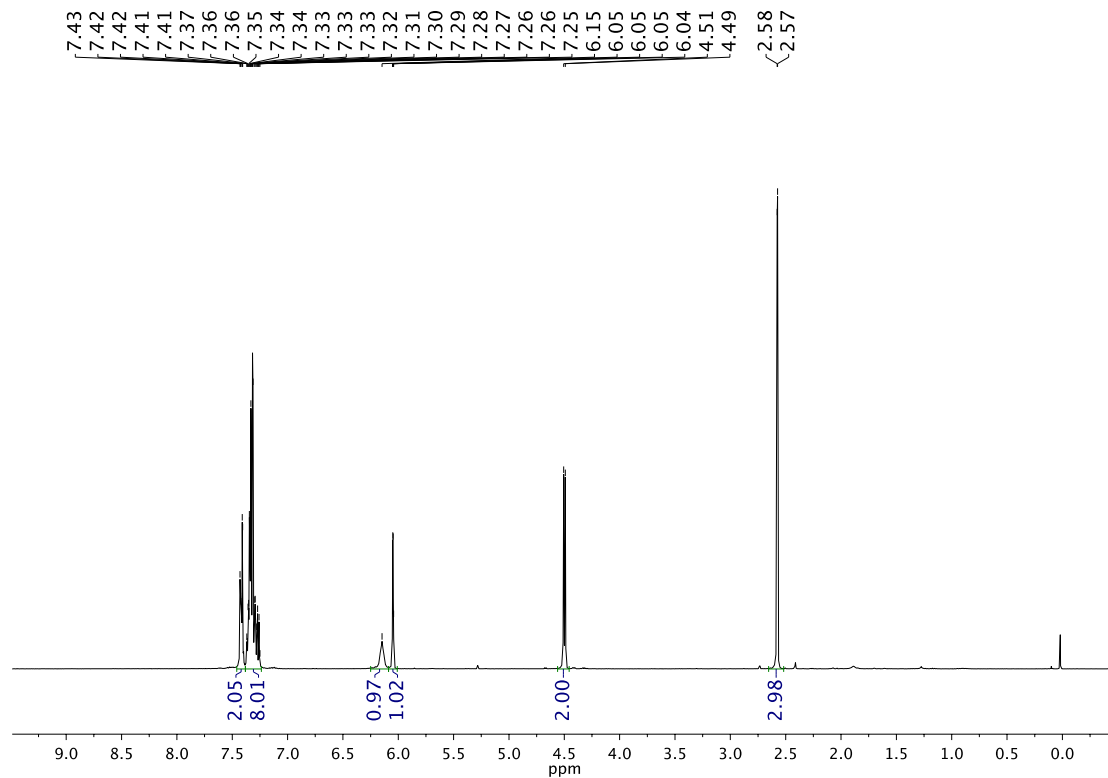

<sup>13</sup>C-NMR of **S11** in CDCl<sub>3</sub>

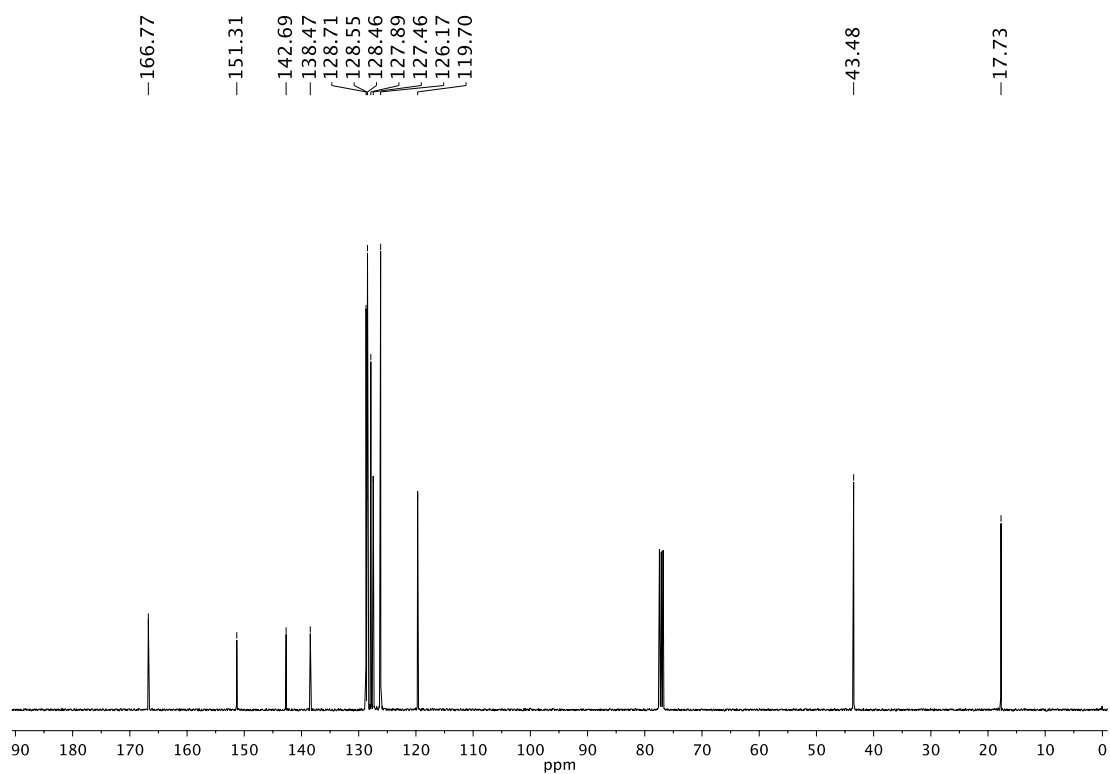

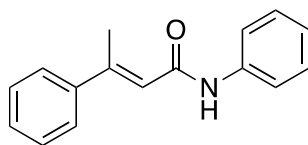

<sup>1</sup>H-NMR of **S12** in CDCl<sub>3</sub>

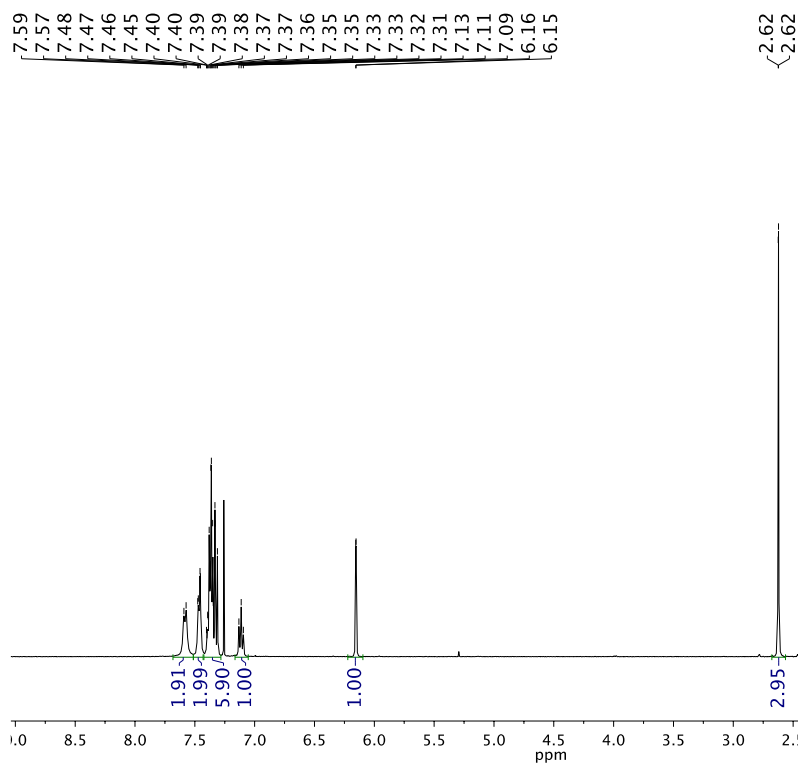

<sup>13</sup>C-NMR of **S12** in CDCl<sub>3</sub>

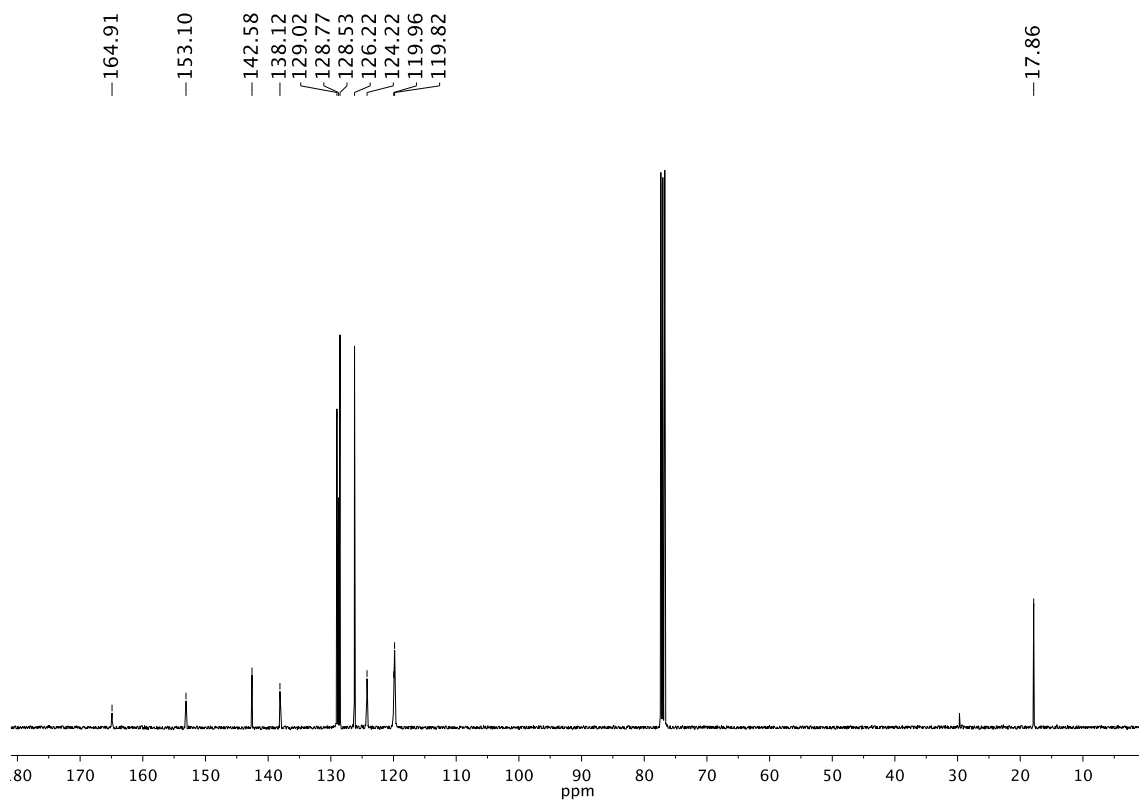

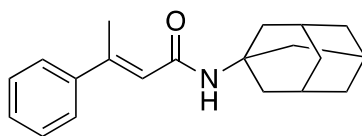

$^1\text{H}$ -NMR of **S13** in  $\text{CDCl}_3$

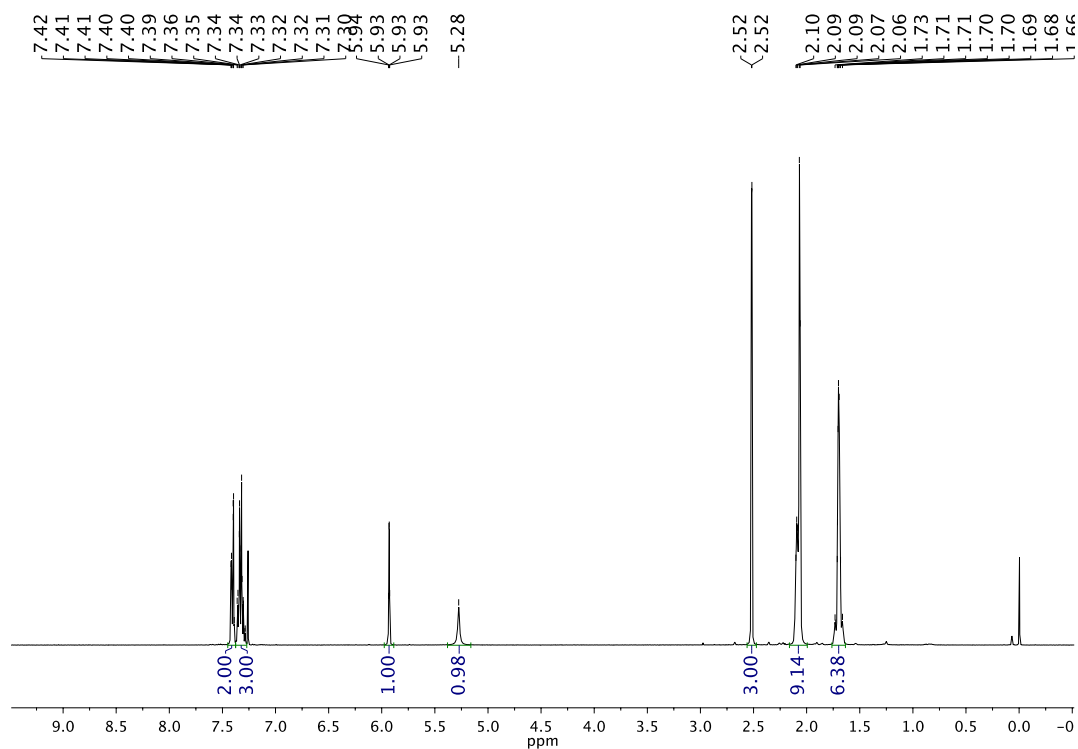

$^{13}\text{C}$ -NMR of **S13** in  $\text{CDCl}_3$

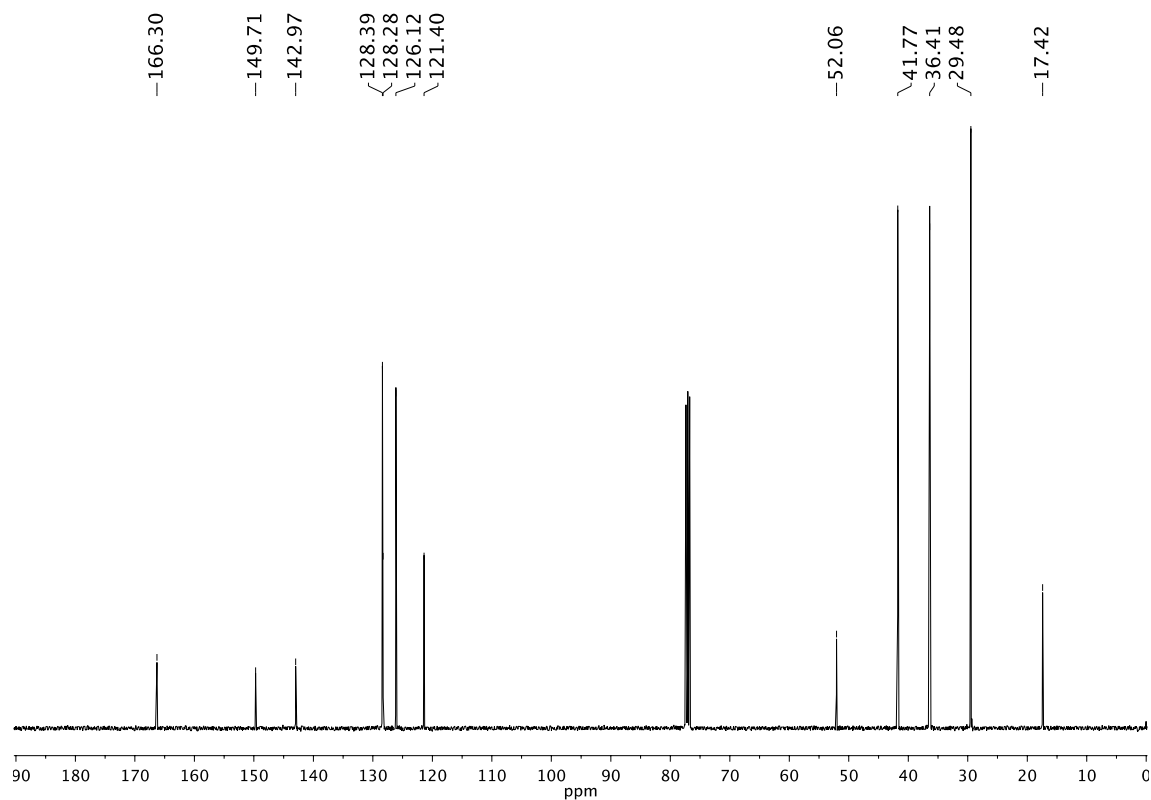

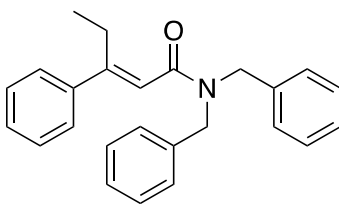

$^1\text{H-NMR}$  of **S14** in  $\text{CDCl}_3$

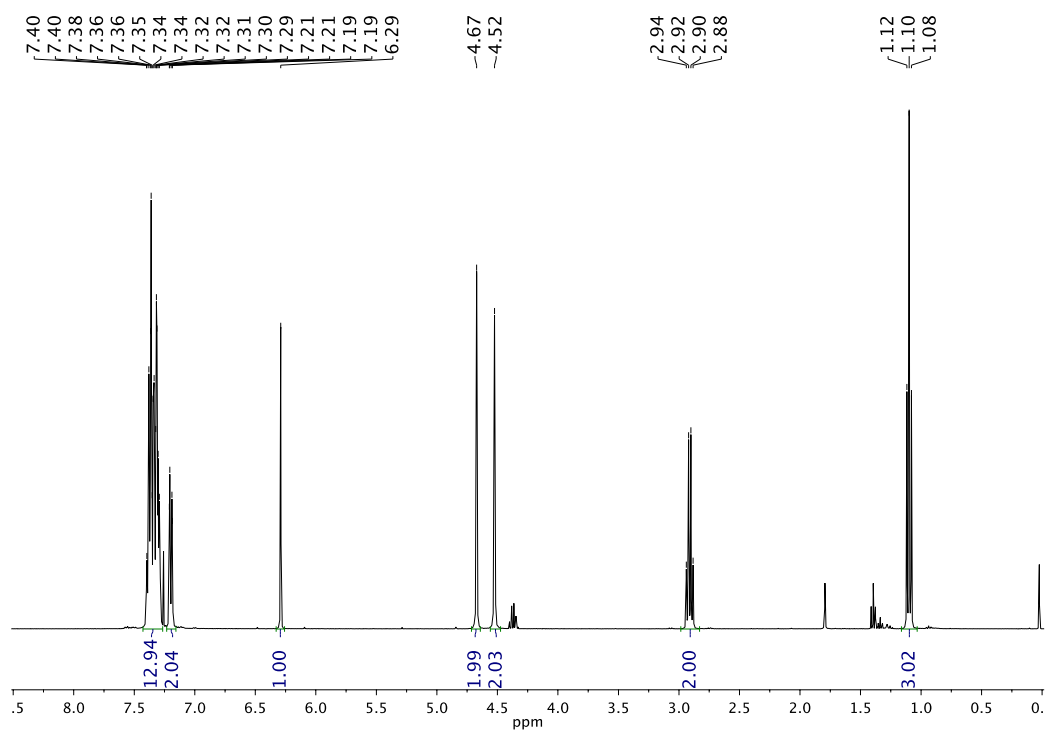

$^{13}\text{C-NMR}$  of **S14** in  $\text{CDCl}_3$

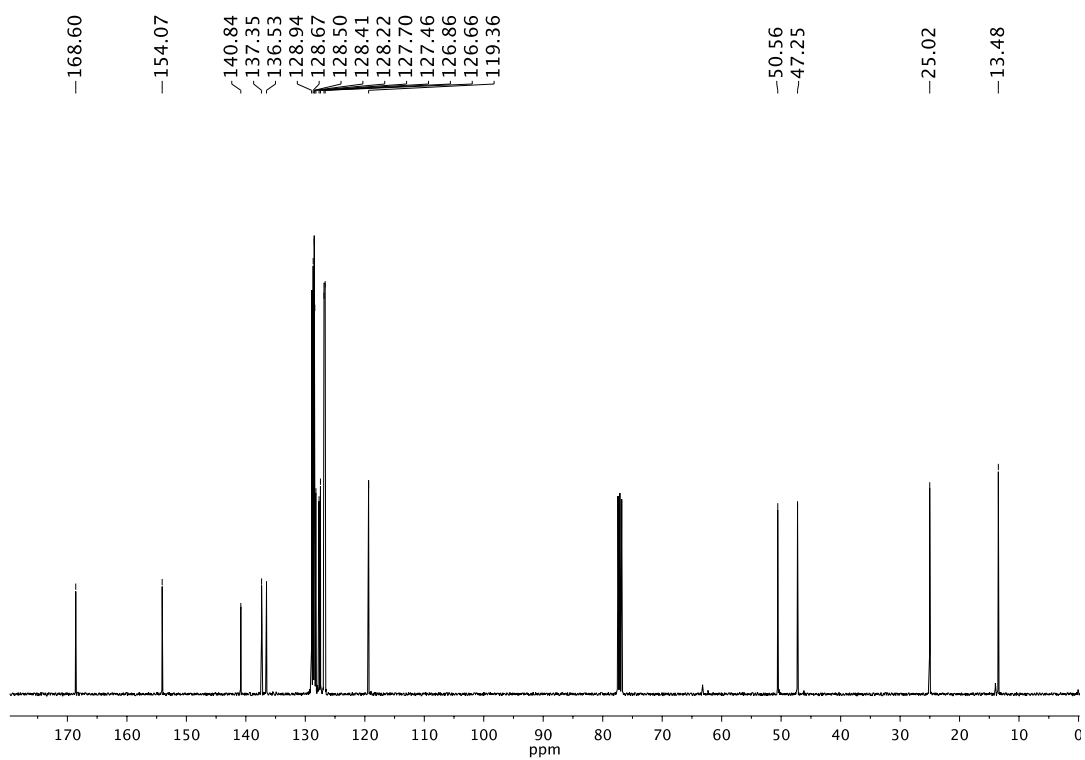

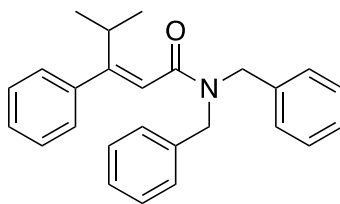

$^1\text{H-NMR}$  of **S15** in  $\text{CDCl}_3$

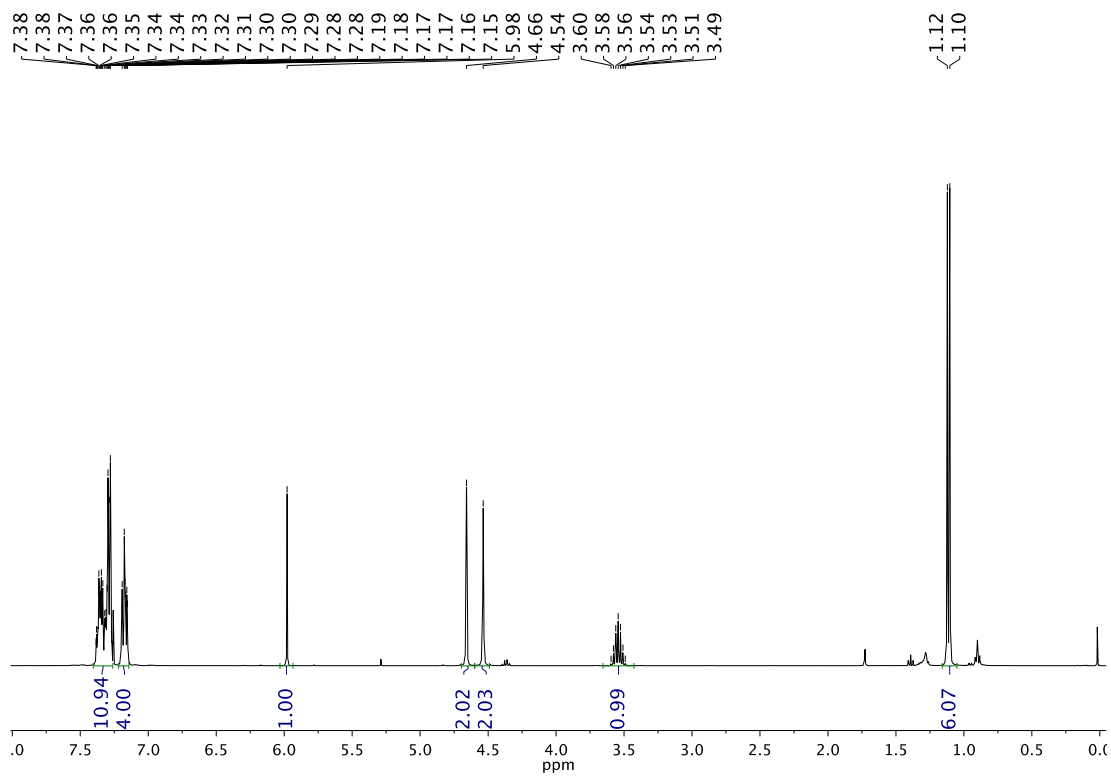

$^{13}\text{C-NMR}$  of **S15** in  $\text{CDCl}_3$

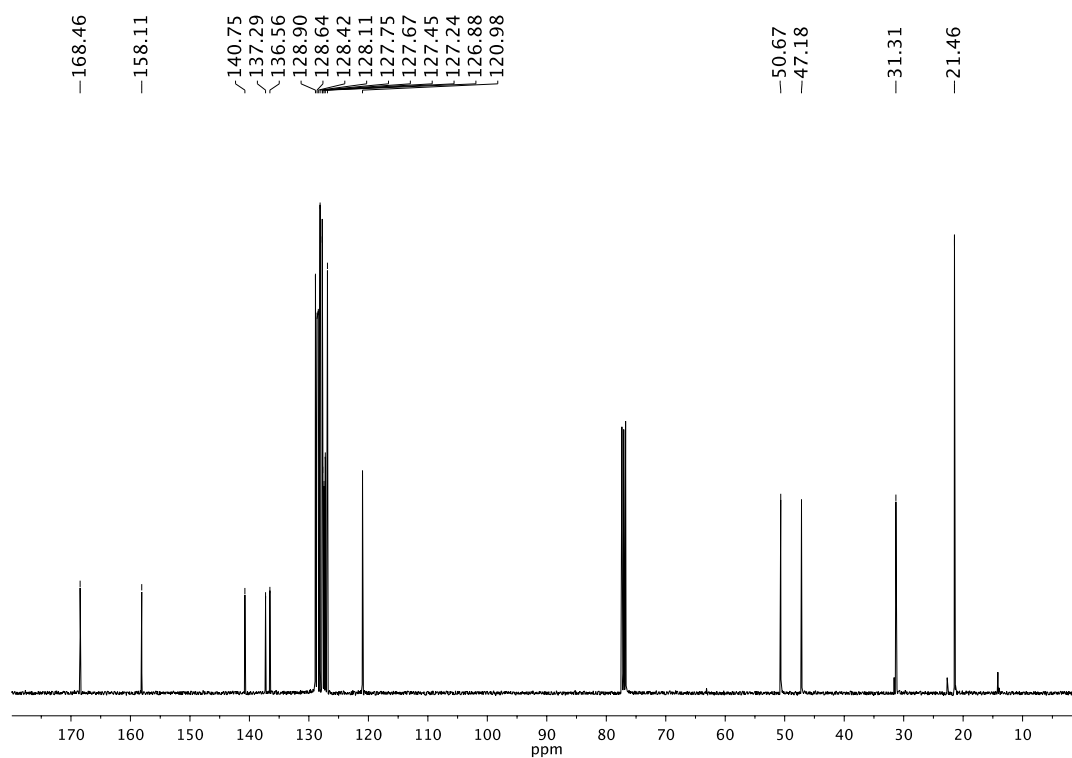

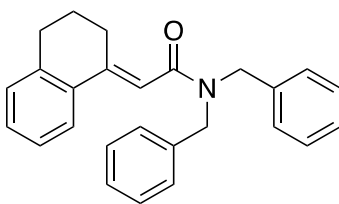

$^1\text{H-NMR}$  of **S16** in  $\text{CDCl}_3$

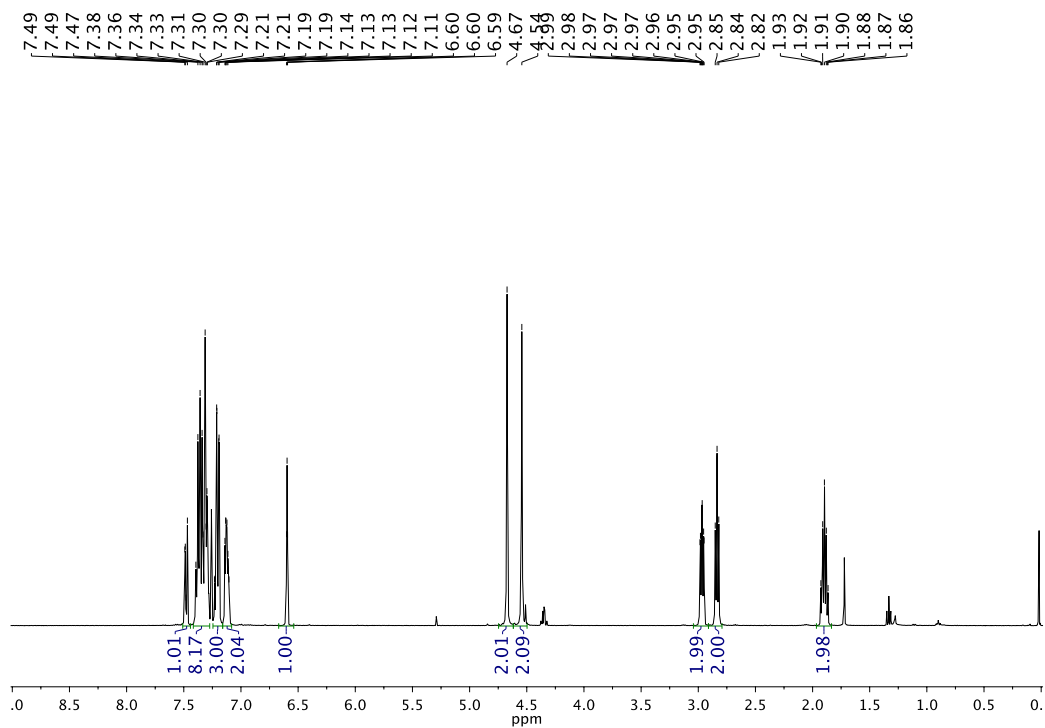

$^{13}\text{C-NMR}$  of **S16** in  $\text{CDCl}_3$

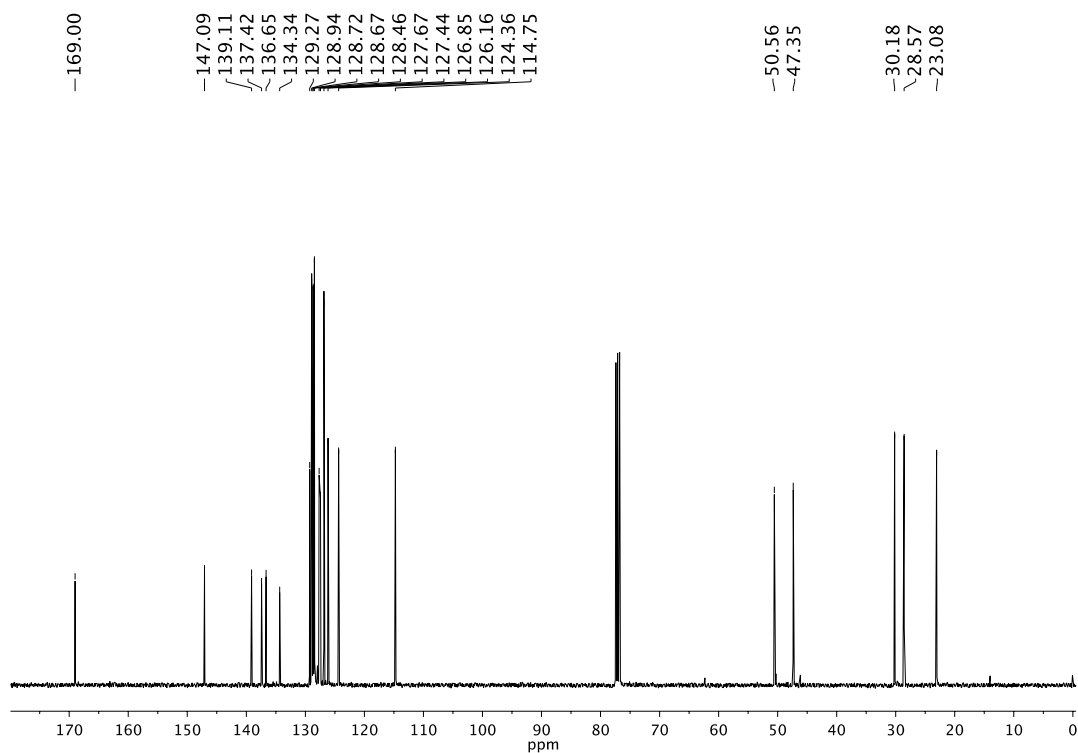

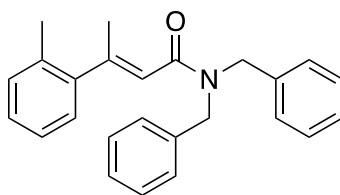

$^1\text{H-NMR}$  of **S17** in  $\text{CDCl}_3$

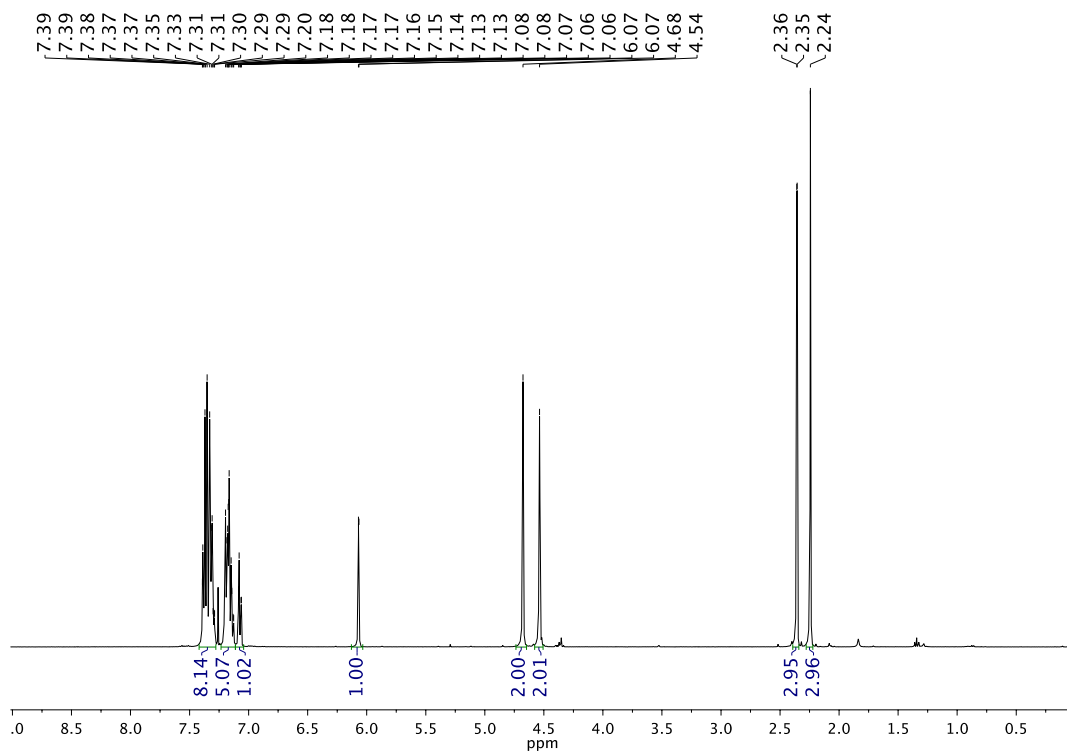

$^{13}\text{C-NMR}$  of **S17** in  $\text{CDCl}_3$

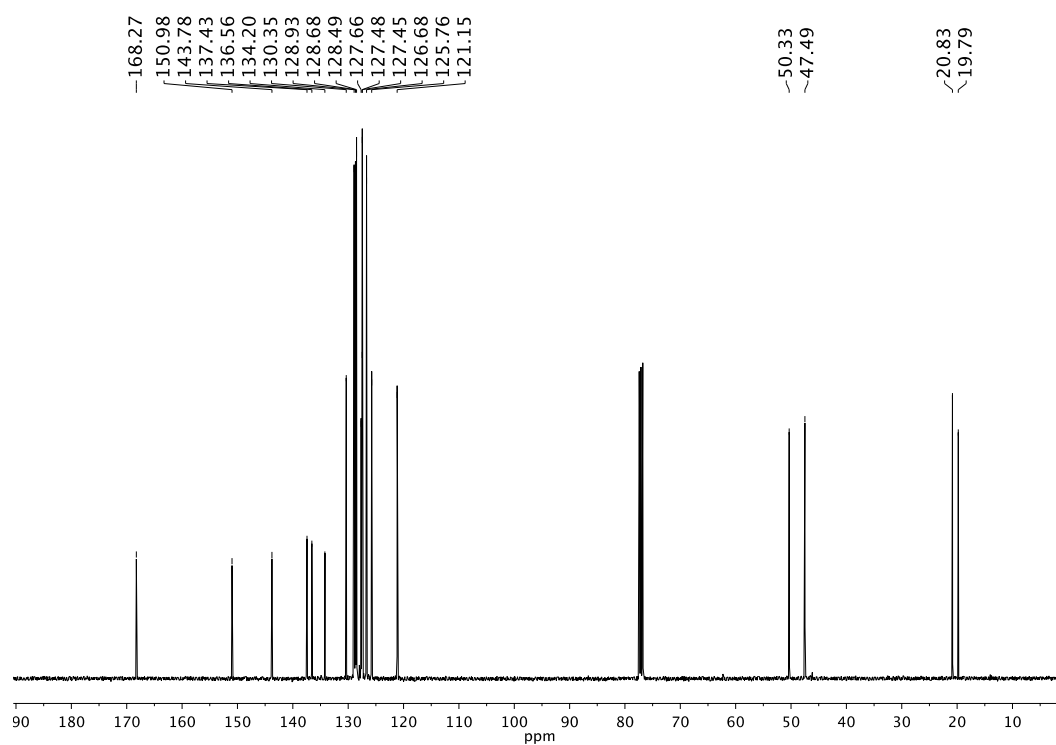

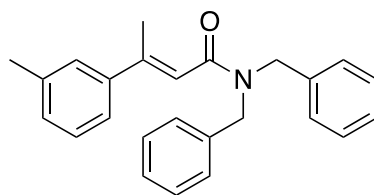

$^1\text{H-NMR}$  of **S18** in  $\text{CDCl}_3$

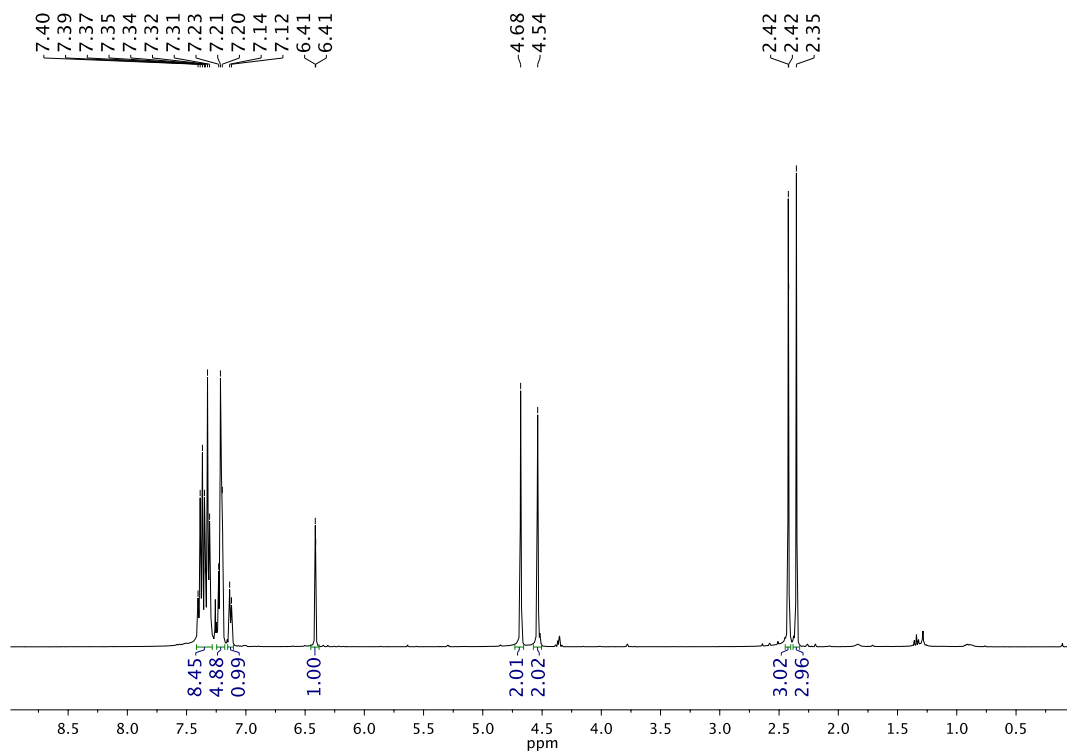

$^{13}\text{C-NMR}$  of **S18** in  $\text{CDCl}_3$

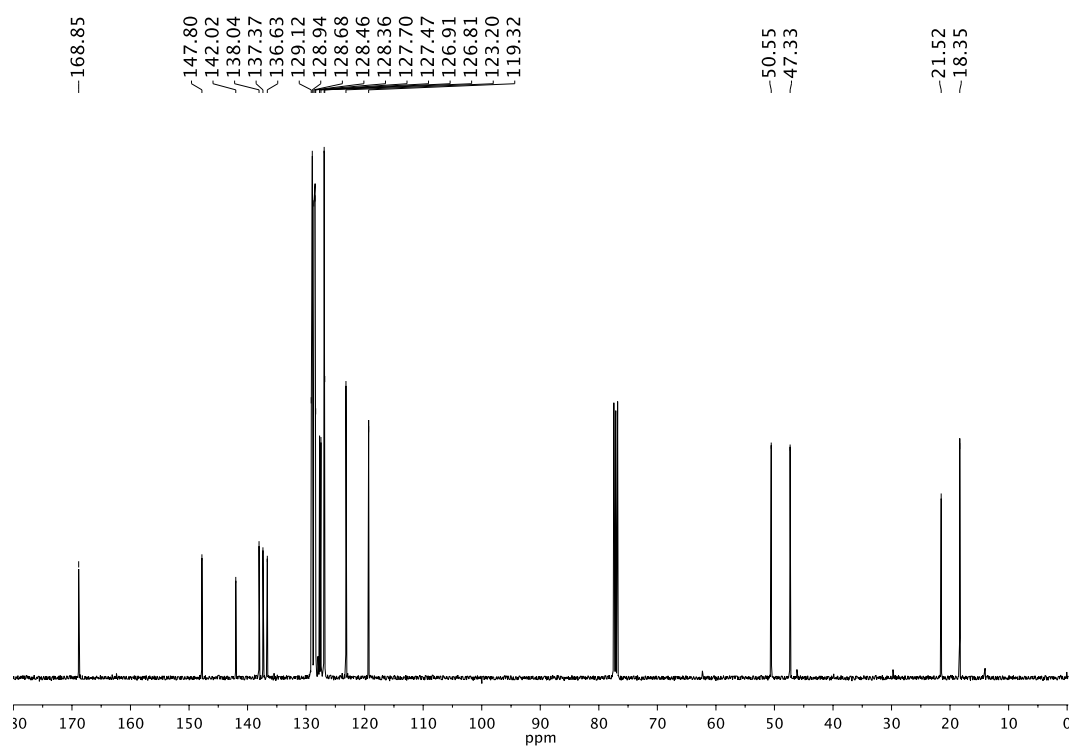

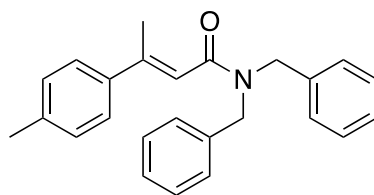

$^1\text{H-NMR}$  of **S19** in  $\text{CDCl}_3$

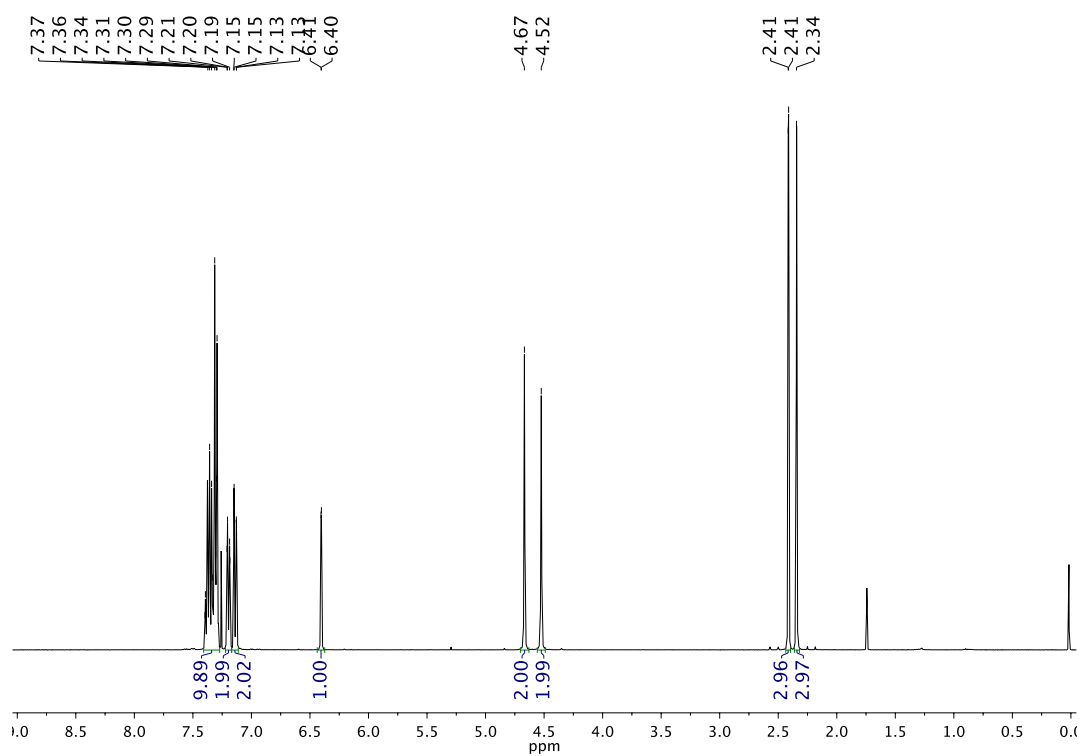

$^{13}\text{C-NMR}$  of **S19** in  $\text{CDCl}_3$

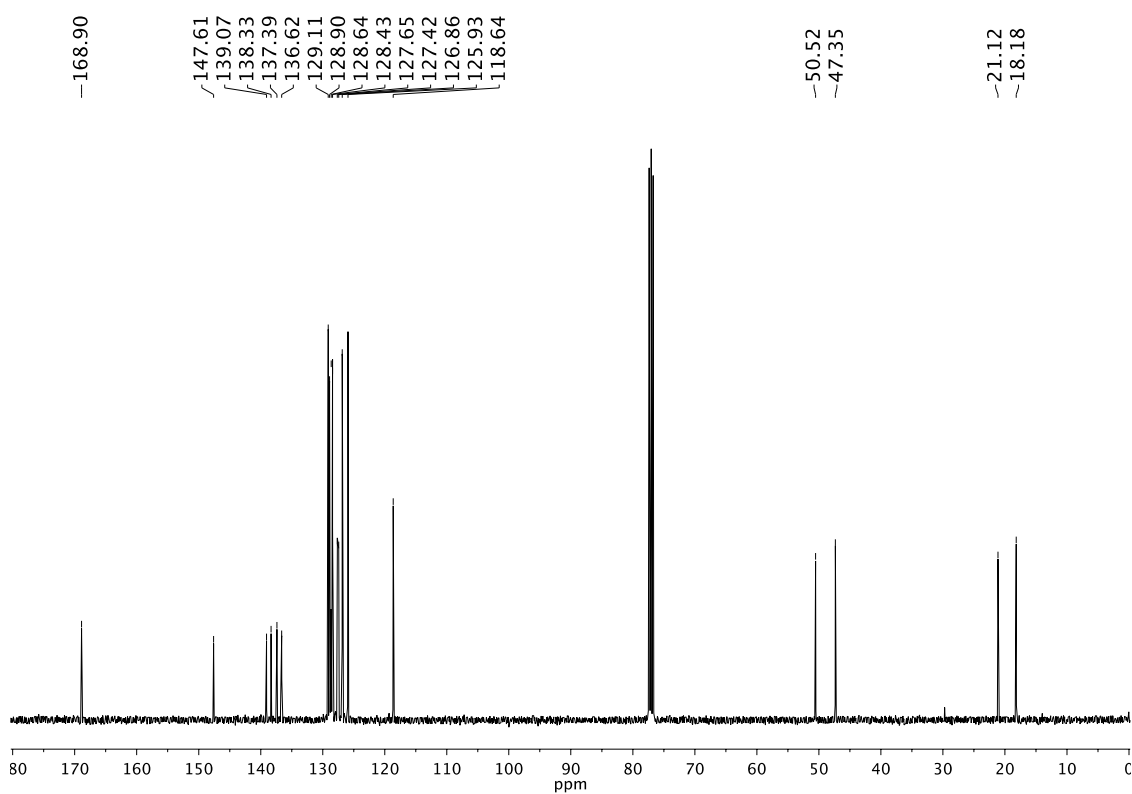

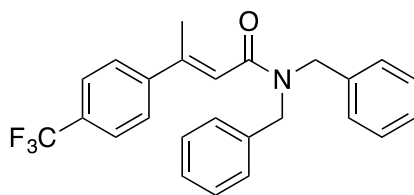

$^1\text{H-NMR}$  of **S20** in  $\text{CDCl}_3$

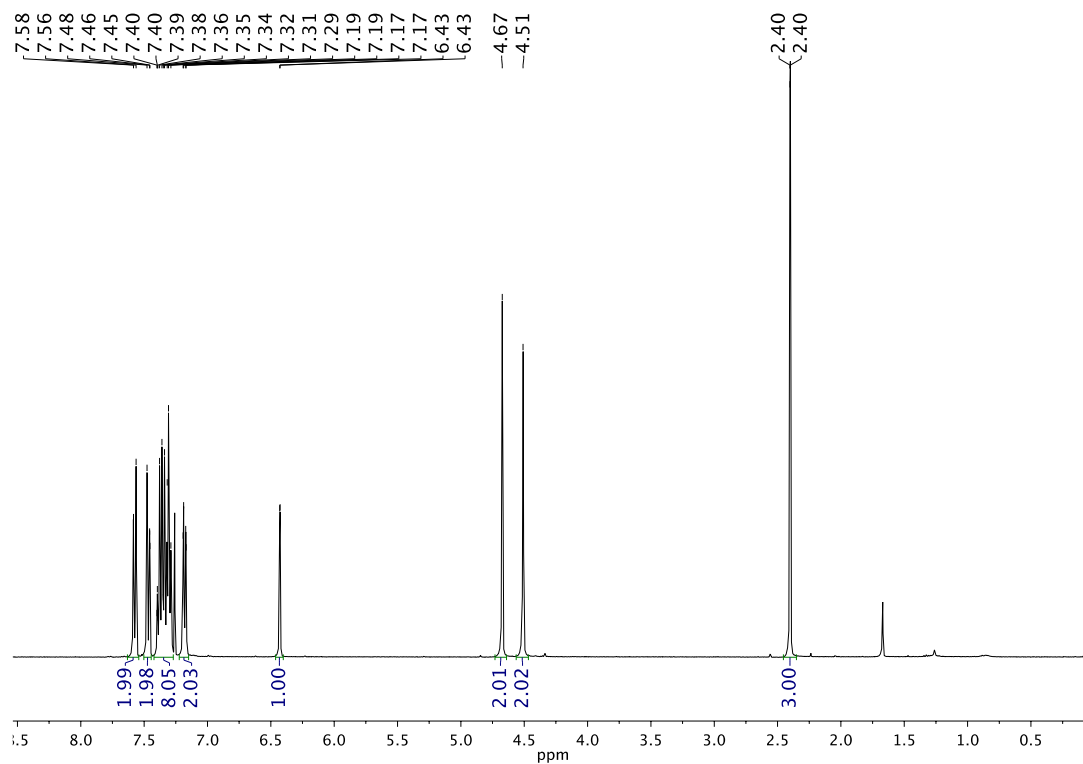

$^{13}\text{C-NMR}$  of **S20** in  $\text{CDCl}_3$

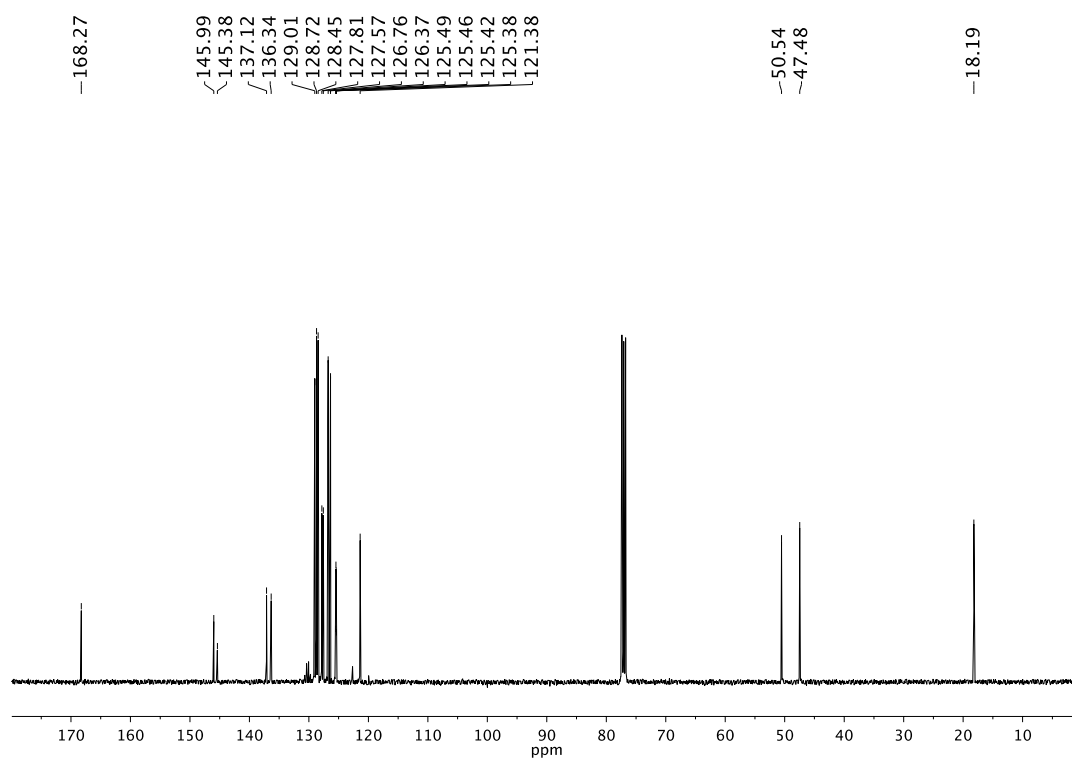

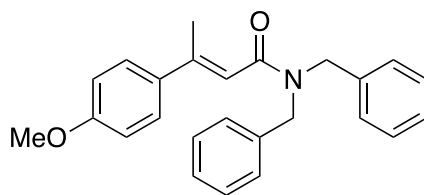

$^1\text{H-NMR}$  of **S21** in  $\text{CDCl}_3$

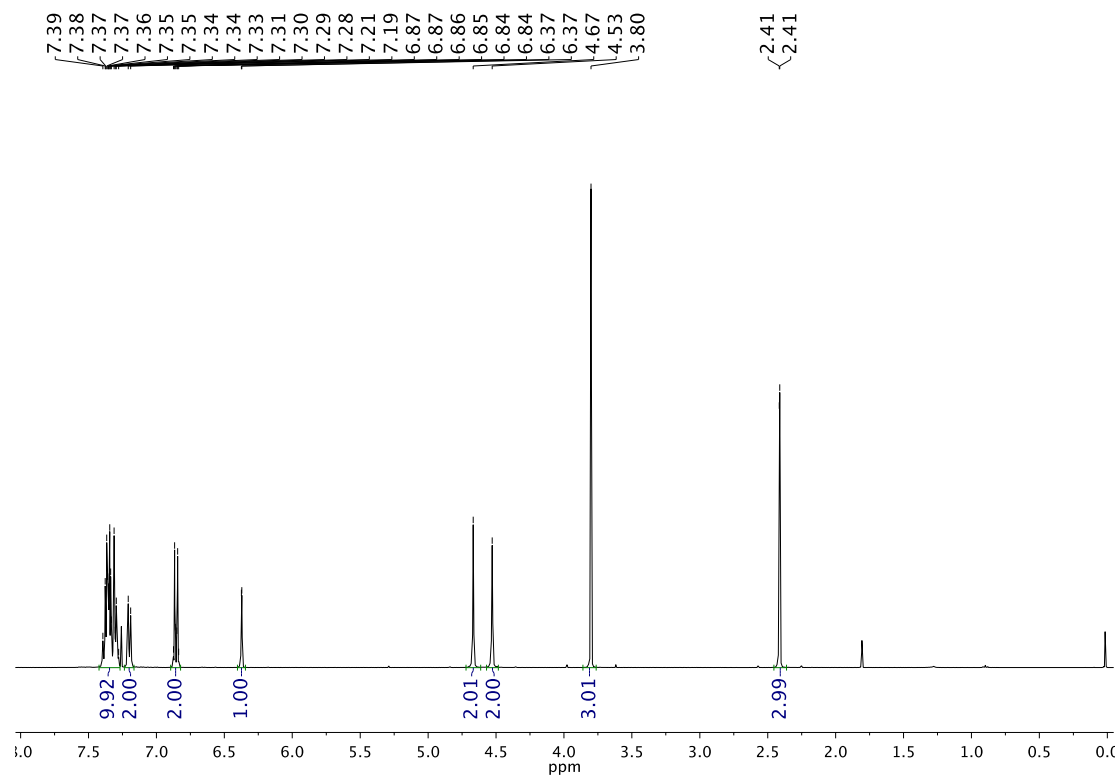

$^{13}\text{C-NMR}$  of **S21** in  $\text{CDCl}_3$

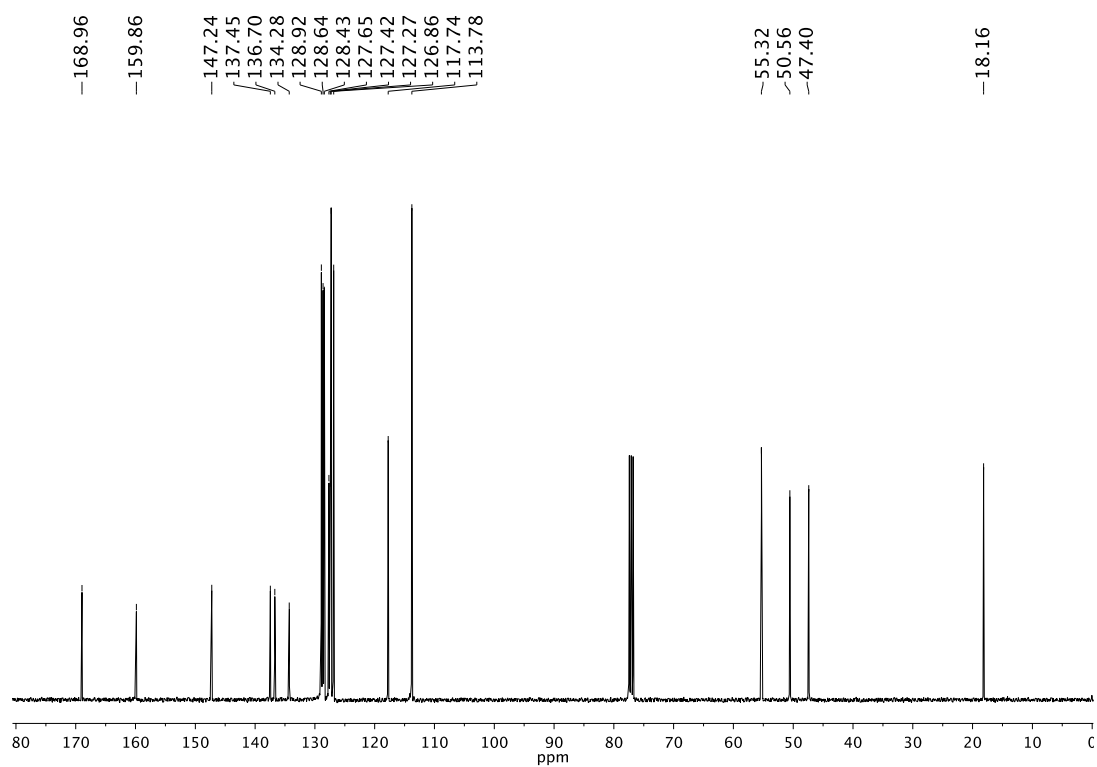

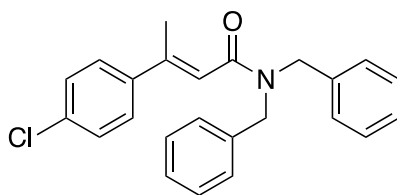

$^1\text{H-NMR}$  of **S22** in  $\text{CDCl}_3$

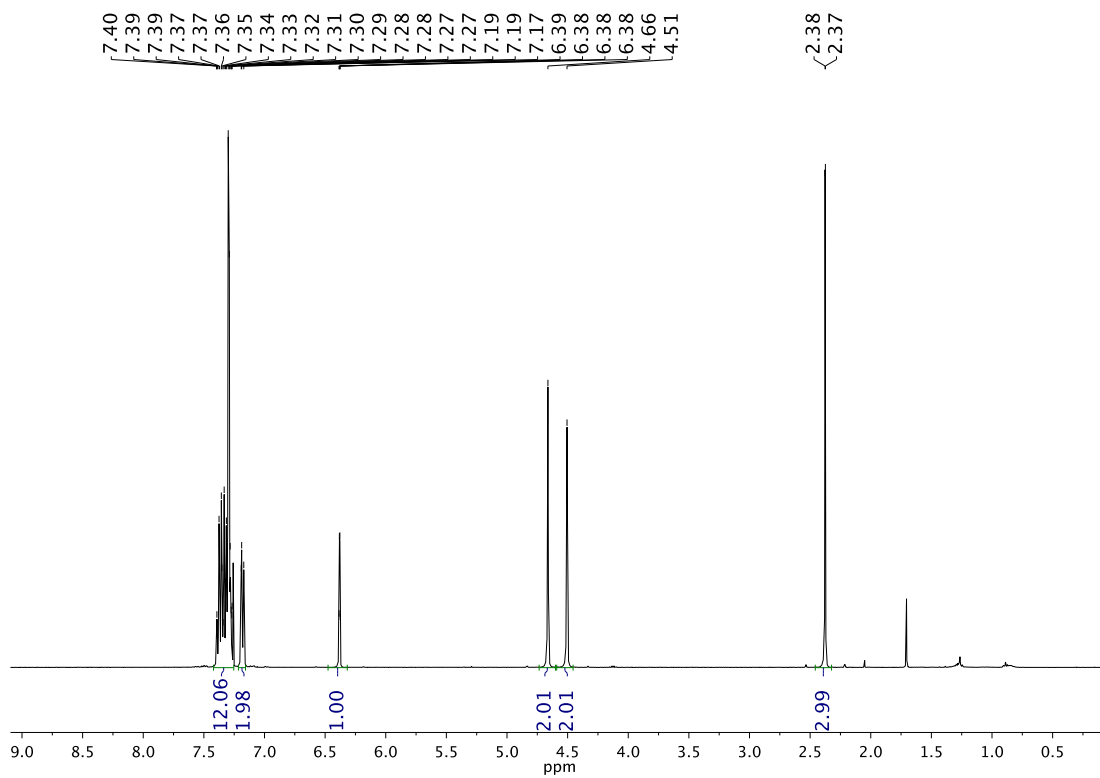

$^{13}\text{C-NMR}$  of **S22** in  $\text{CDCl}_3$

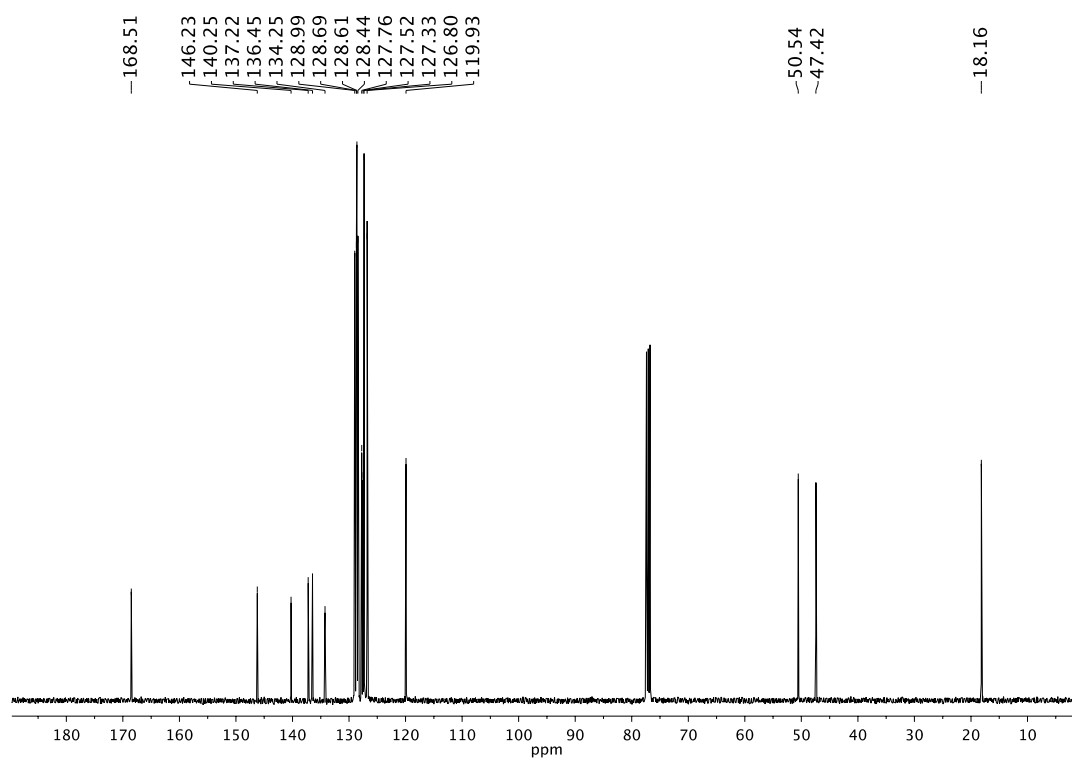

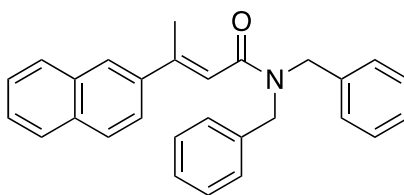

$^1\text{H-NMR}$  of **S23** in  $\text{CDCl}_3$

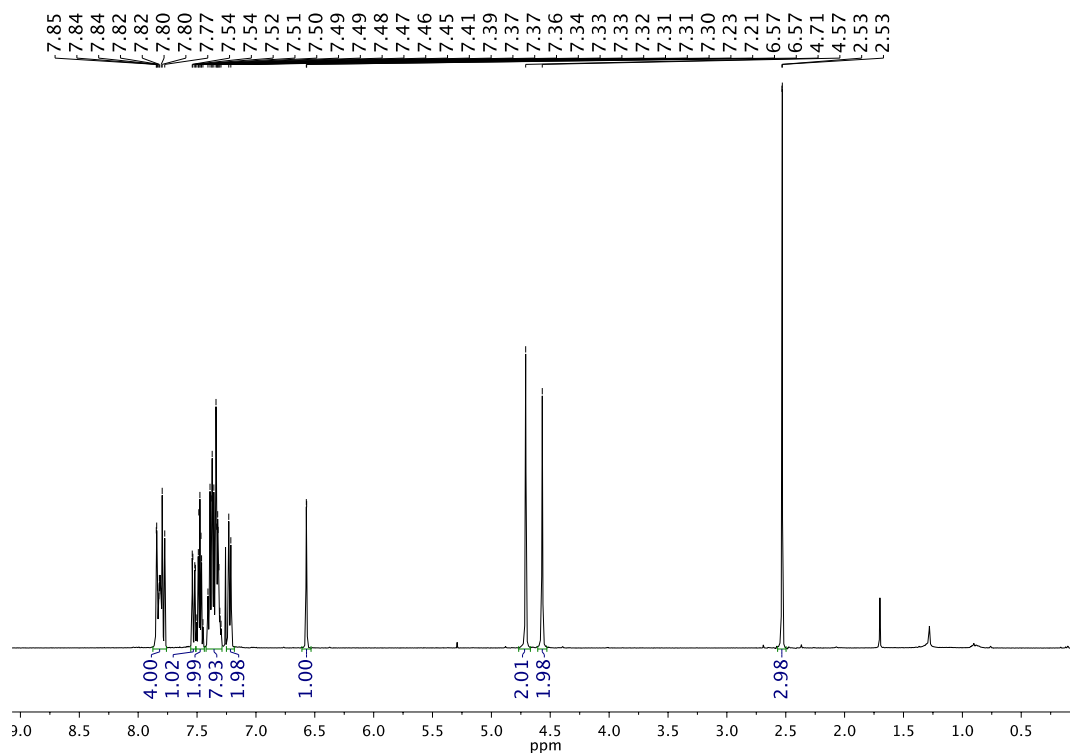

$^{13}\text{C-NMR}$  of **S23** in  $\text{CDCl}_3$

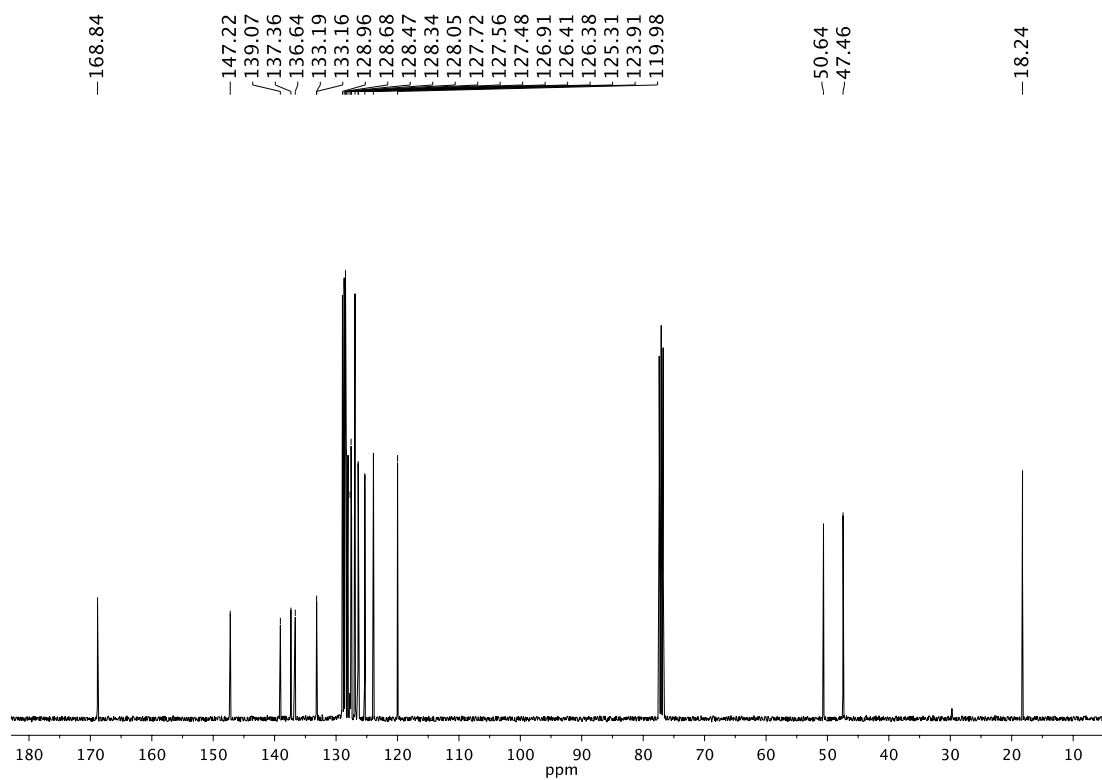

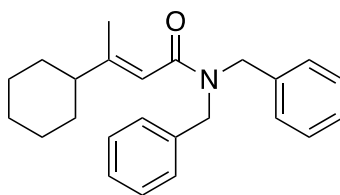

$^1\text{H-NMR}$  of **S24** in  $\text{CDCl}_3$

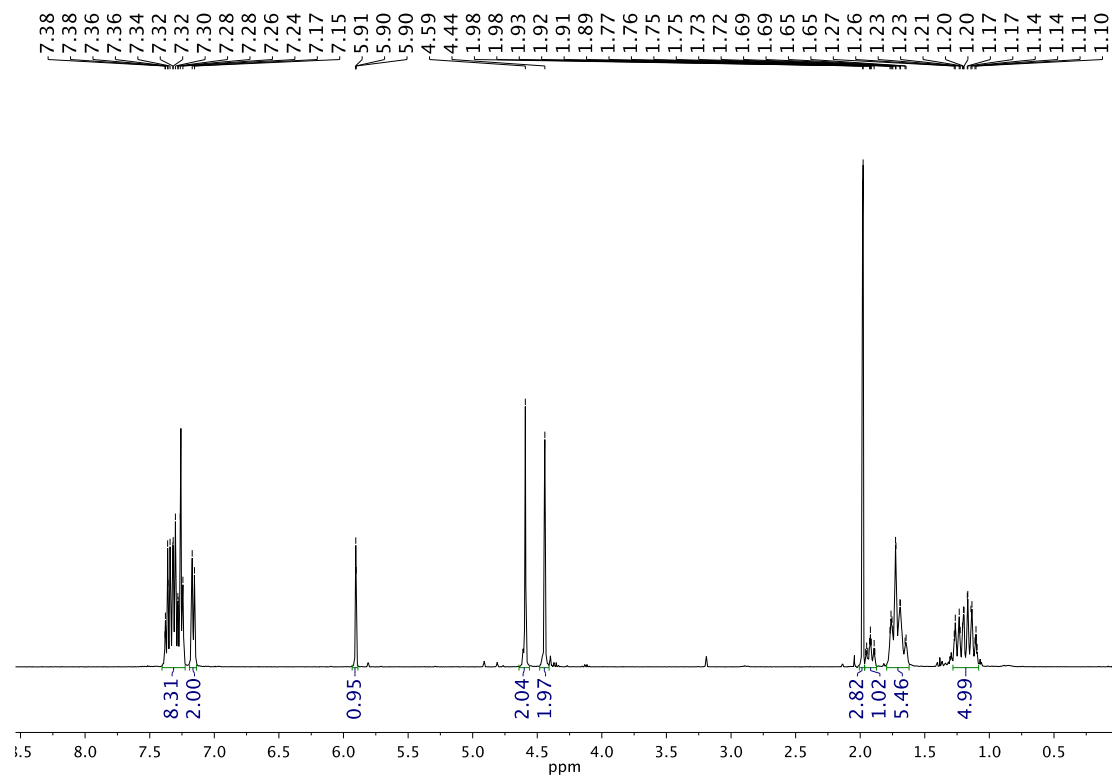

$^{13}\text{C-NMR}$  of **S24** in  $\text{CDCl}_3$

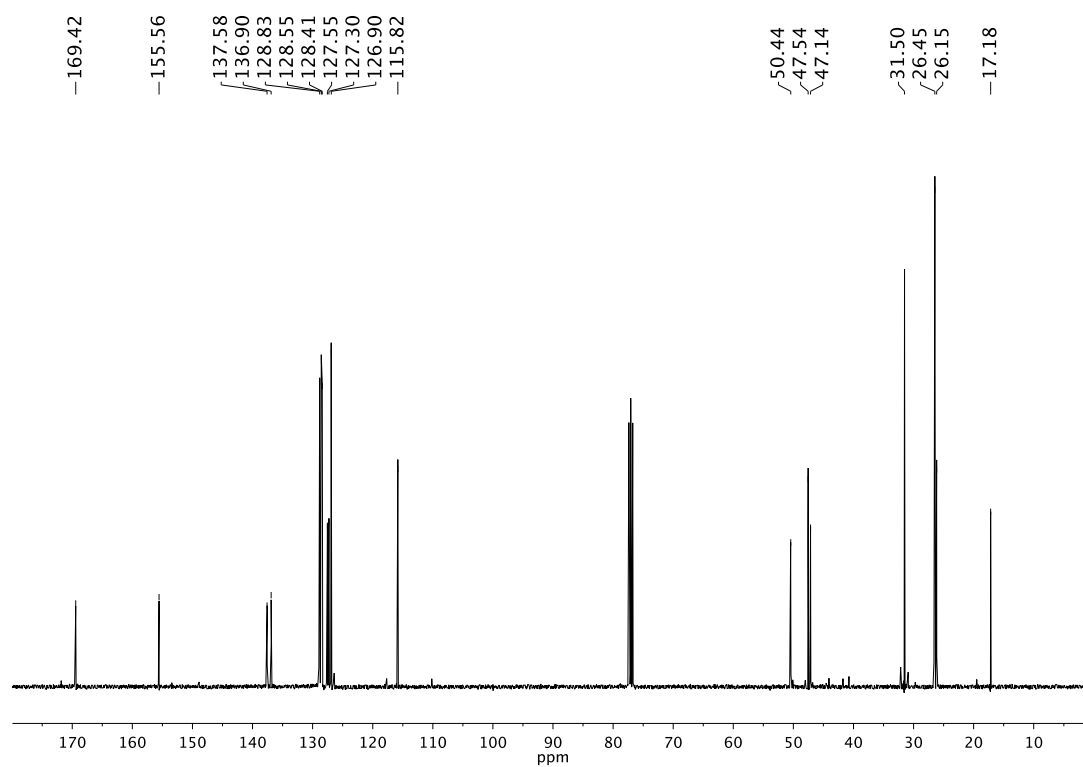

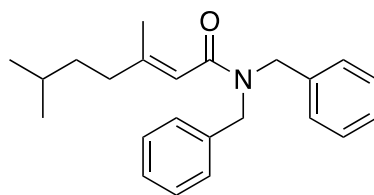

<sup>1</sup>H-NMR of **S25** in CDCl<sub>3</sub>

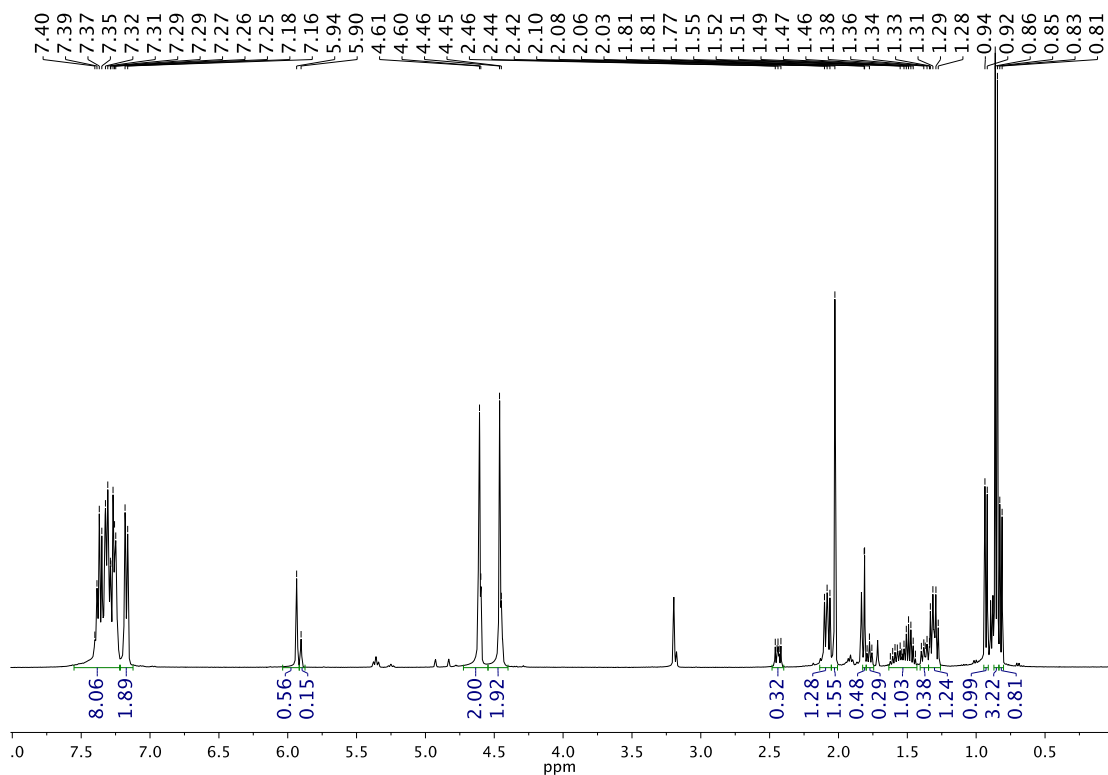

<sup>13</sup>C-NMR of **S25** in CDCl<sub>3</sub>

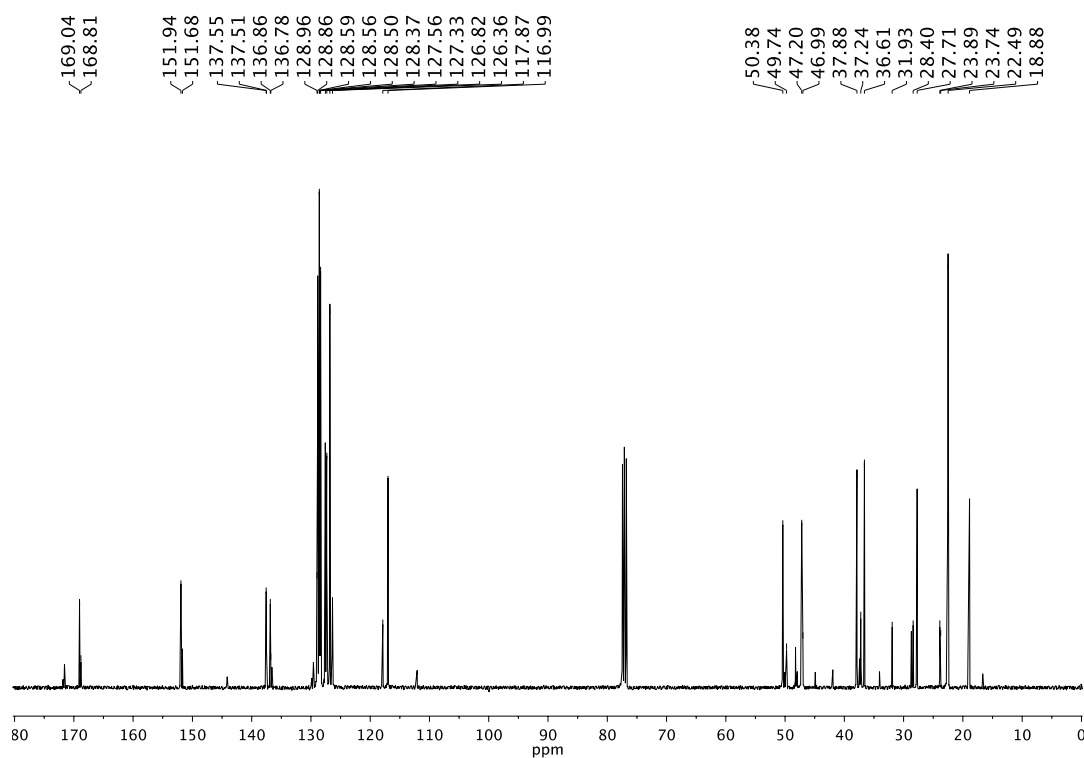

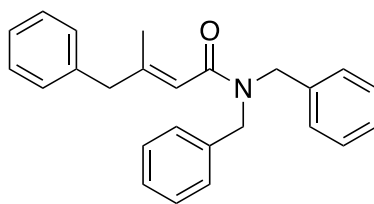

$^1\text{H-NMR}$  of **S26** in  $\text{CDCl}_3$

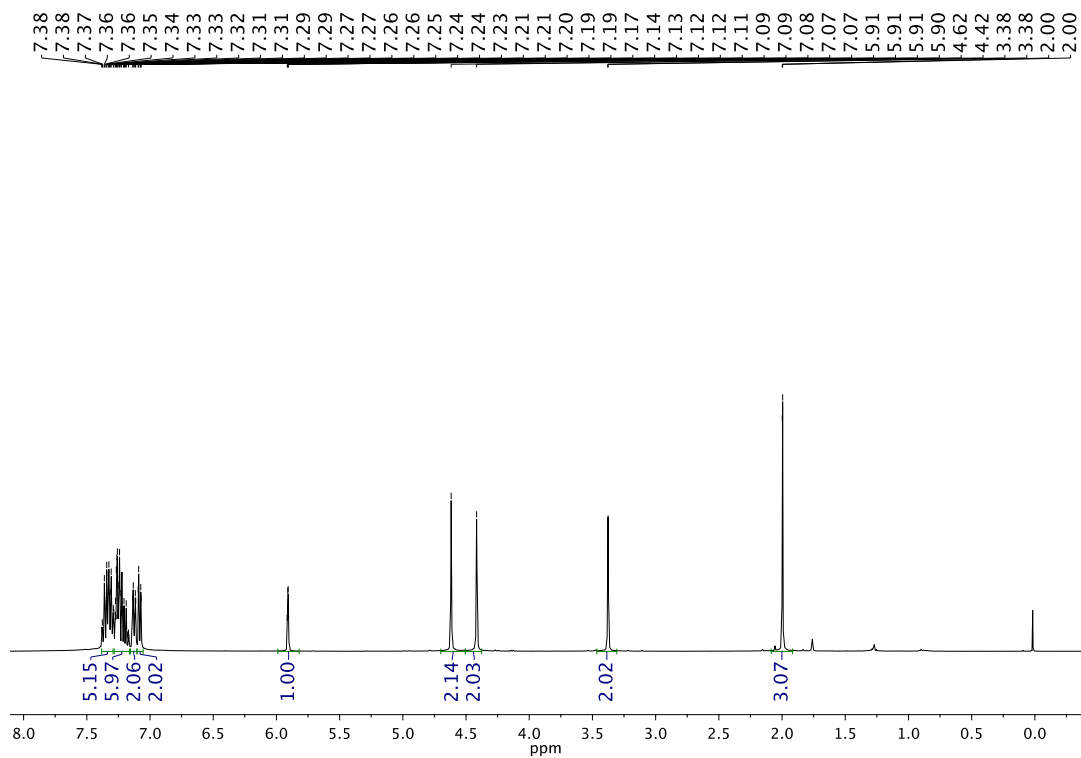

$^{13}\text{C-NMR}$  of **S26** in  $\text{CDCl}_3$

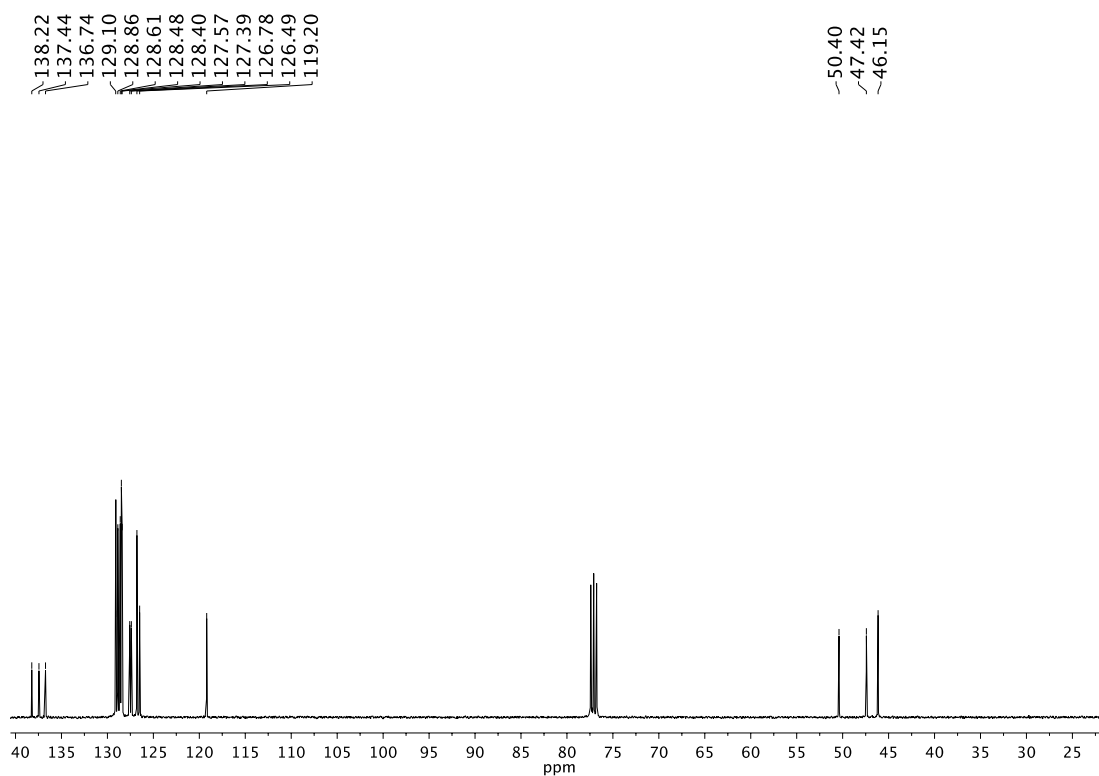

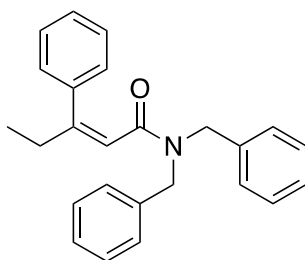

$^1\text{H-NMR}$  of **S27** in  $\text{CDCl}_3$

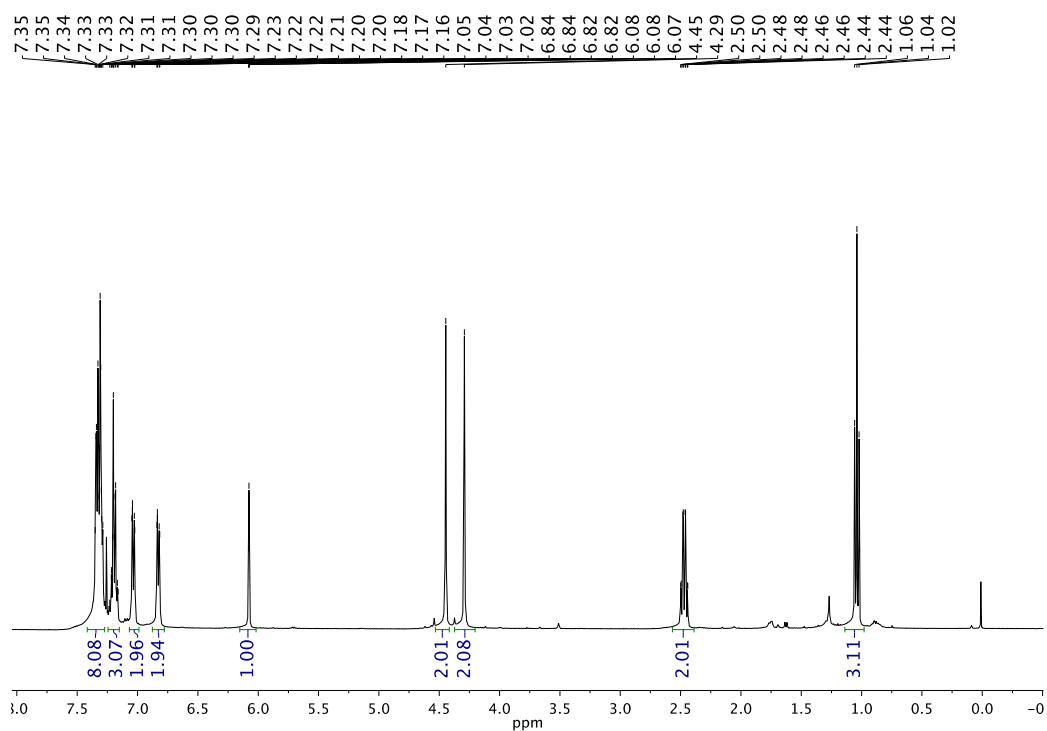

$^{13}\text{C-NMR}$  of **S27** in  $\text{CDCl}_3$

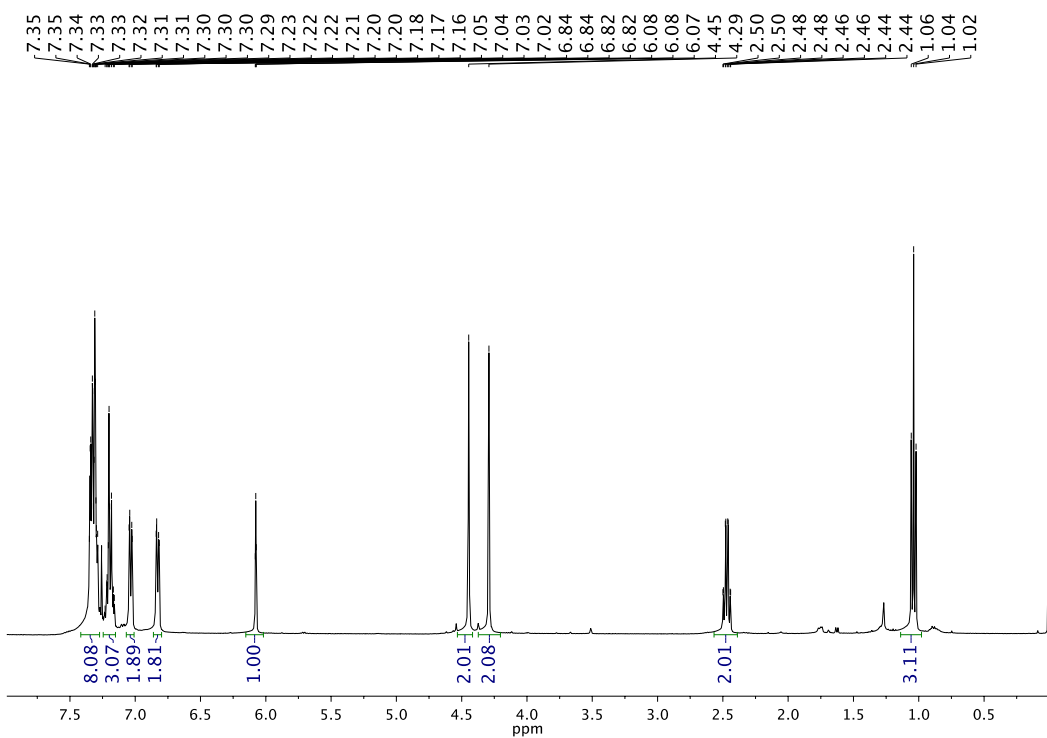

## 6.2) $^1\text{H}$ and $^{13}\text{C}$ -NMR spectra of isolated products

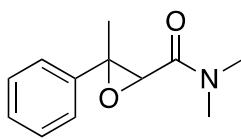

$^1\text{H}$ -NMR of **E3** in  $\text{CDCl}_3$

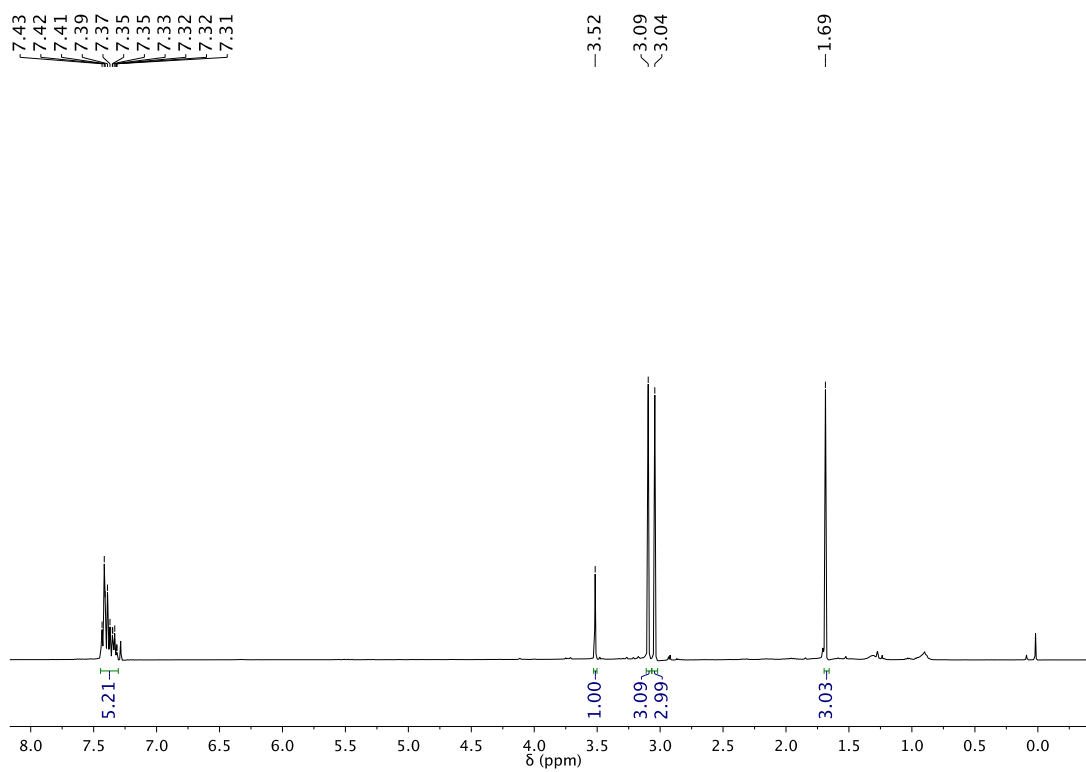

$^{13}\text{C}$ -NMR of **E3** in  $\text{CDCl}_3$

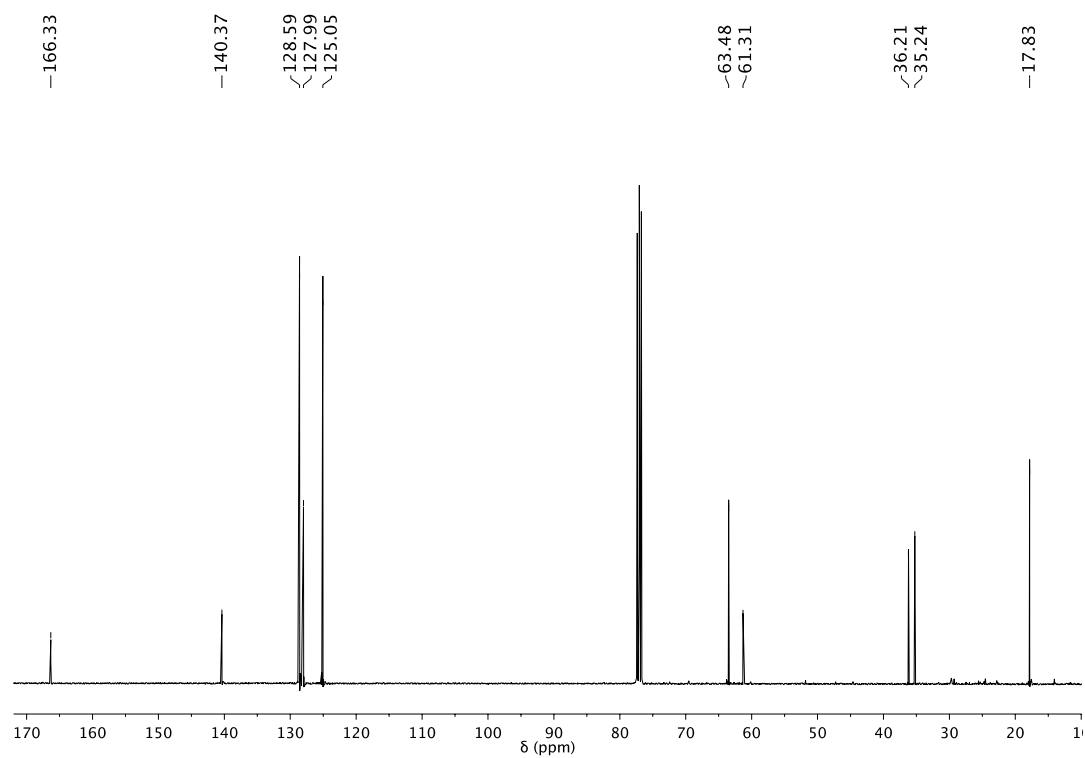

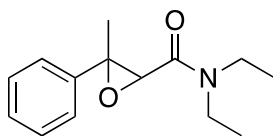

$^1\text{H-NMR}$  of **E4** in  $\text{CDCl}_3$

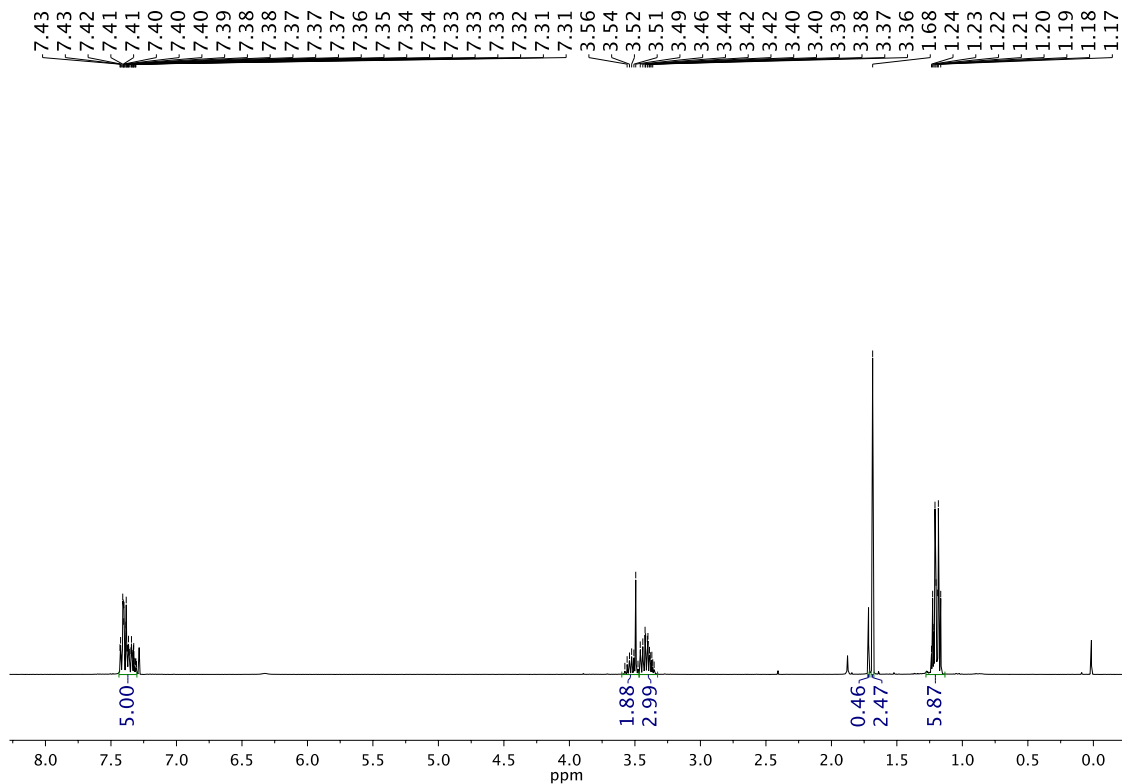

$^{13}\text{C-NMR}$  of **E4** in  $\text{CDCl}_3$

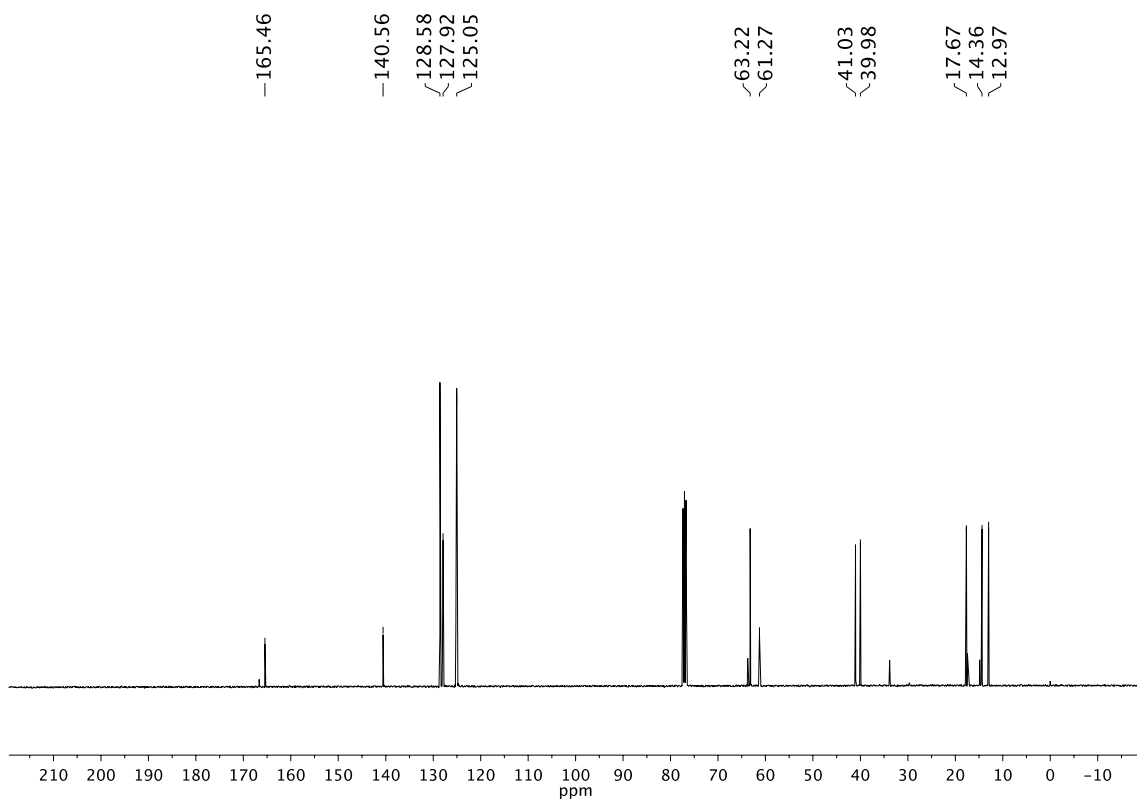

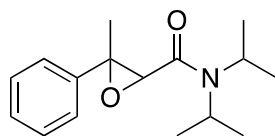

$^1\text{H-NMR}$  of **E5** in  $\text{CDCl}_3$

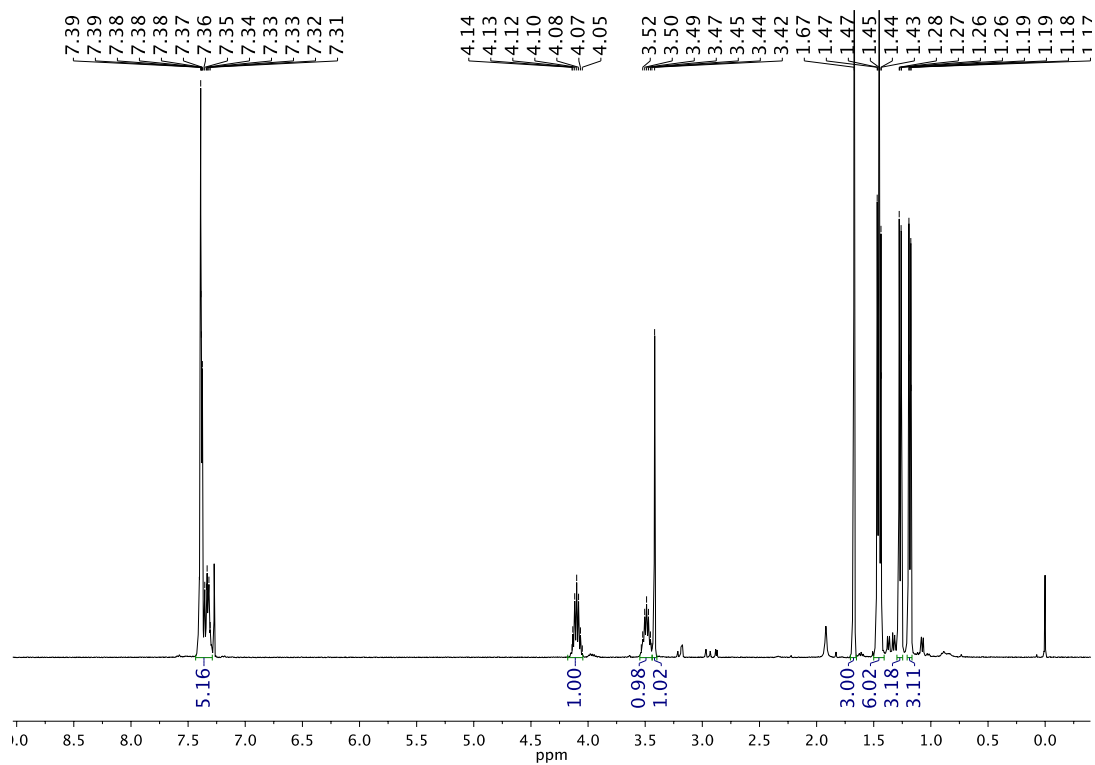

$^{13}\text{C-NMR}$  of **E5** in  $\text{CDCl}_3$

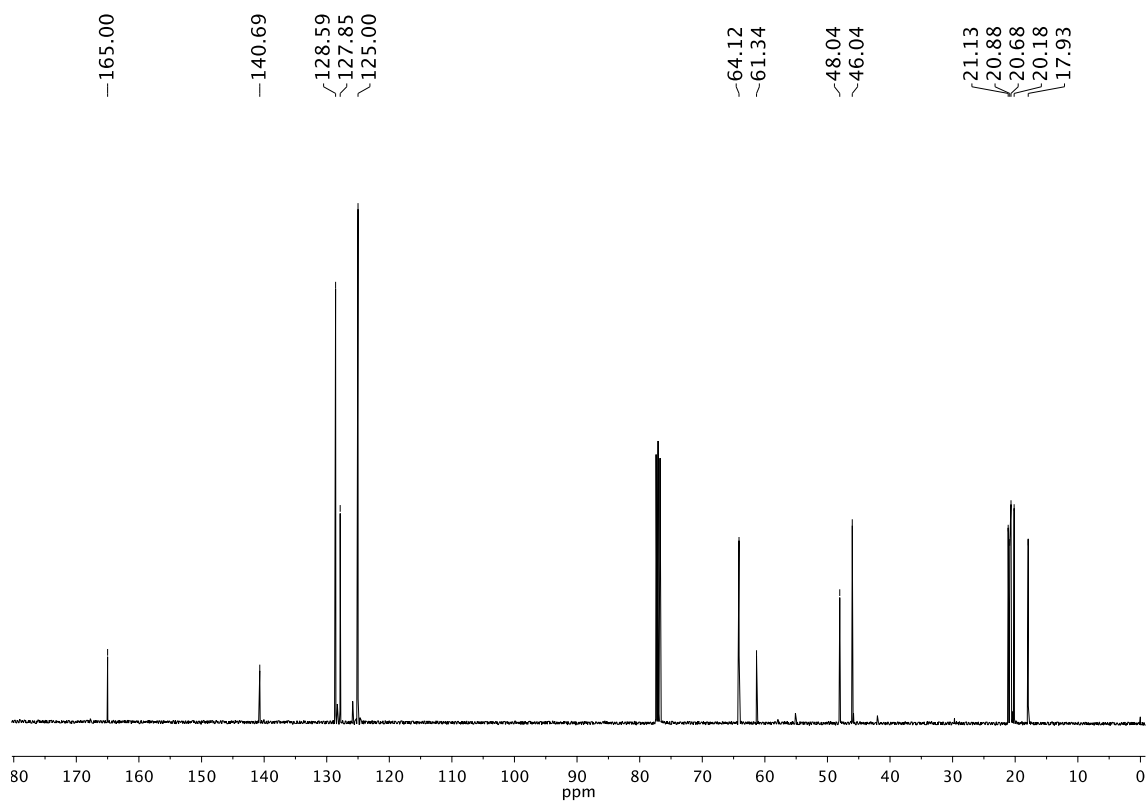

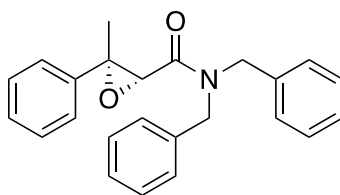

$^1\text{H-NMR}$  of **E6** in  $\text{CDCl}_3$

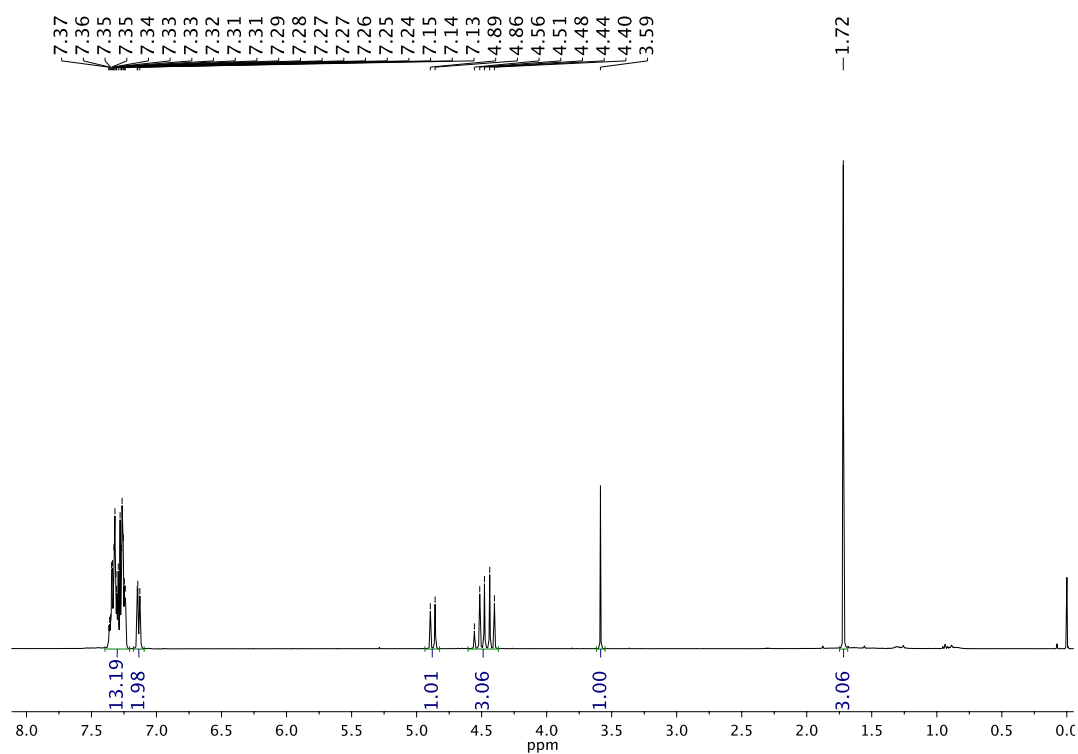

$^{13}\text{C-NMR}$  of **E6** in  $\text{CDCl}_3$

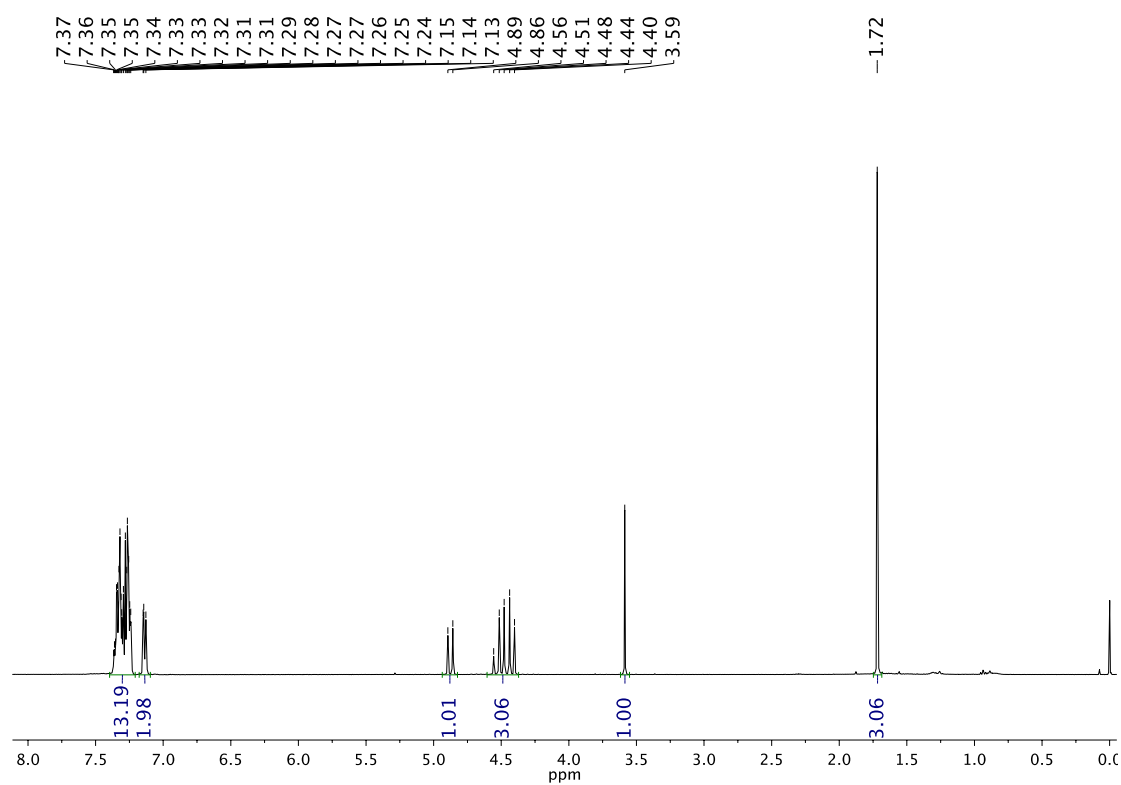

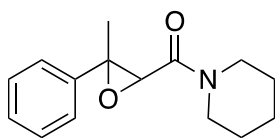

$^1\text{H-NMR}$  of **E7** in  $\text{CDCl}_3$

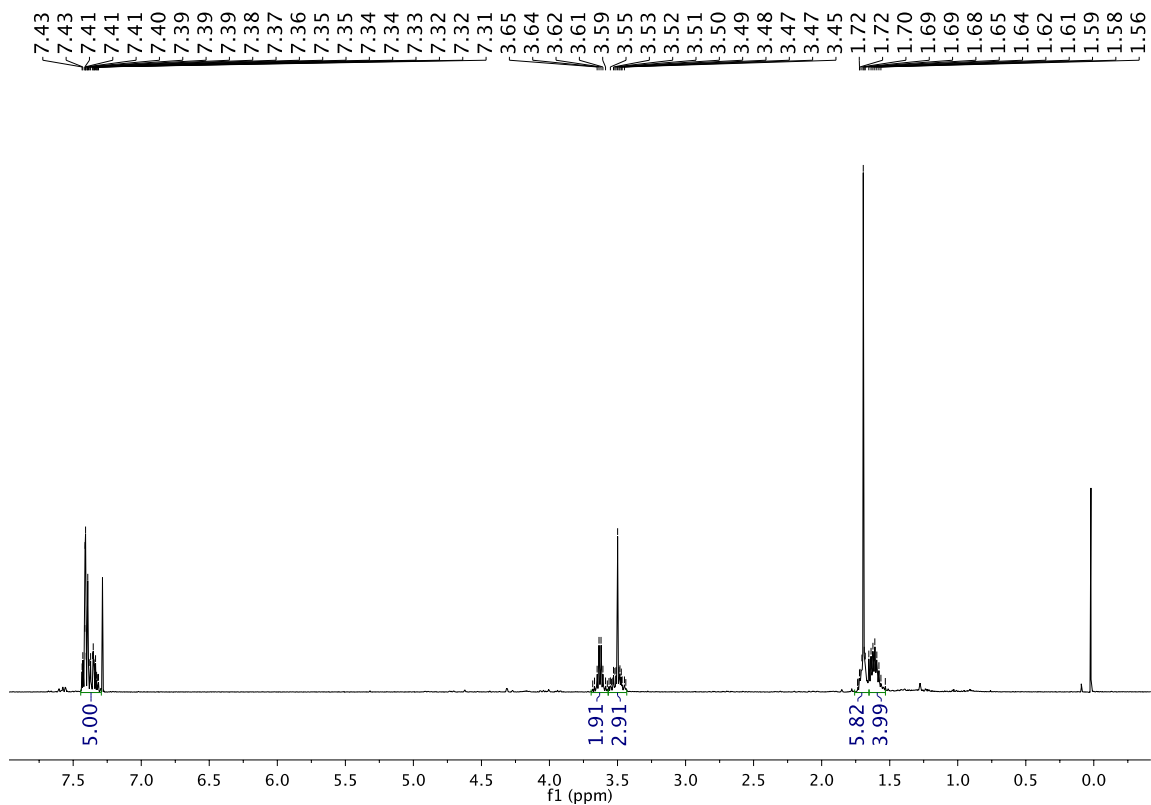

$^{13}\text{C-NMR}$  of **E7** in  $\text{CDCl}_3$

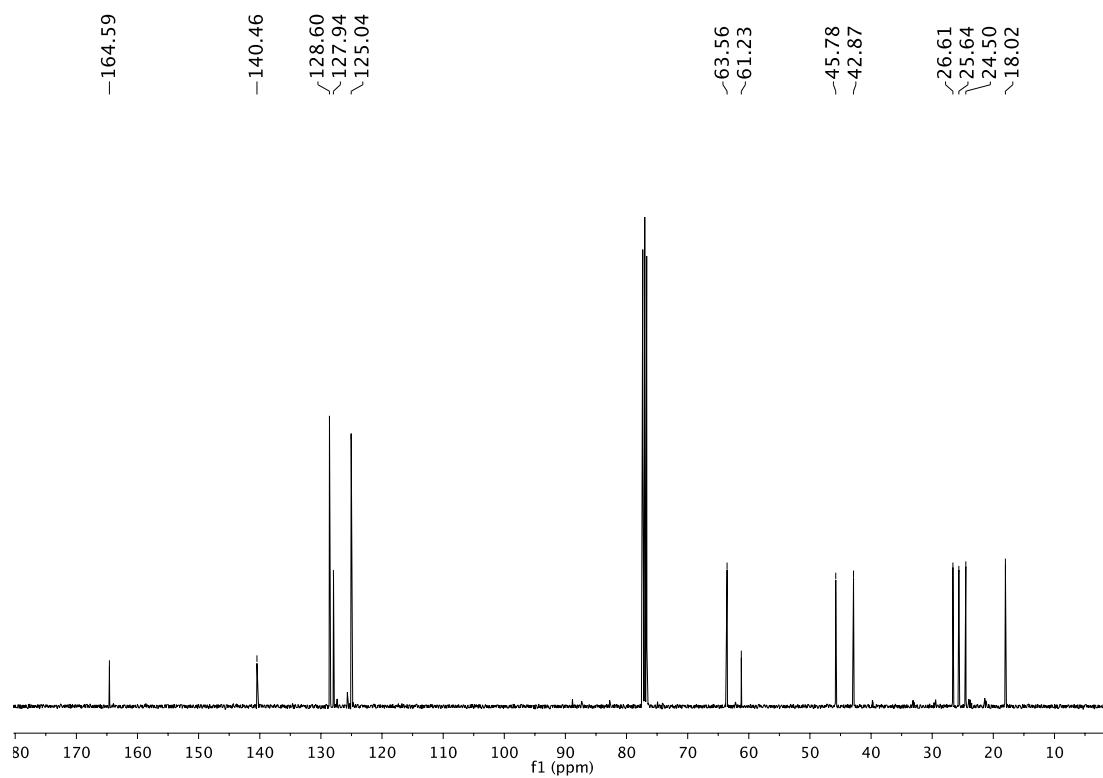

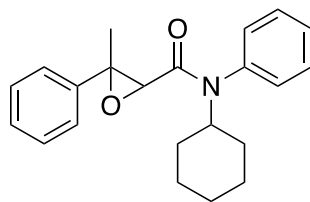

$^1\text{H-NMR}$  of **E9** in  $\text{CDCl}_3$

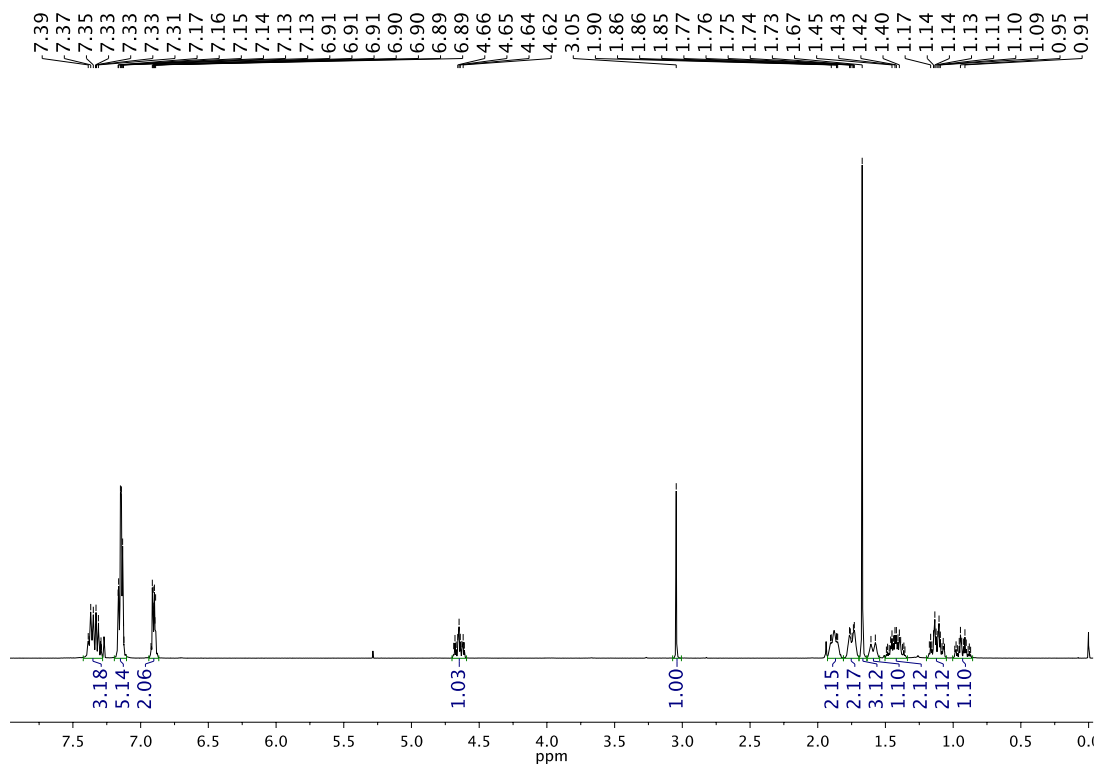

$^{13}\text{C-NMR}$  of **E9** in  $\text{CDCl}_3$

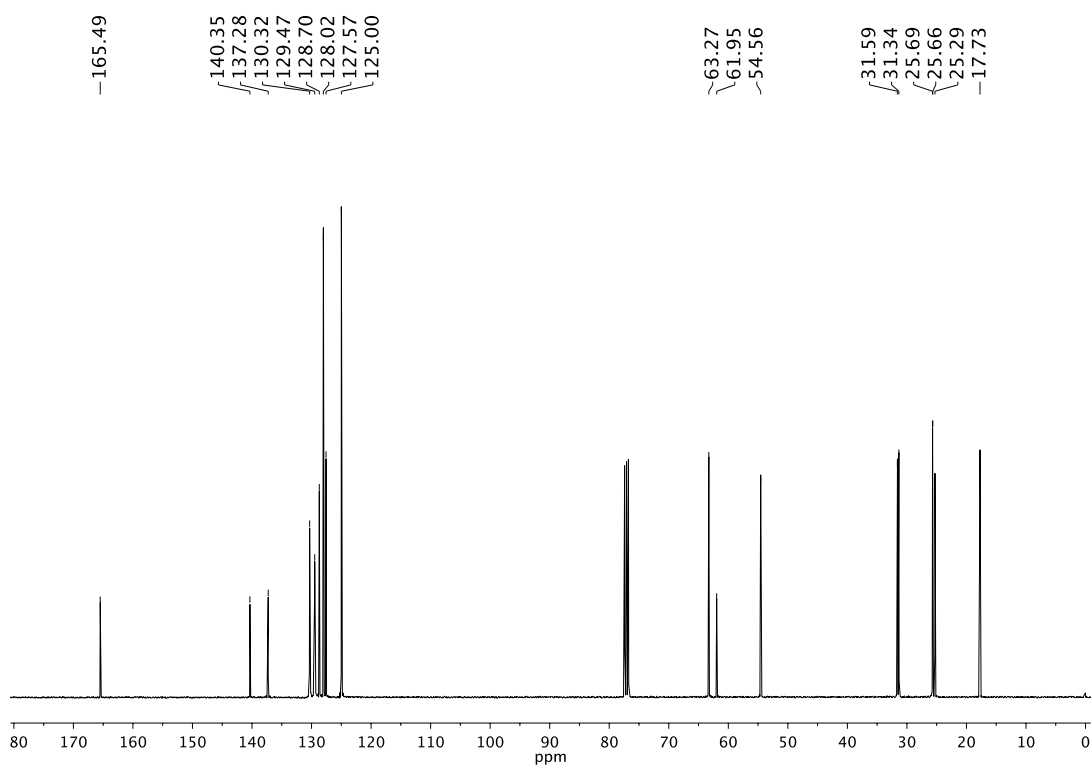

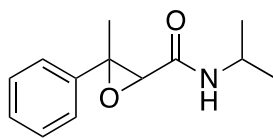

$^1\text{H-NMR}$  of **E10** in  $\text{CDCl}_3$

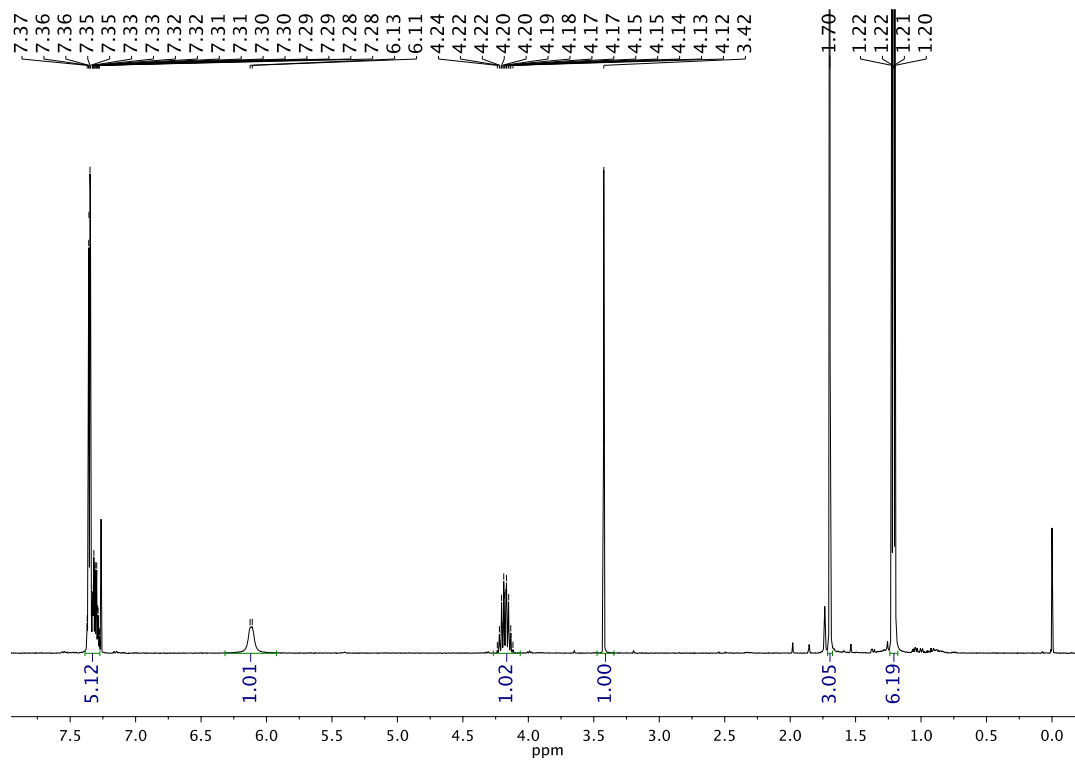

$^{13}\text{C-NMR}$  of **E10** in  $\text{CDCl}_3$

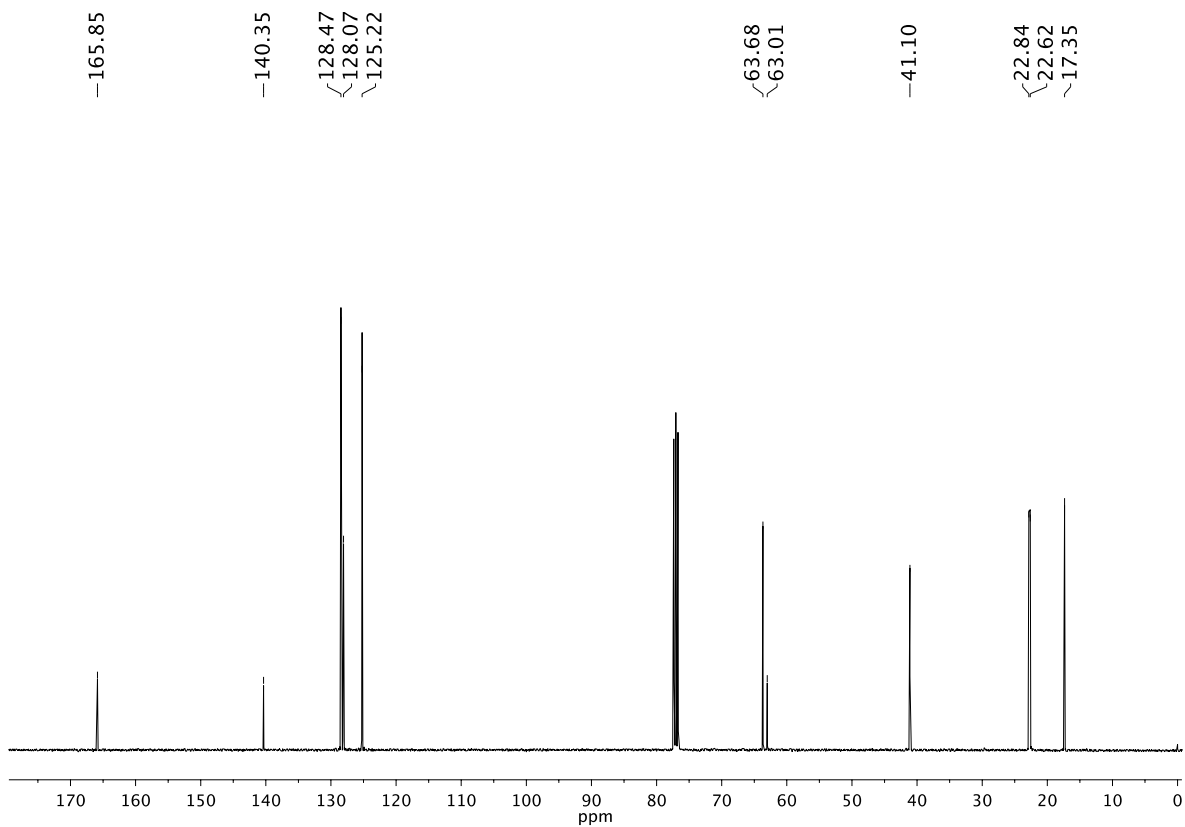

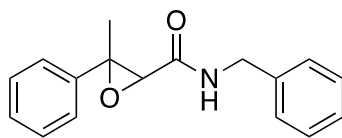

$^1\text{H-NMR}$  of **E11** in  $\text{CDCl}_3$

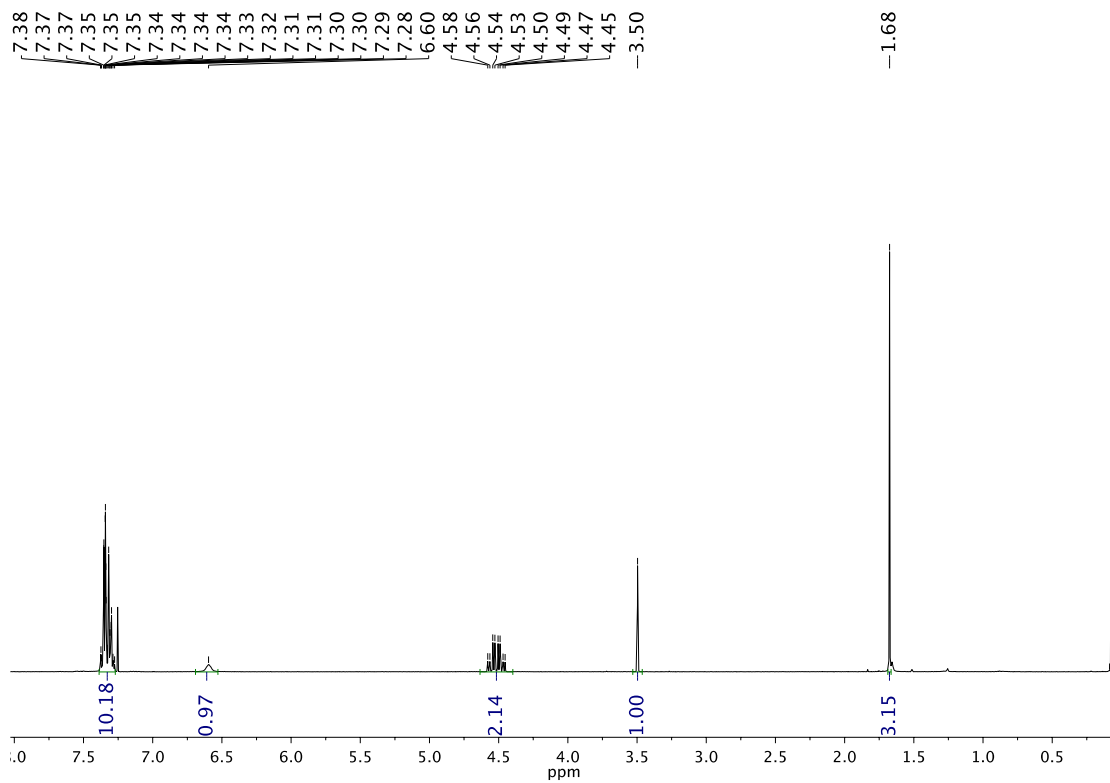

$^{13}\text{C-NMR}$  of **E11** in  $\text{CDCl}_3$

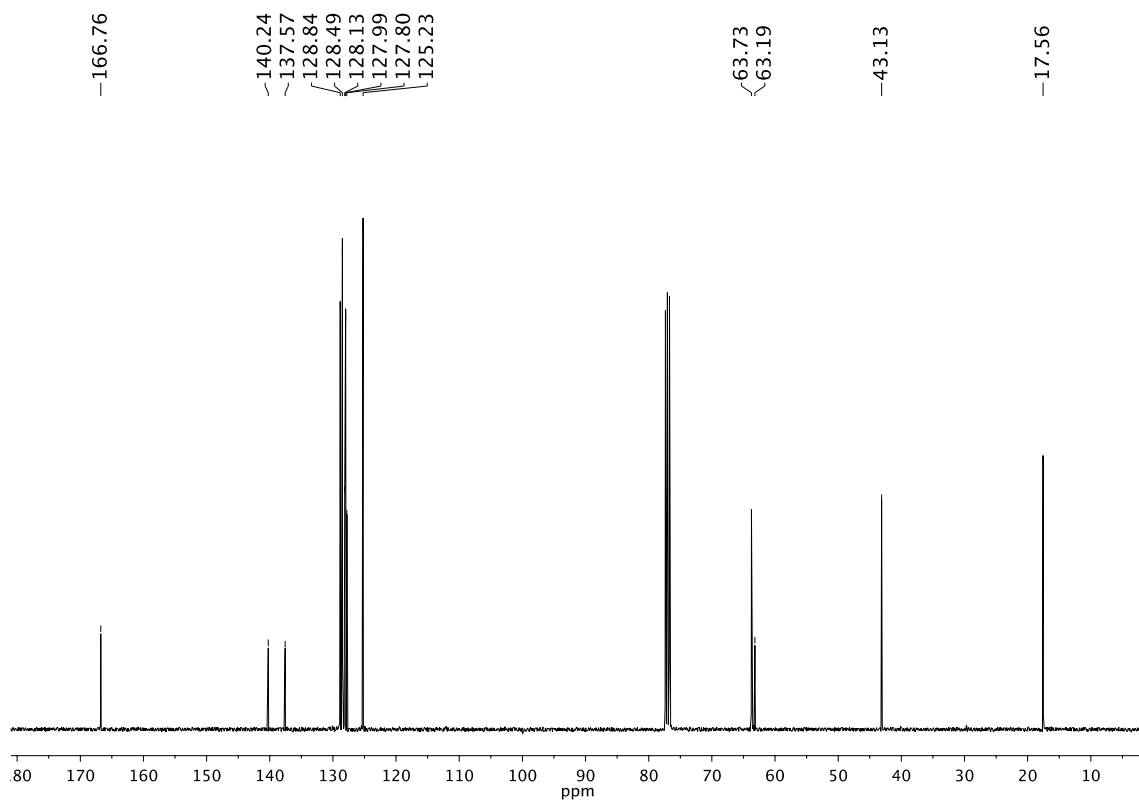

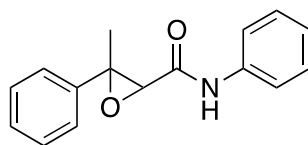

$^1\text{H-NMR}$  of **E12** in  $\text{CDCl}_3$

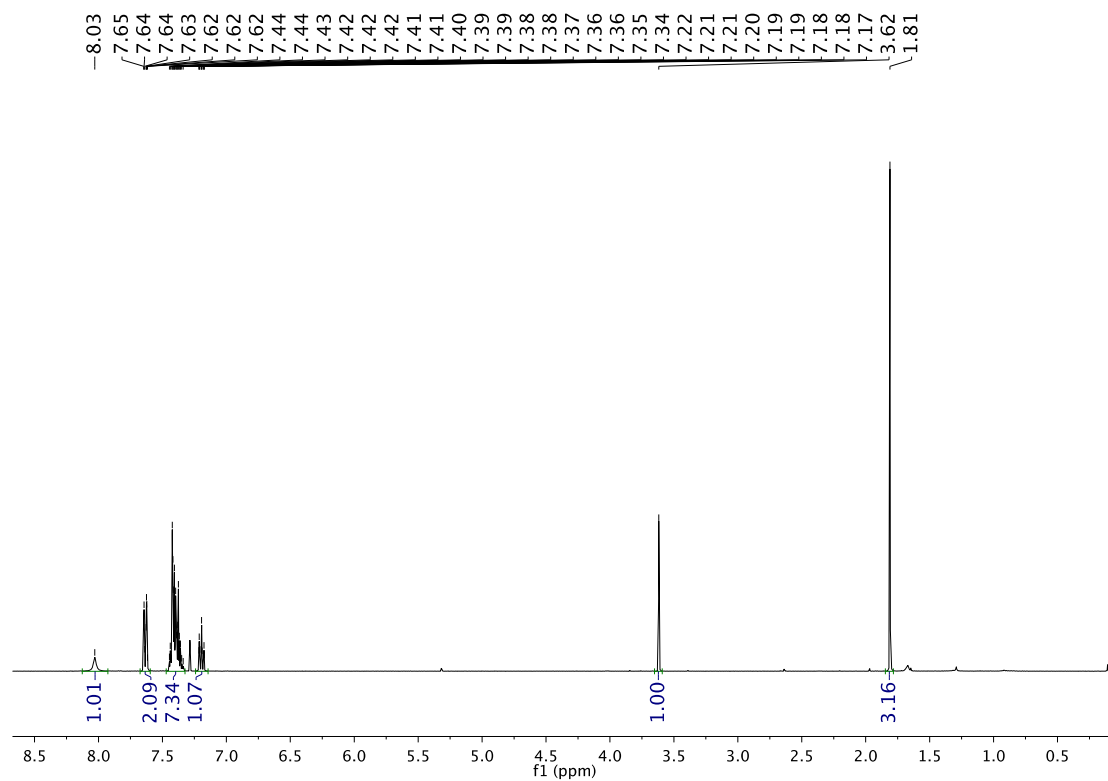

$^{13}\text{C-NMR}$  of **E12** in  $\text{CDCl}_3$

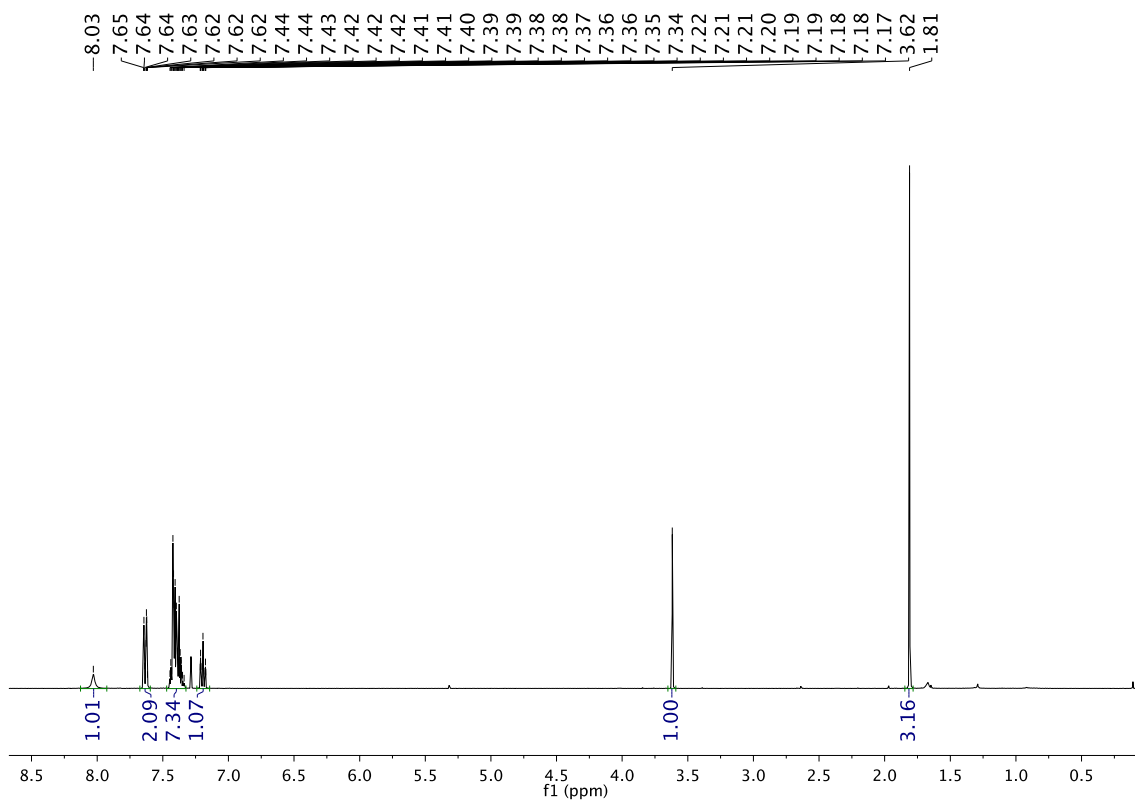

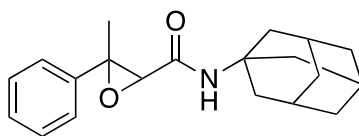

$^1\text{H-NMR}$  of **E13** in  $\text{CDCl}_3$

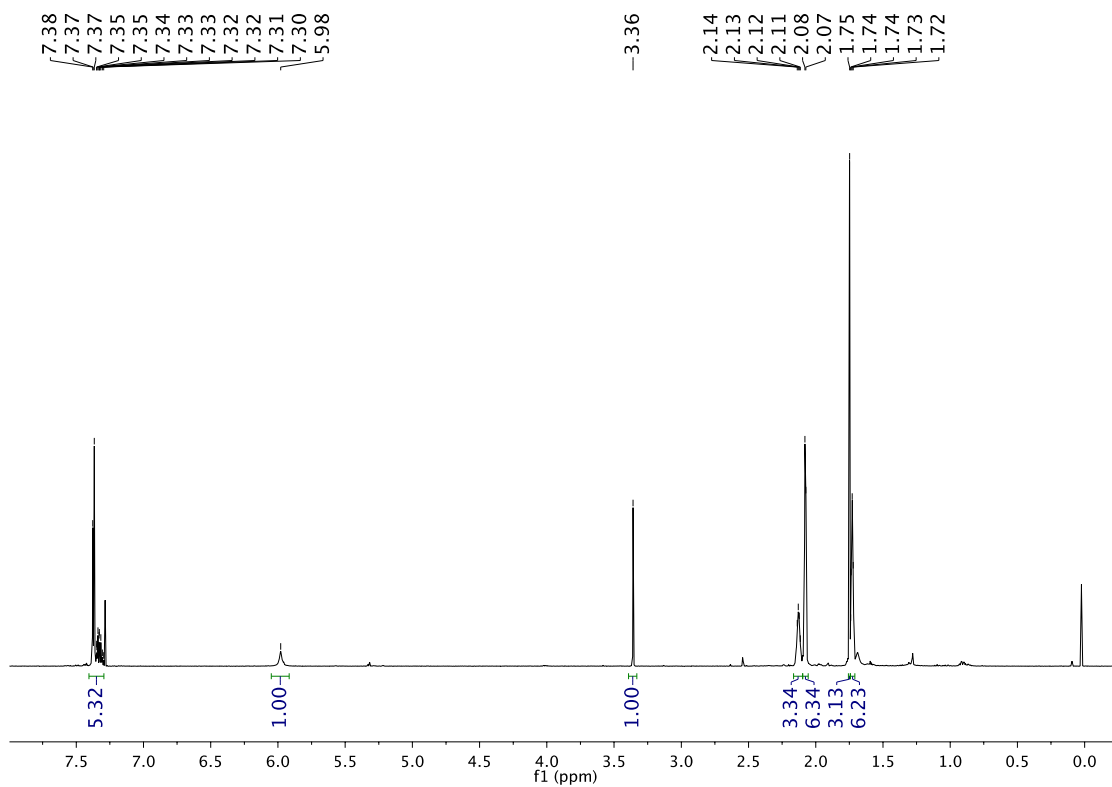

$^{13}\text{C-NMR}$  of **E13** in  $\text{CDCl}_3$

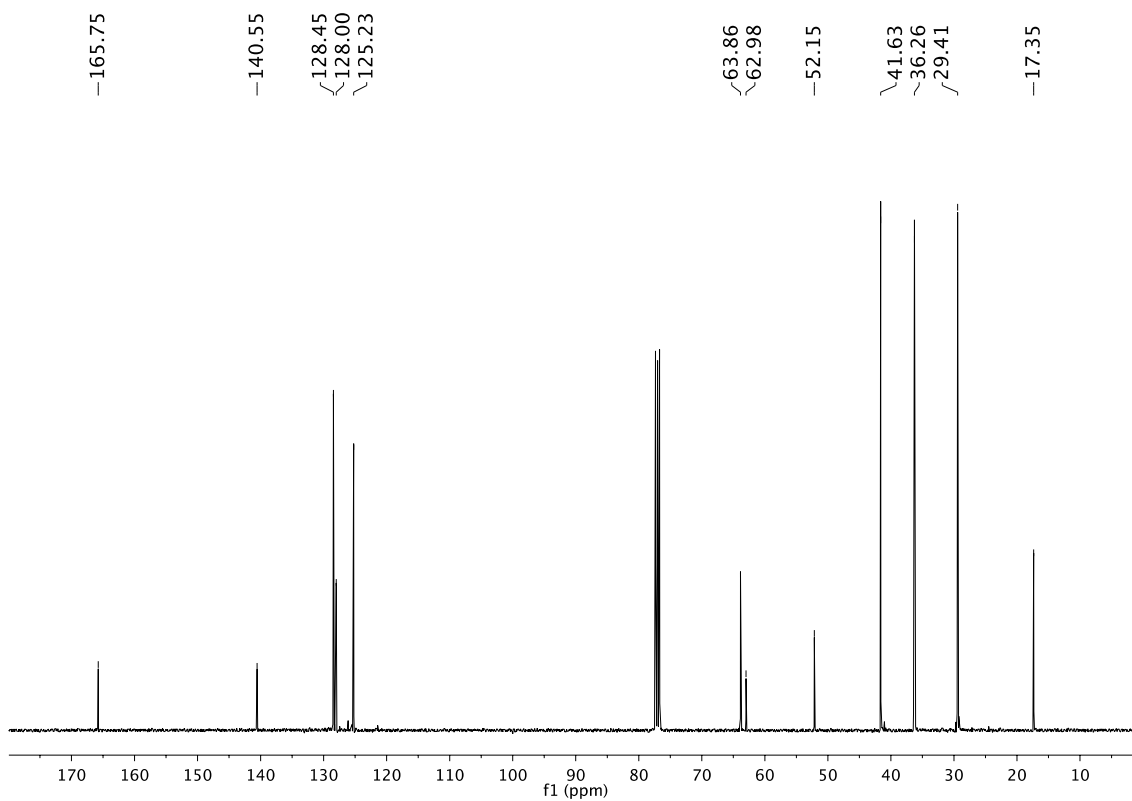

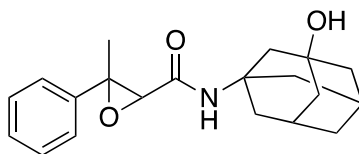

$^1\text{H-NMR}$  of **EO13** in  $\text{CDCl}_3$

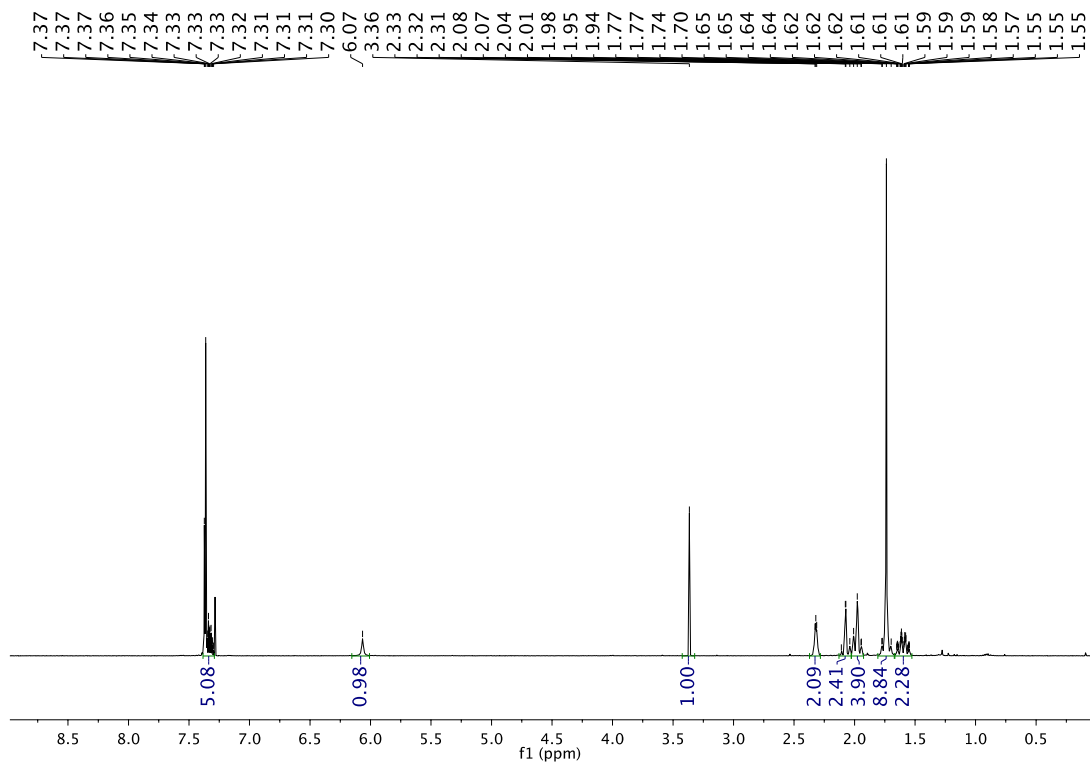

$^{13}\text{C-NMR}$  of **EO13** in  $\text{CDCl}_3$

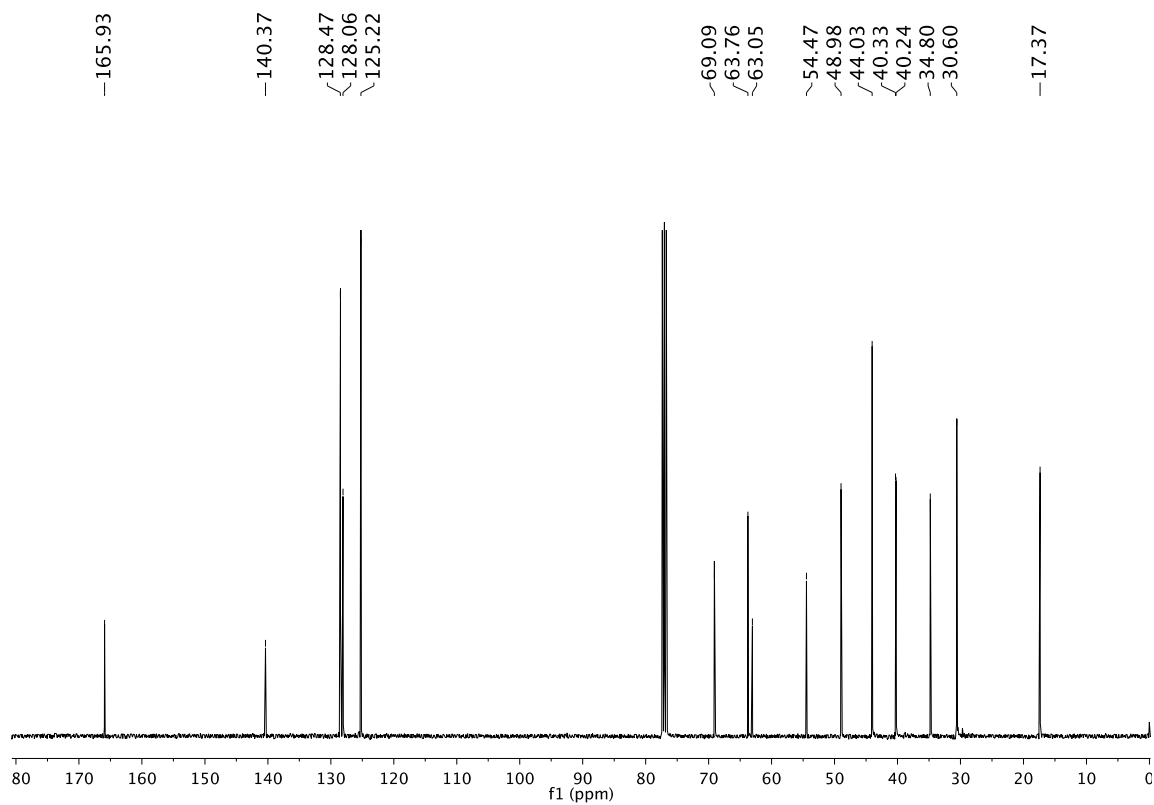

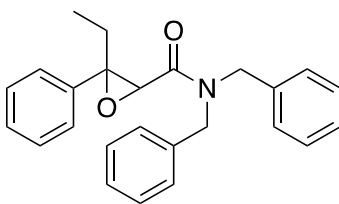

$^1\text{H-NMR}$  of **E14** in  $\text{CDCl}_3$

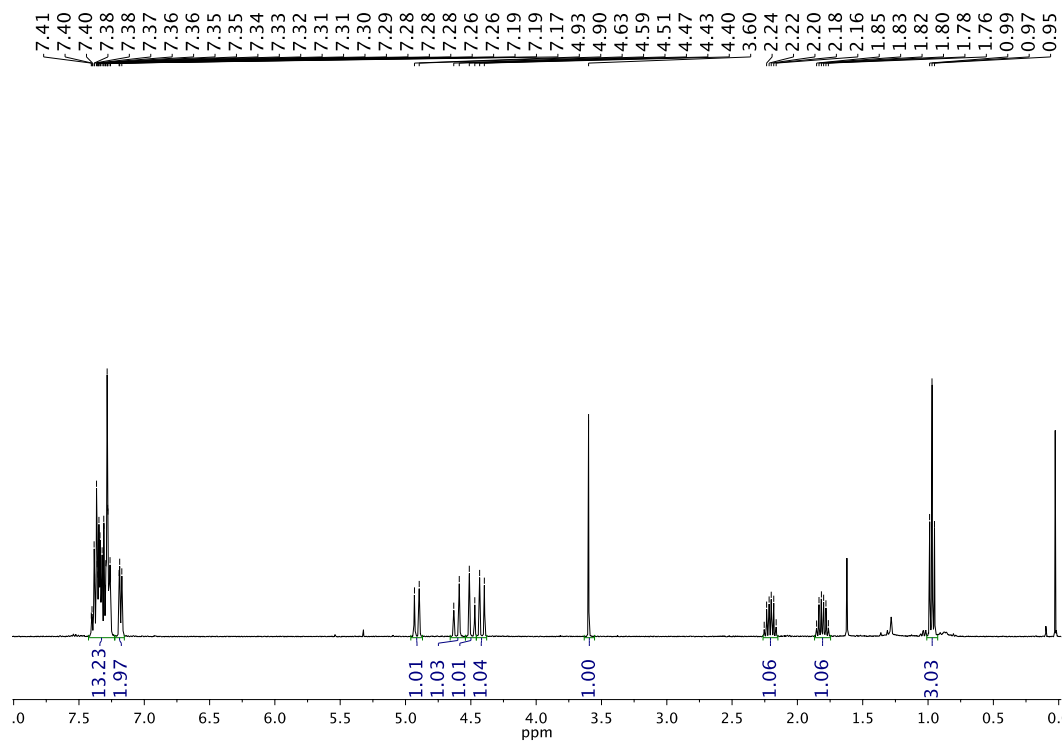

$^{13}\text{C-NMR}$  of **E14** in  $\text{CDCl}_3$

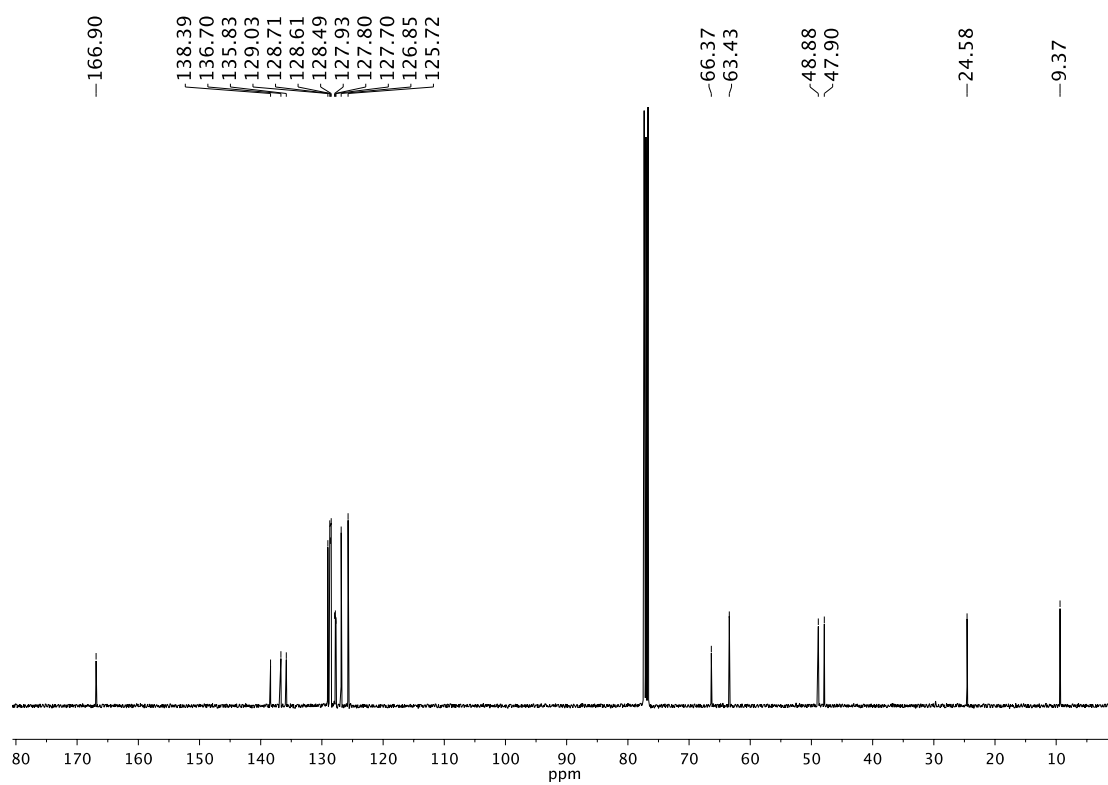

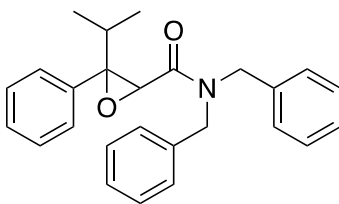

$^1\text{H-NMR}$  of **E15** in  $\text{CDCl}_3$

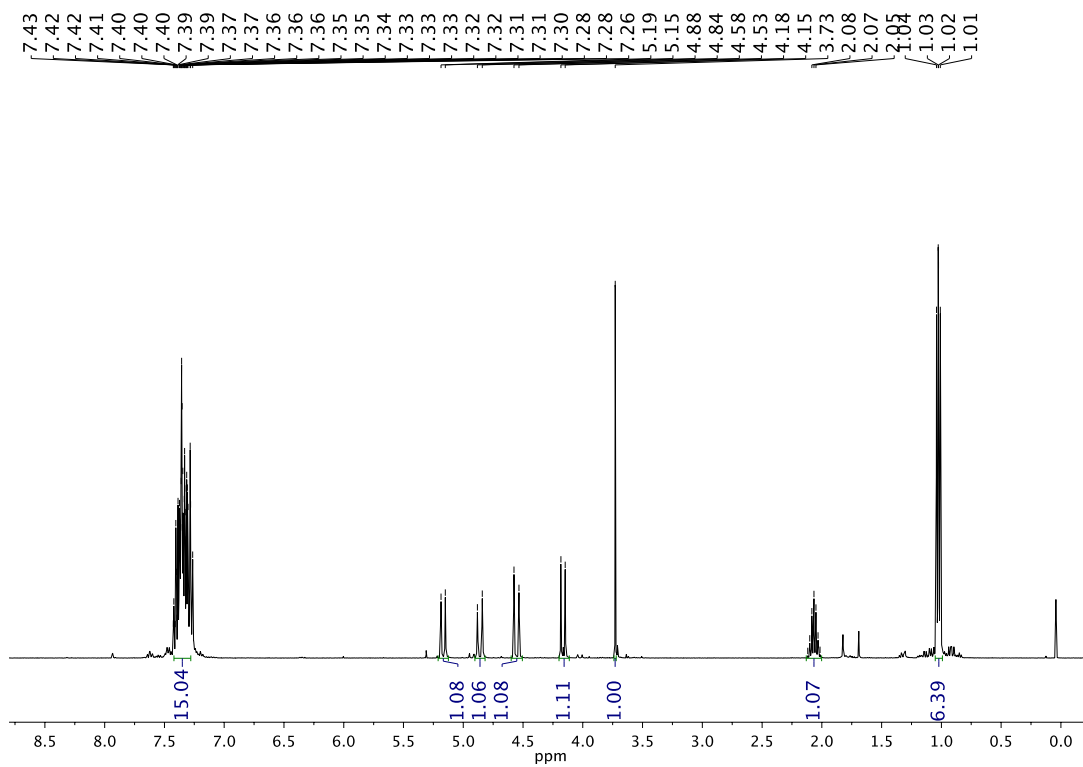

$^{13}\text{C-NMR}$  of **E15** in  $\text{CDCl}_3$

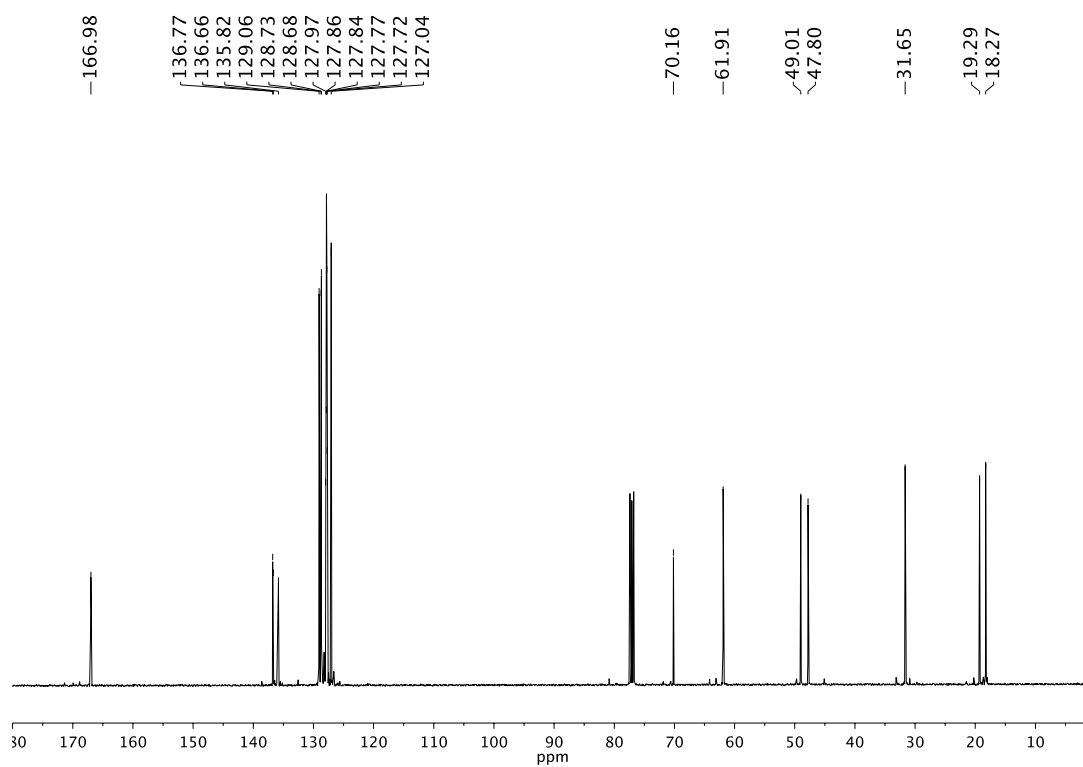

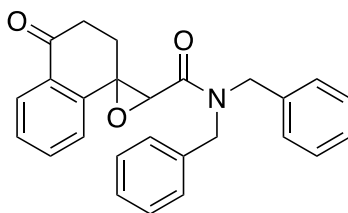

<sup>1</sup>H-NMR of EK16 in CDCl<sub>3</sub>

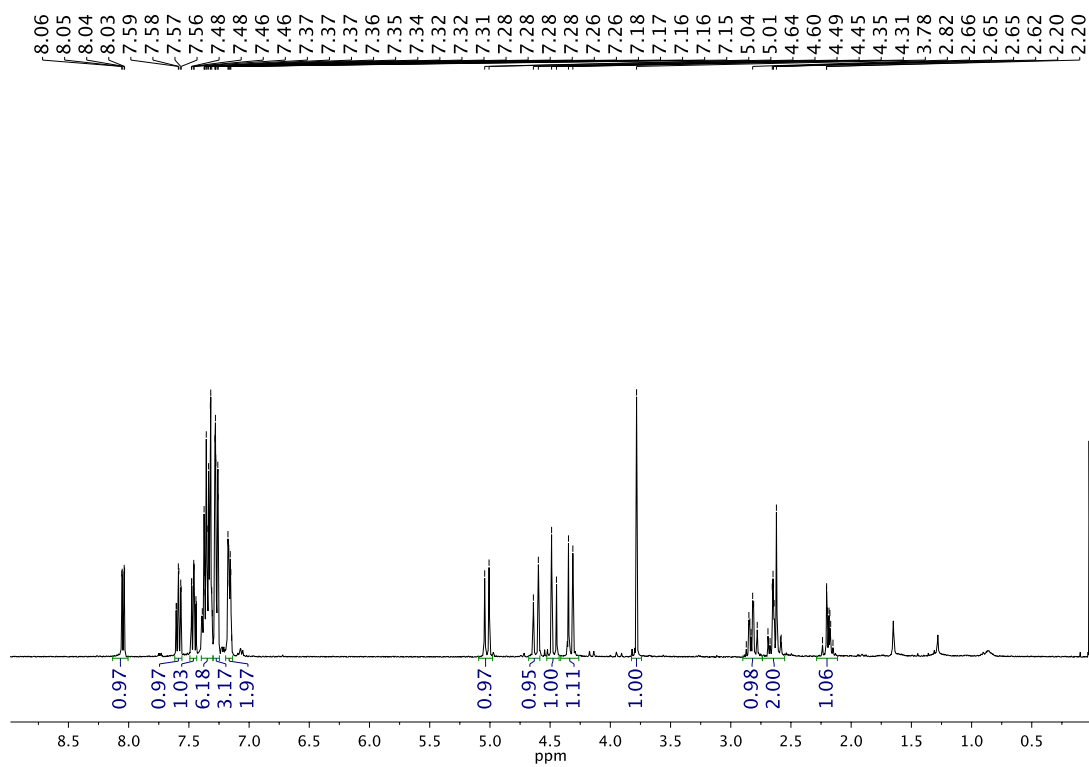

<sup>13</sup>C-NMR of EK16 in CDCl<sub>3</sub>

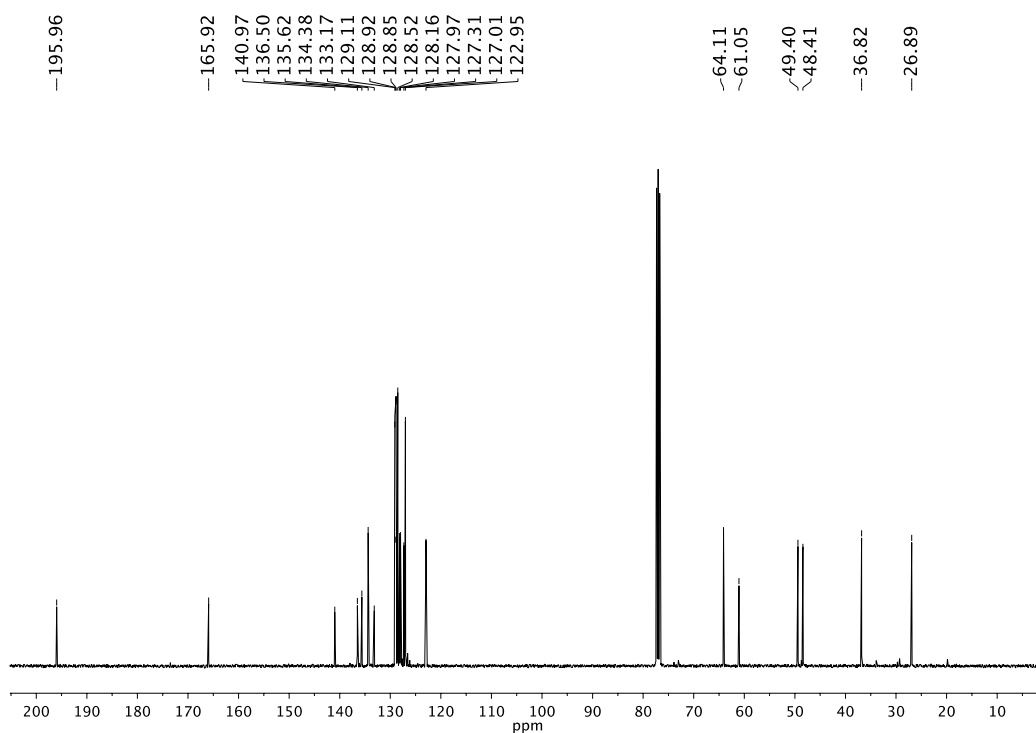

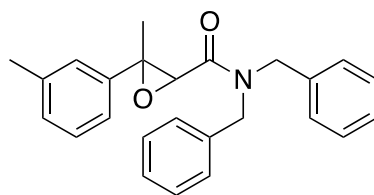

$^1\text{H-NMR}$  of **E18** in  $\text{CDCl}_3$

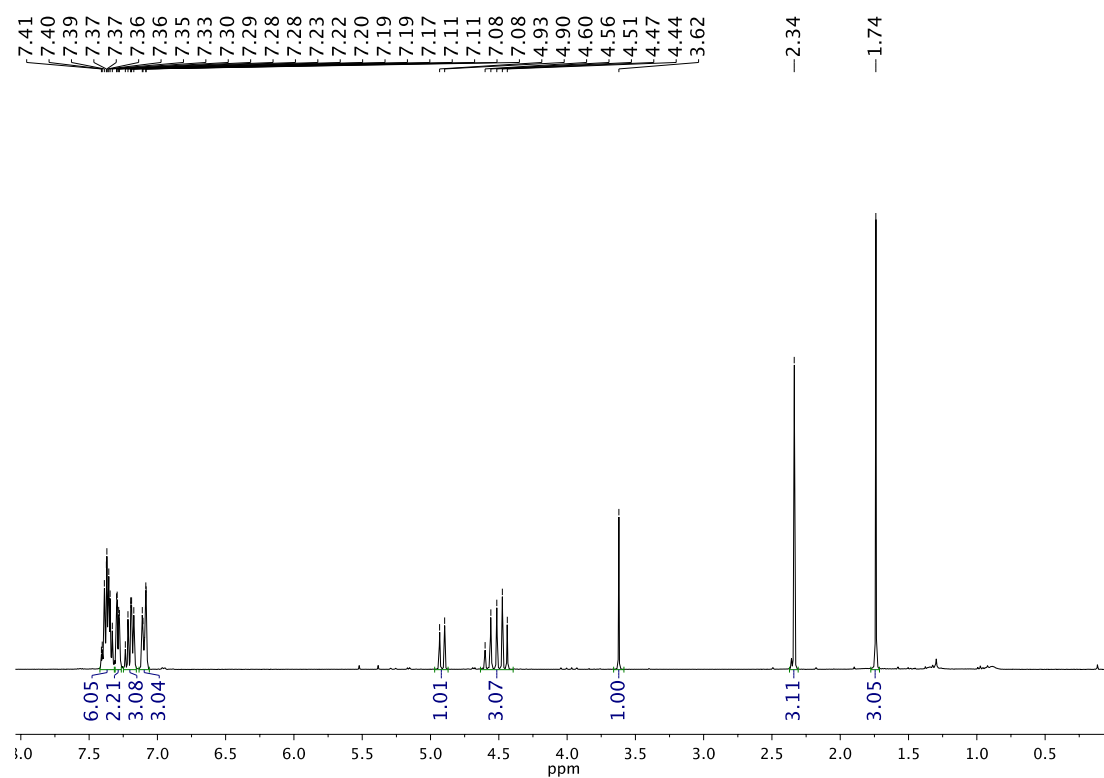

$^{13}\text{C-NMR}$  of **E18** in  $\text{CDCl}_3$

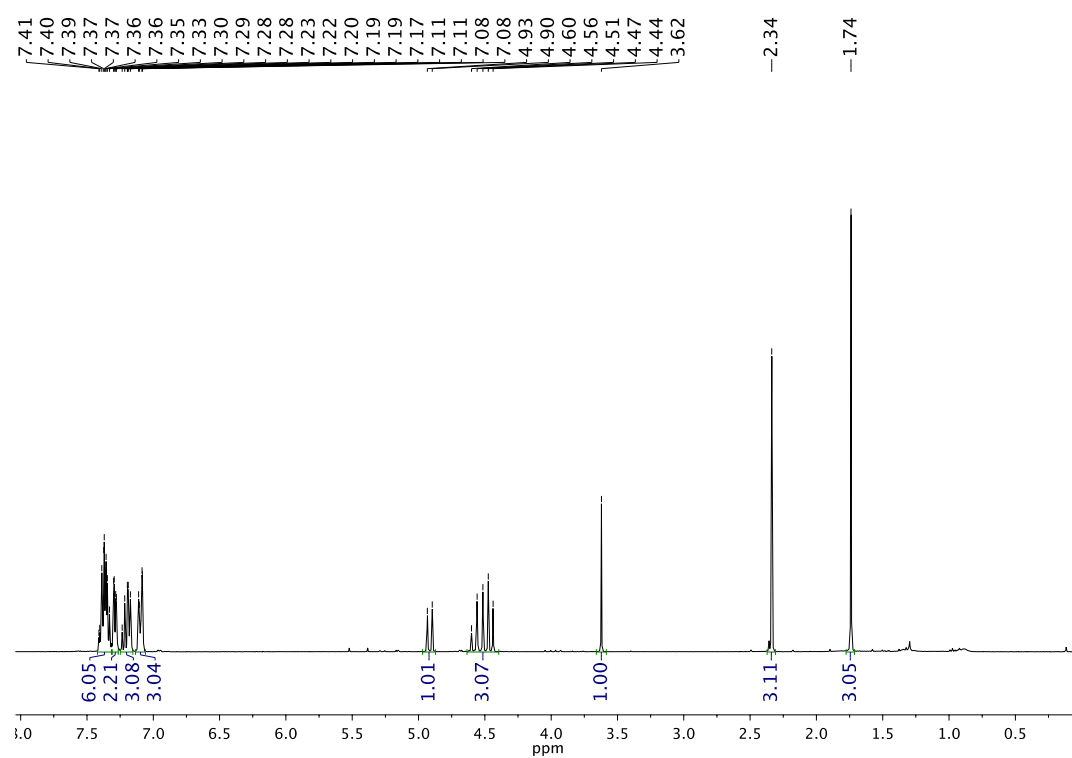

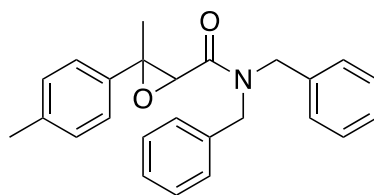

$^1\text{H-NMR}$  of **E19** in  $\text{CDCl}_3$

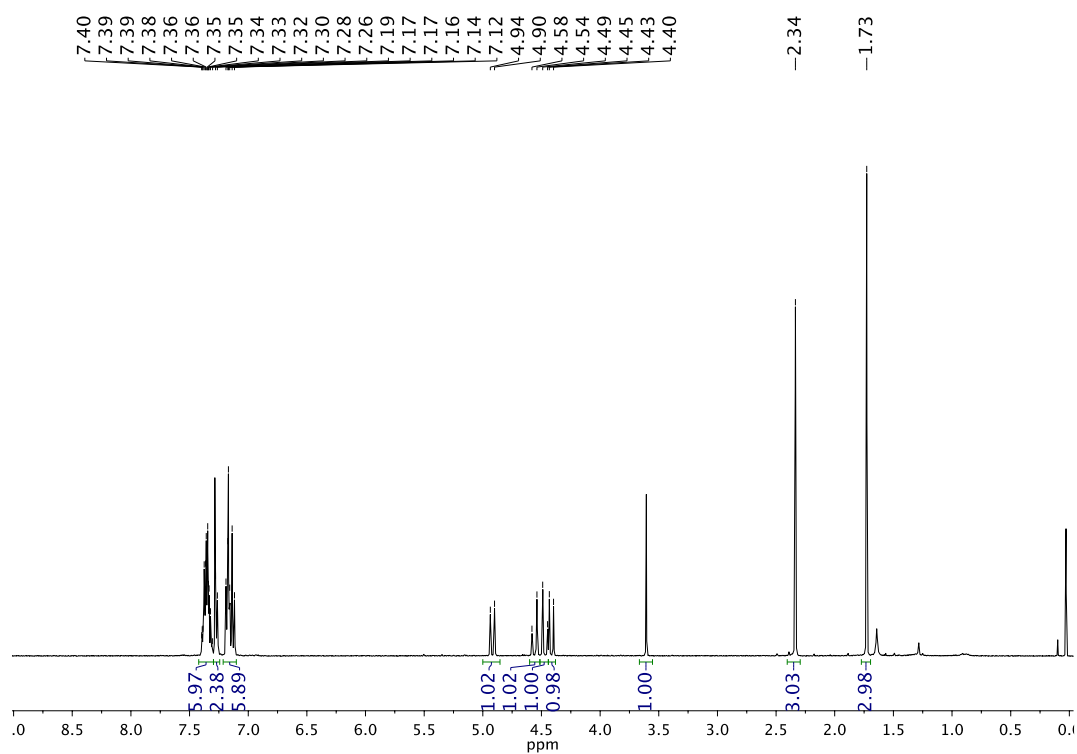

$^{13}\text{C-NMR}$  of **E19** in  $\text{CDCl}_3$

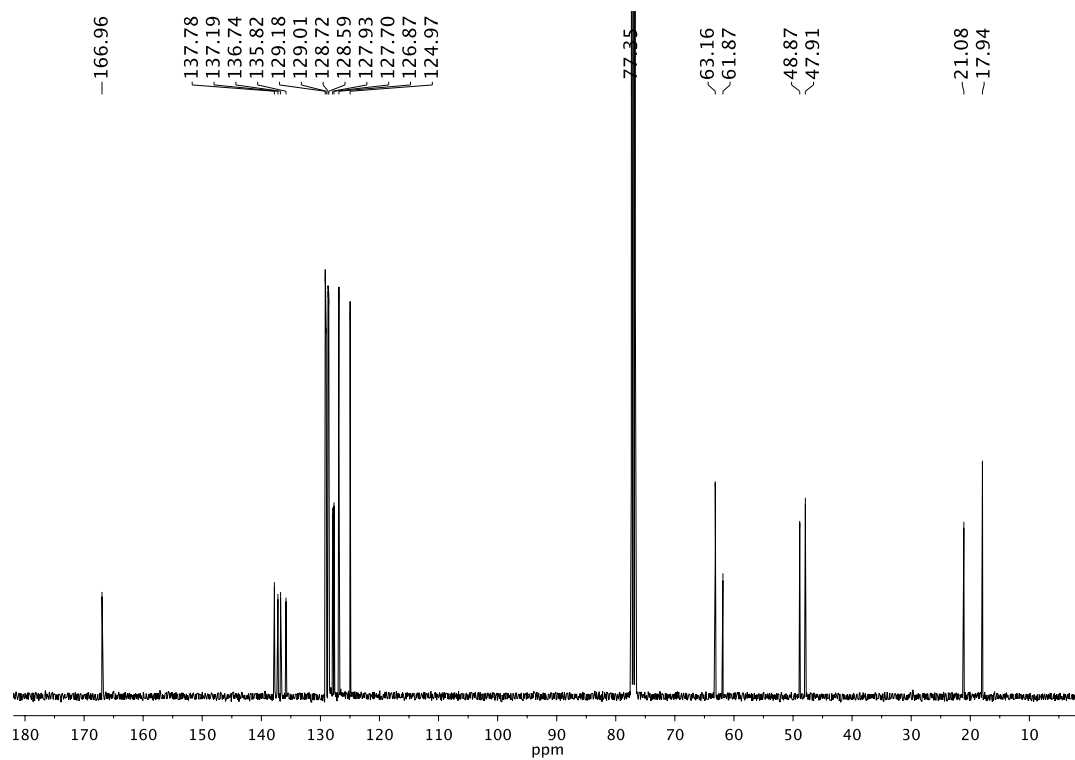

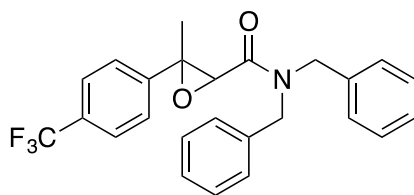

$^1\text{H-NMR}$  of **E20** in  $\text{CDCl}_3$

7.58  
7.56  
7.40  
7.39  
7.38  
7.37  
7.36  
7.35  
7.33  
7.30  
7.29  
7.28  
7.28  
7.17  
7.16  
7.15  
4.85  
4.81  
4.57  
4.54  
4.53  
-3.57  
-1.75

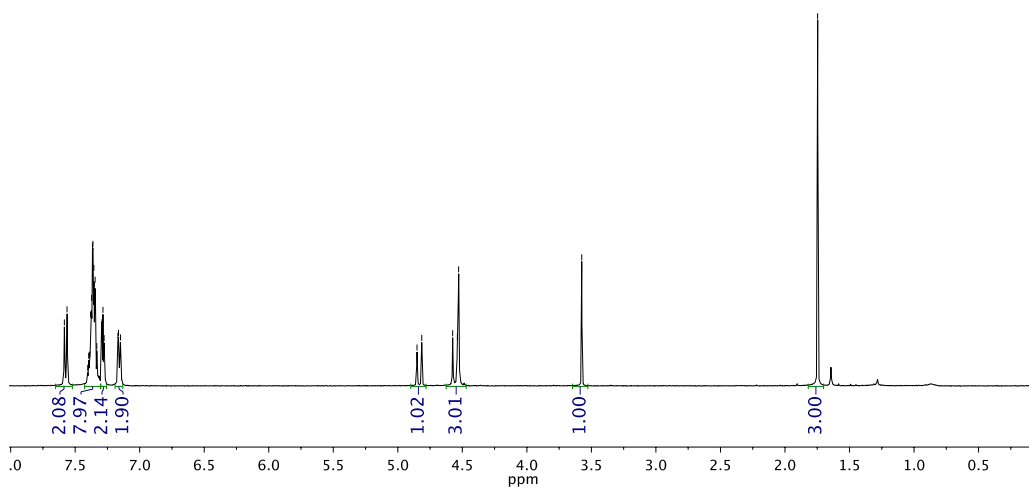

$^{13}\text{C-NMR}$  of **E20** in  $\text{CDCl}_3$

-166.36  
-144.14  
136.59  
135.81  
129.09  
128.78  
128.60  
128.04  
127.82  
126.70  
125.57  
125.53  
125.49  
62.92  
61.56  
49.06  
48.39  
-17.70

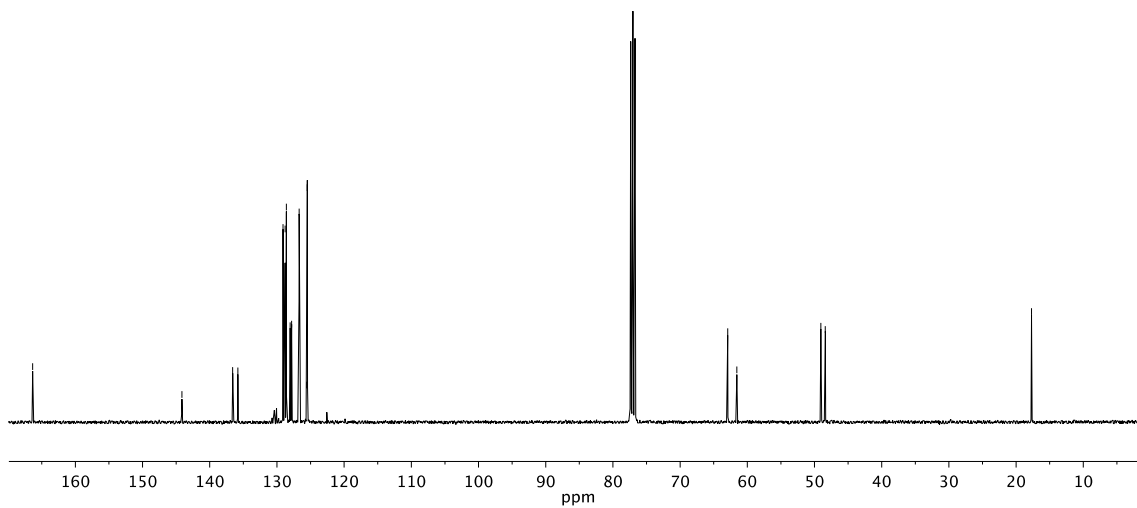

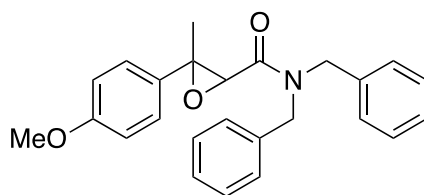

$^1\text{H-NMR}$  of **E21** in  $\text{CDCl}_3$

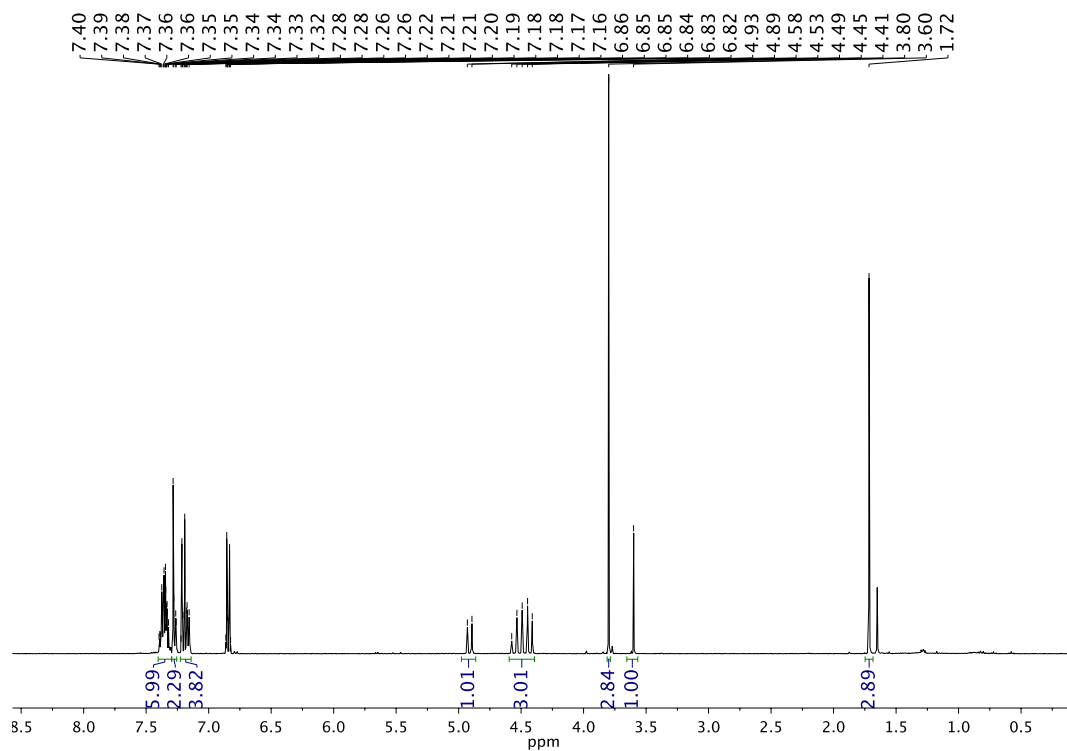

$^{13}\text{C-NMR}$  of **E21** in  $\text{CDCl}_3$

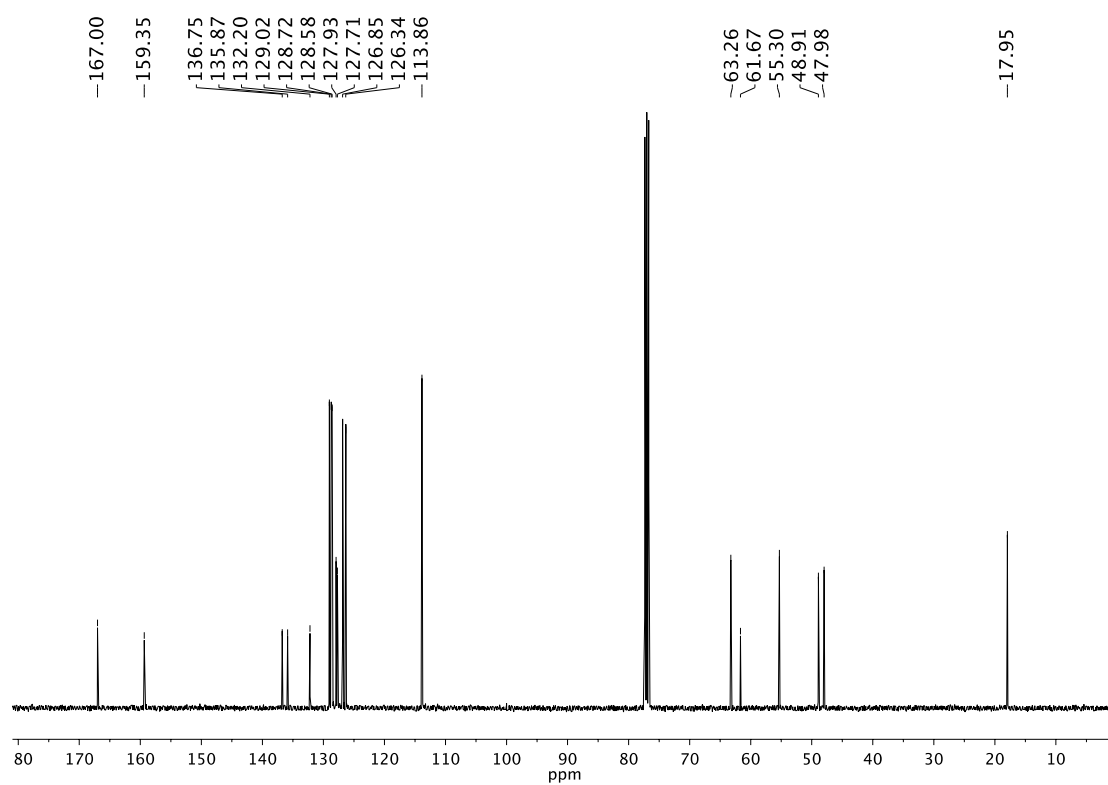

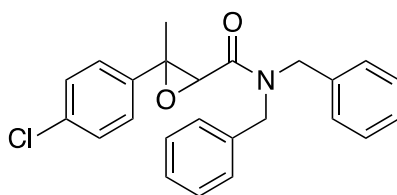

$^1\text{H-NMR}$  of **E22** in  $\text{CDCl}_3$

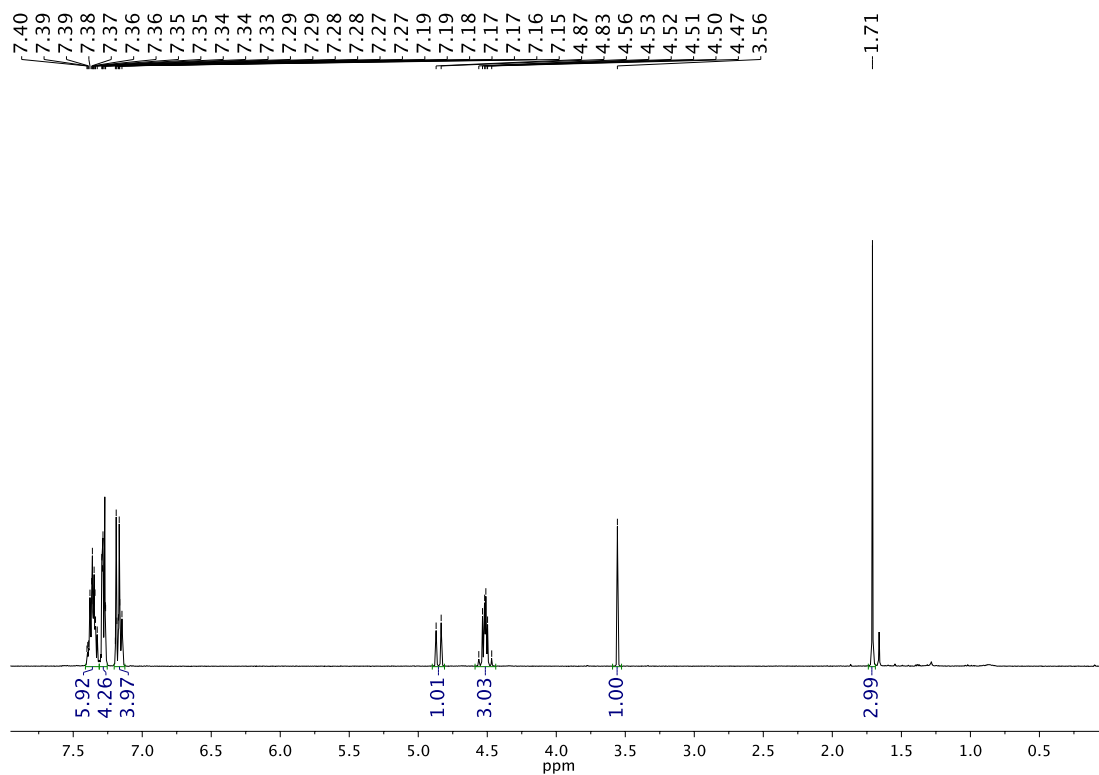

$^{13}\text{C-NMR}$  of **E22** in  $\text{CDCl}_3$

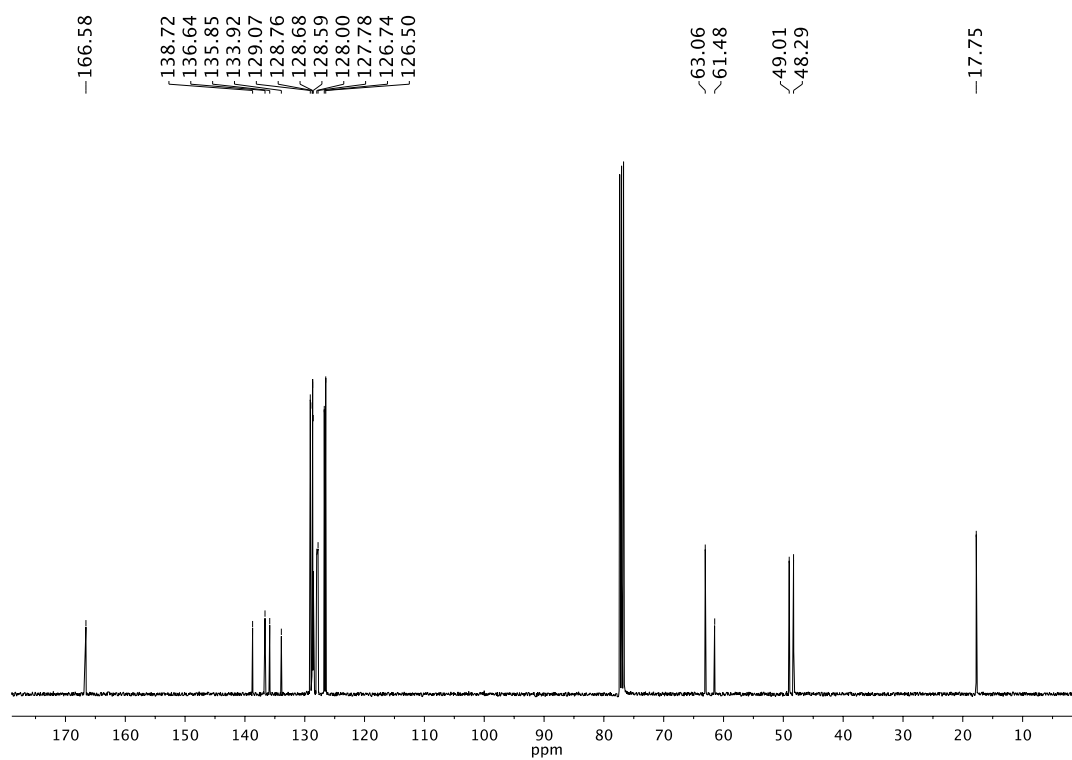

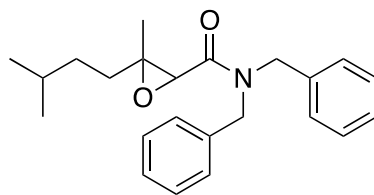

$^1\text{H-NMR}$  of **E25** in  $\text{CDCl}_3$

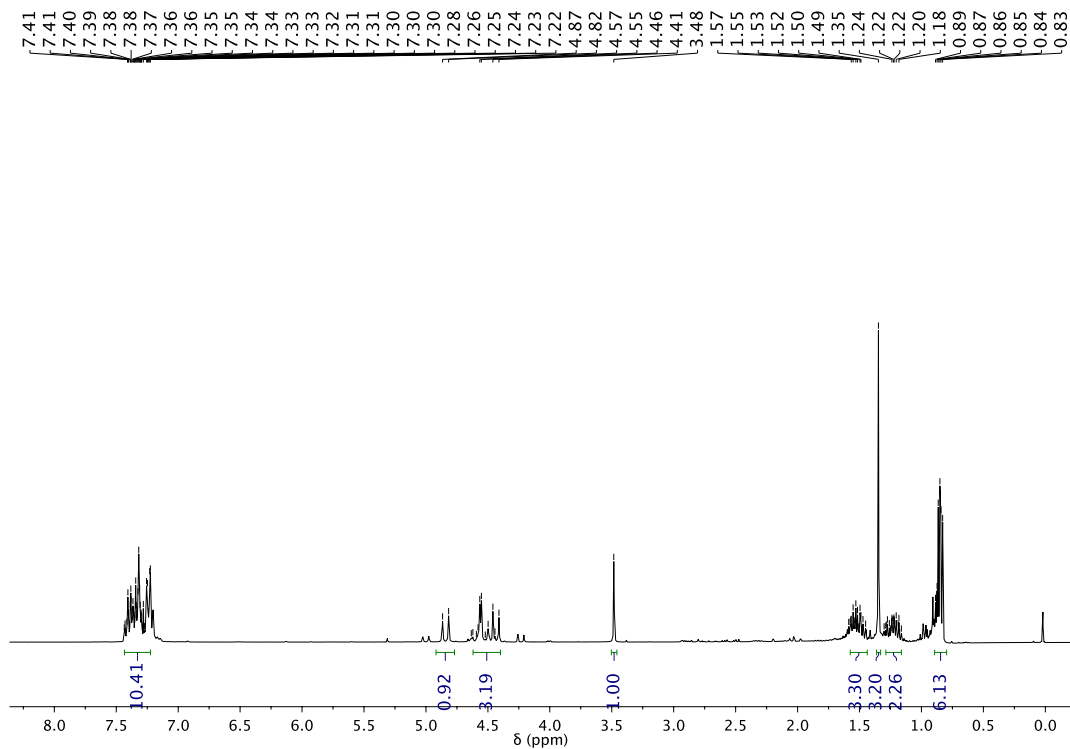

$^{13}\text{C-NMR}$  of **E25** in  $\text{CDCl}_3$

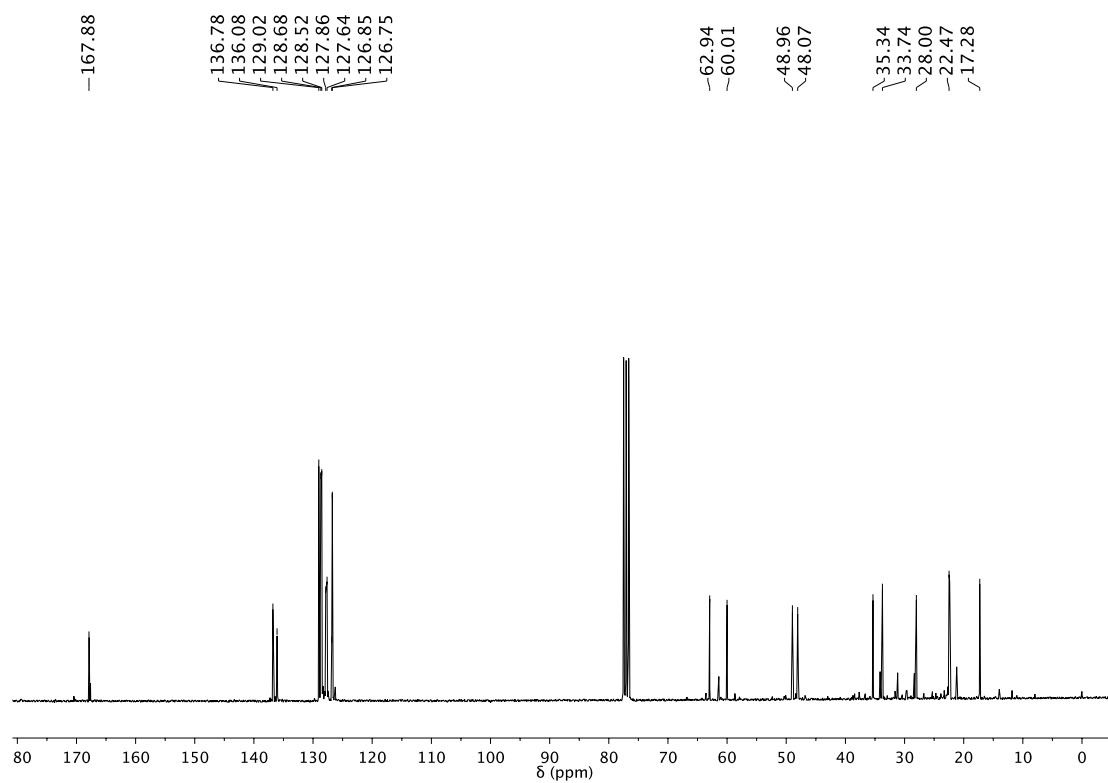

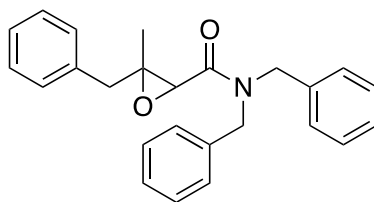

<sup>1</sup>H-NMR of **E26** in CDCl<sub>3</sub>

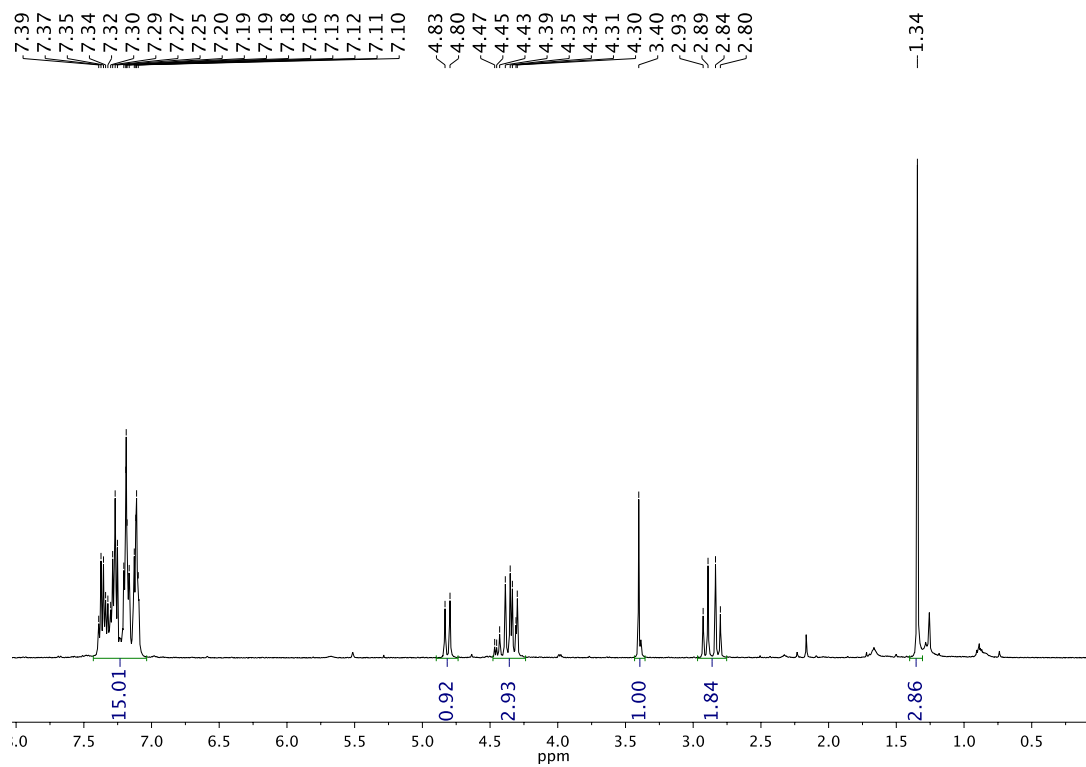

<sup>13</sup>C-NMR of **E26** in CDCl<sub>3</sub>

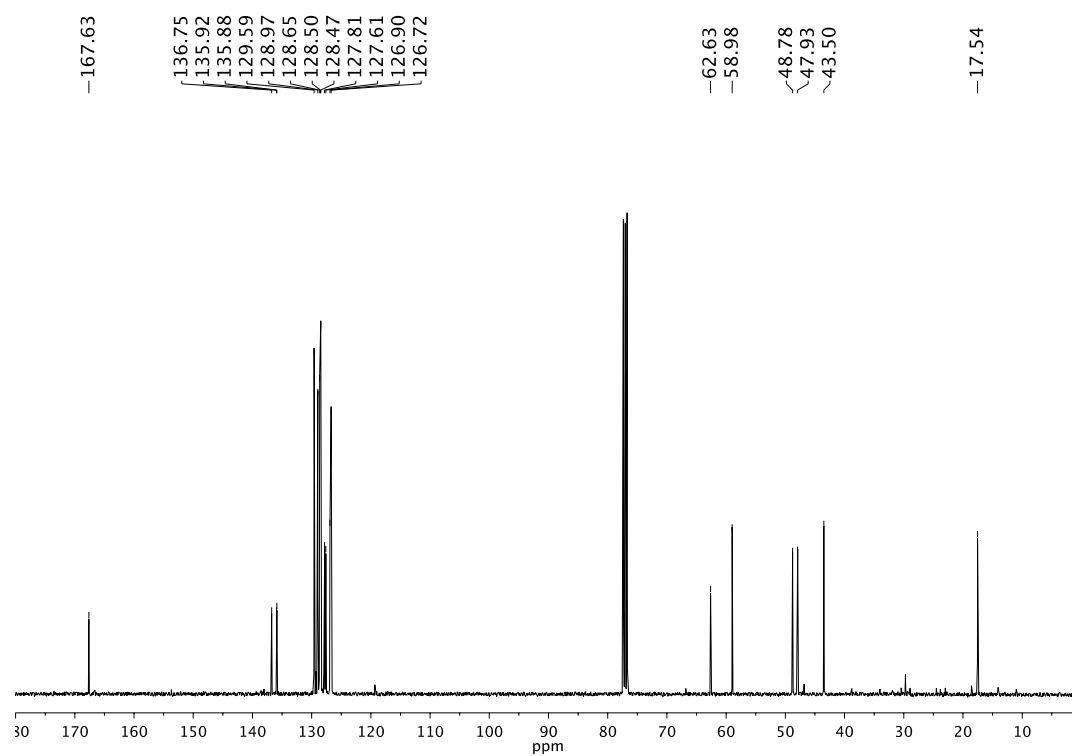

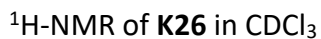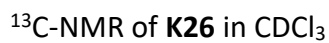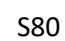

### 6.3) HPLC of products

HPLC analysis: Chiralpack IC, *n*-Hex:*i*PrOH = 80/20, 25°C, flow rate = 1.5 mL/min,  $\lambda$  = 220 nm,  $t_R$ (epoxide 1) = 18.8 min,  $t_R$ (epoxide 2) = 24.6 min

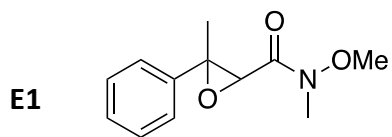

Racemic

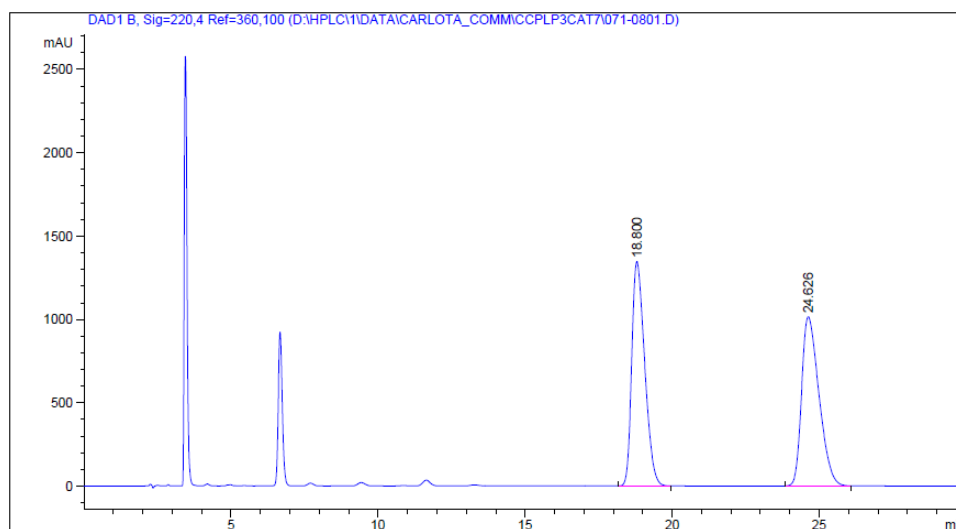

| Peak # | RetTime [min] | Sig | Type | Area [mAU*s] | Height [mAU] | Area %  |
|--------|---------------|-----|------|--------------|--------------|---------|
| 1      | 18.800        | 1   | BB   | 4.11784e4    | 1347.11108   | 49.7614 |
| 2      | 24.626        | 1   | BB   | 4.15734e4    | 1015.33740   | 50.2386 |

Table 1 entry 6

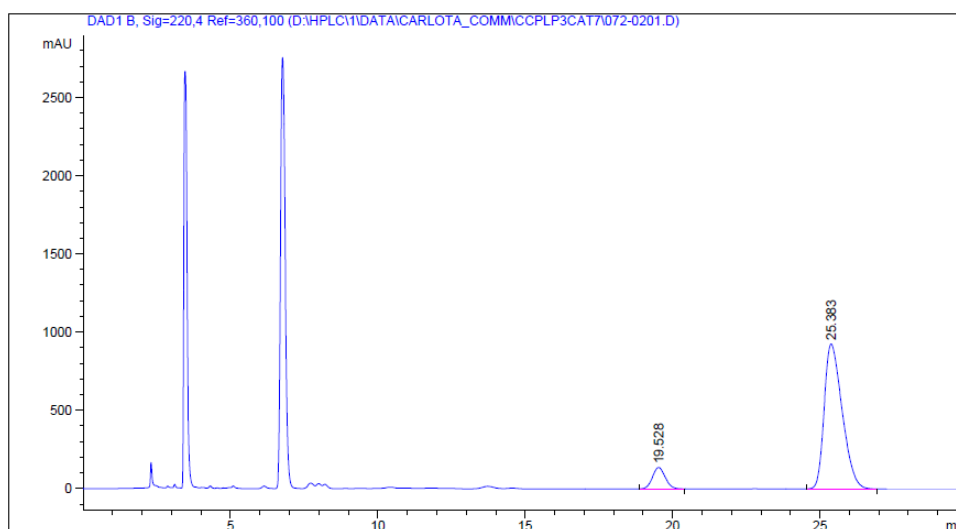

| Peak # | RetTime [min] | Sig | Type | Area [mAU*s] | Height [mAU] | Area %  |
|--------|---------------|-----|------|--------------|--------------|---------|
| 1      | 19.523        | 1   | BB   | 3512.89844   | 117.43418    | 9.2651  |
| 2      | 25.396        | 1   | BB   | 3.44026e4    | 824.78369    | 90.7349 |

HPLC analysis: Chiralpack IC, *n*-Hex:*i*PrOH = 85/15, 25°C, flow rate = 1 mL/min,  $\lambda$  = 220 nm,  $t_R$ (epoxide 1) = 6.8 min,  $t_R$ (epoxide 2) = 8.1 min

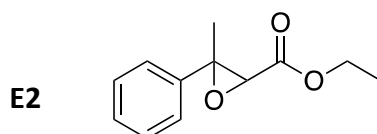

Racemic

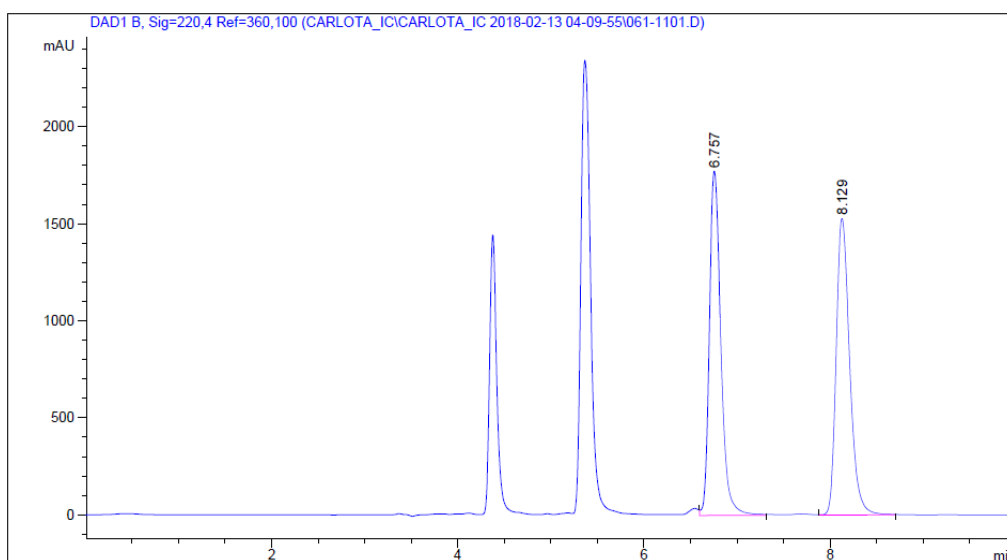

| Peak # | RetTime [min] | Sig | Type | Area [mAU*s] | Height [mAU] | Area %  |
|--------|---------------|-----|------|--------------|--------------|---------|
| 1      | 6.757         | 1   | VB   | 1.51438e4    | 1772.59021   | 49.6569 |
| 2      | 8.129         | 1   | VB   | 1.53531e4    | 1526.95422   | 50.3431 |

Table 1 entry 12

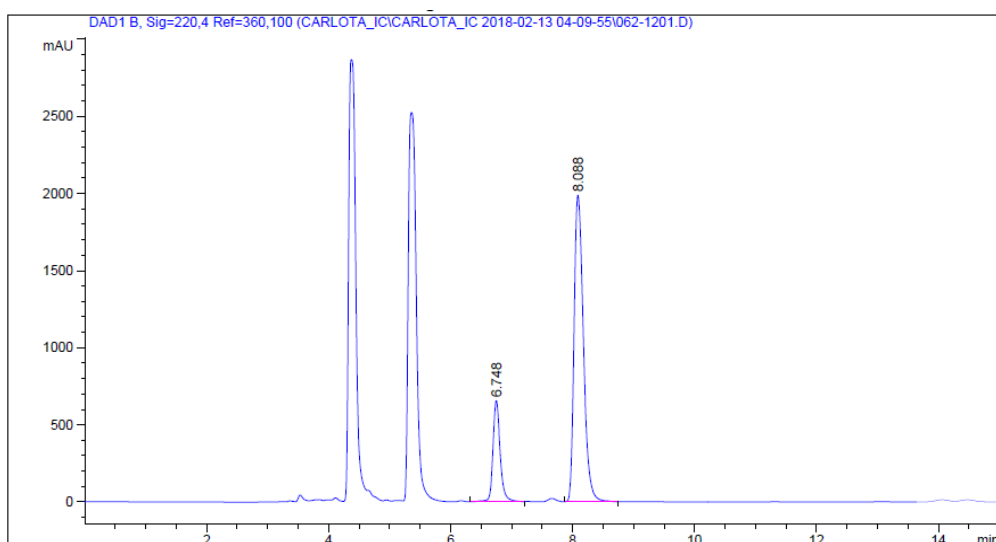

| Peak # | RetTime [min] | Sig | Type | Area [mAU*s] | Height [mAU] | Area %  |
|--------|---------------|-----|------|--------------|--------------|---------|
| 1      | 6.748         | 1   | VB   | 5398.91650   | 654.49652    | 20.3683 |
| 2      | 8.088         | 1   | VB   | 2.11075e4    | 1986.78088   | 79.6317 |

HPLC analysis: Chiralpack IC, *n*-Hex:*i*PrOH = 70/30, 25°C, flow rate = 1.5 mL/min,  $\lambda$  = 220 nm,  $t_R$ (epoxide 1) = 13.6 min,  $t_R$ (epoxide 2) = 21.4 min

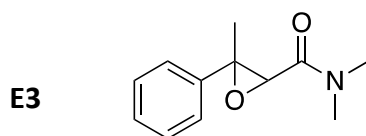

Racemic

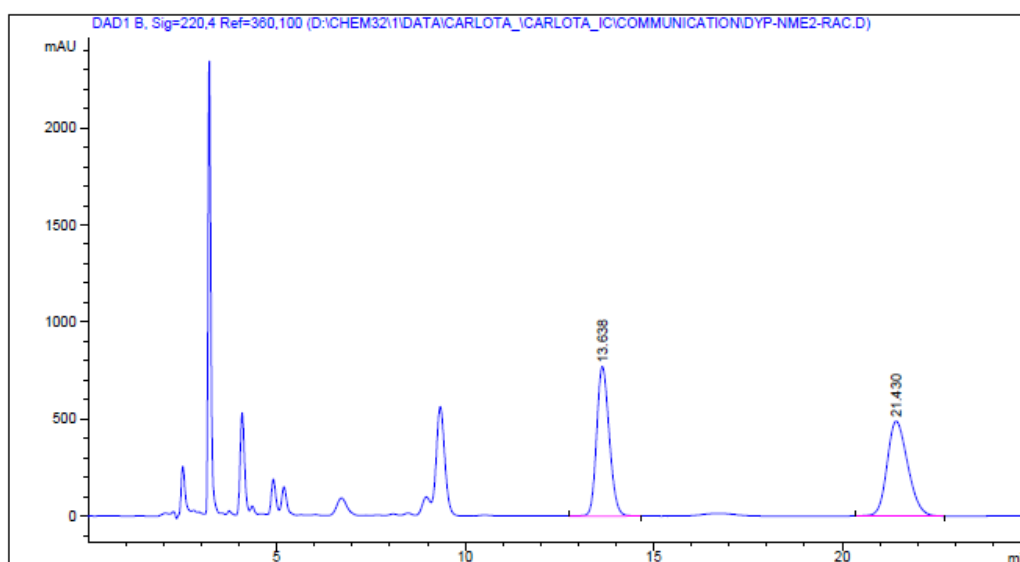

| Peak # | RetTime [min] | Sig | Type | Area [mAU*s] | Height [mAU] | Area %  |
|--------|---------------|-----|------|--------------|--------------|---------|
| 1      | 13.638        | 1   | VB   | 1.80679e4    | 771.54340    | 49.1032 |
| 2      | 21.430        | 1   | BB   | 1.87279e4    | 489.59921    | 50.8968 |

Table 2 entry 1

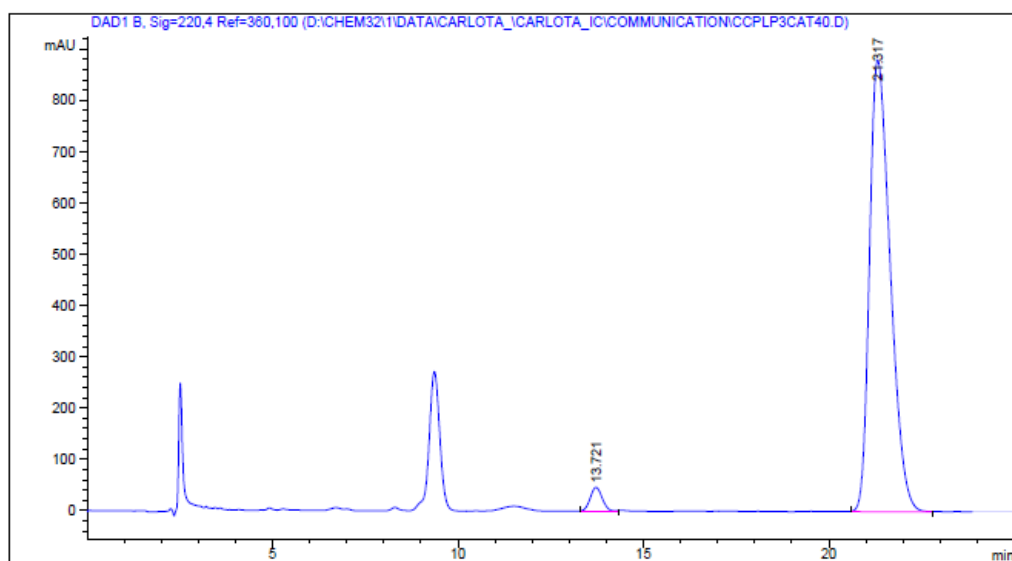

| Peak # | RetTime [min] | Sig | Type | Area [mAU*s] | Height [mAU] | Area %  |
|--------|---------------|-----|------|--------------|--------------|---------|
| 1      | 13.721        | 1   | BB   | 1027.15967   | 46.21970     | 2.9187  |
| 2      | 21.317        | 1   | BB   | 3.41651e4    | 880.51752    | 97.0813 |

HPLC analysis: Chiralpack IC, *n*-Hex:*i*PrOH = 80/20, 25°C, flow rate = 1 mL/min,  $\lambda$  = 220 nm,  $t_R$ (epoxide 1) = 27.6 min,  $t_R$ (epoxide 2) = 29.2 min

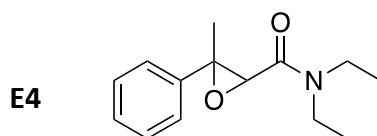

Racemic

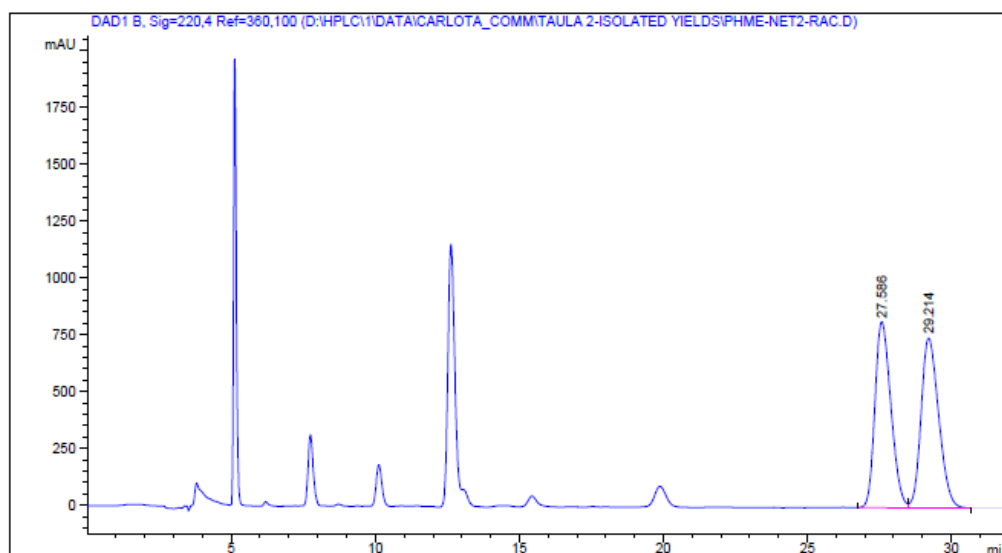

| Peak # | RetTime [min] | Sig | Type | Area [mAU*s] | Height [mAU] | Area %  |
|--------|---------------|-----|------|--------------|--------------|---------|
| 1      | 27.586        | 1   | BV   | 3.14809e4    | 817.74231    | 49.8199 |
| 2      | 29.214        | 1   | VB   | 3.17084e4    | 746.91663    | 50.1801 |

Table 2 entry 2

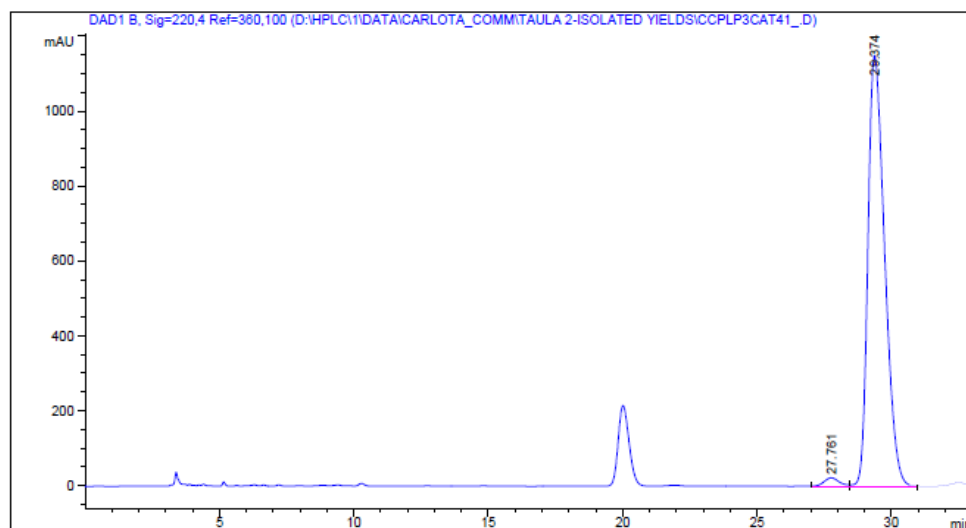

| Peak # | RetTime [min] | Sig | Type | Area [mAU*s] | Height [mAU] | Area %  |
|--------|---------------|-----|------|--------------|--------------|---------|
| 1      | 27.529        | 1   | BV   | 1178.49048   | 31.06512     | 2.0298  |
| 2      | 28.819        | 1   | VB   | 5.68811e4    | 1314.43506   | 97.9702 |

HPLC analysis: Chiralpack IC, n-Hex:iPrOH = 80/20, flow rate = 1 mL/min,  $\lambda$  = 220 nm, 25°C, t.r.e1 = 16.6 min, t.r.e2 = 18.9 min.

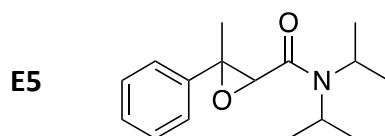

Racemic

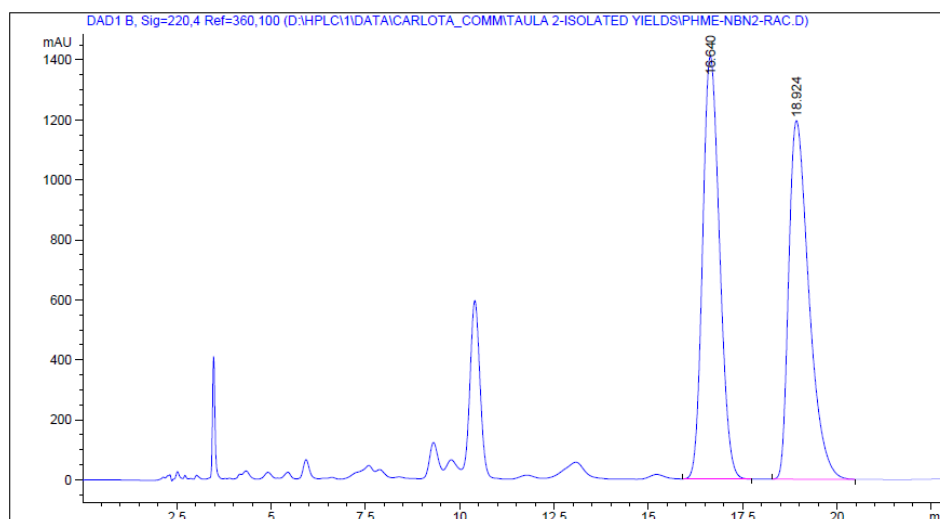

| Peak # | RetTime [min] | Sig | Type | Area [mAU*s] | Height [mAU] | Area %  |
|--------|---------------|-----|------|--------------|--------------|---------|
| 1      | 16.640        | 1   | VB   | 4.40184e4    | 1410.32996   | 49.7785 |
| 2      | 18.924        | 1   | BB   | 4.44101e4    | 1195.04138   | 50.2215 |

Table 2 entry 3

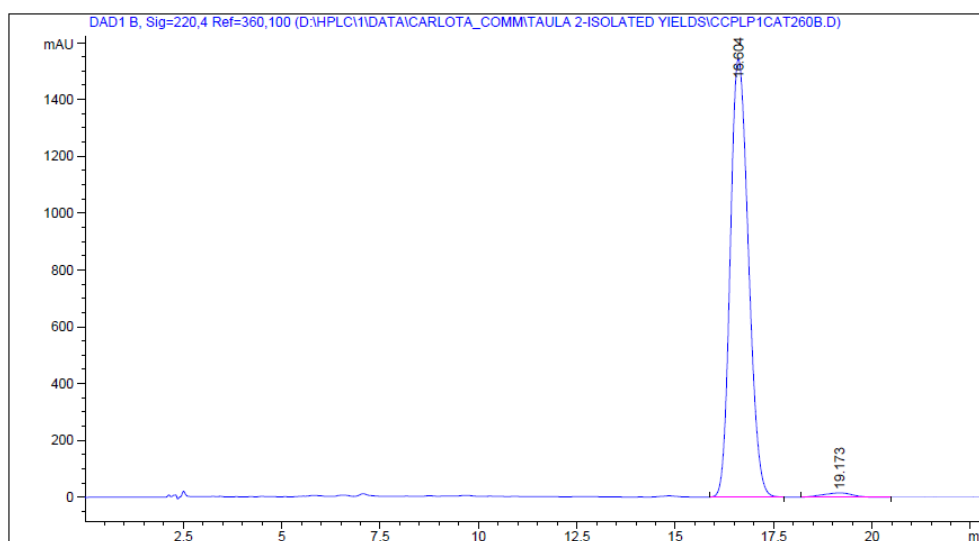

| Peak # | RetTime [min] | Sig | Type | Area [mAU*s] | Height [mAU] | Area %  |
|--------|---------------|-----|------|--------------|--------------|---------|
| 1      | 16.604        | 1   | BB   | 4.94818e4    | 1542.41870   | 98.5111 |
| 2      | 19.173        | 1   | BB   | 747.89185    | 14.96057     | 1.4889  |

HPLC analysis: Chiralpack IC, *n*-Hex:*i*PrOH = 80/20, 25°C, flow rate = 1 mL/min,  $\lambda$  = 220 nm,  $t_R$ (epoxide 1) = 16.9 min,  $t_R$ (epoxide 2) = 19.6 min

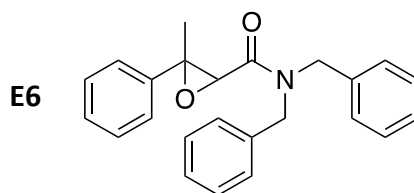

Racemic

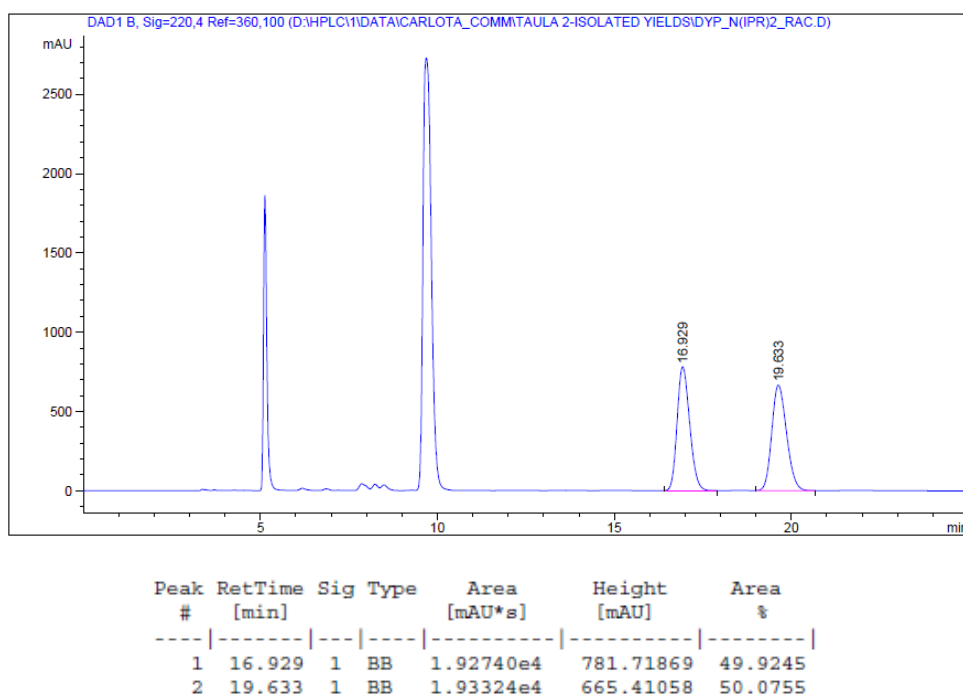

Table 2 entry 4

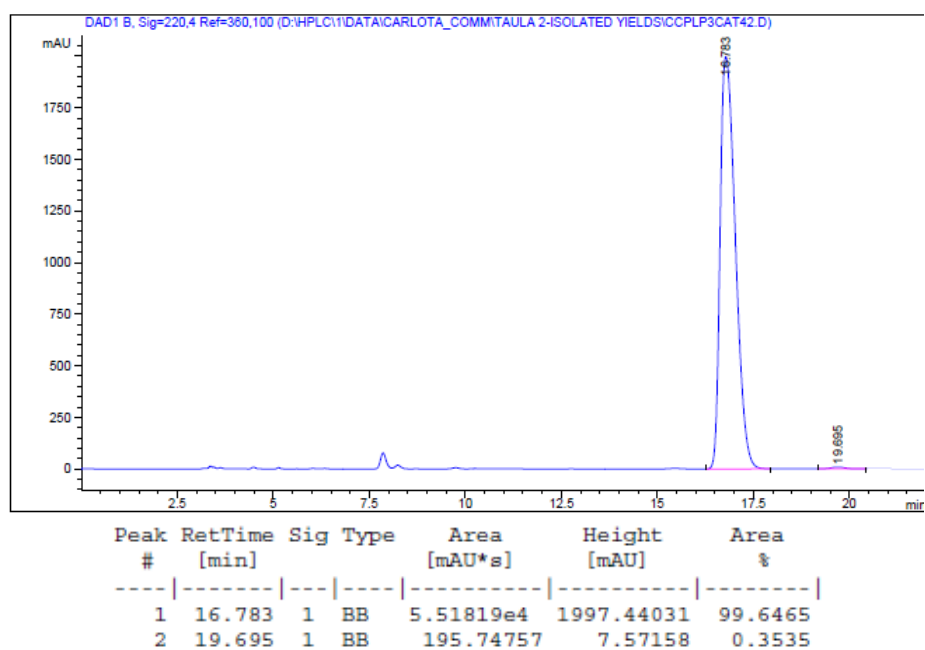

HPLC analysis: Chiralpack IC, n-Hex:iPrOH = 70/30, flow rate = 1.5 mL/min,  $\lambda$  = 220 nm, 25°C, t.r.e1 = 14.3 min, t.r.e2 = 20.7 min.

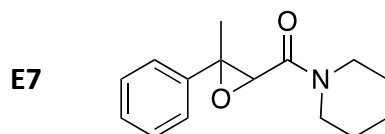

Racemic

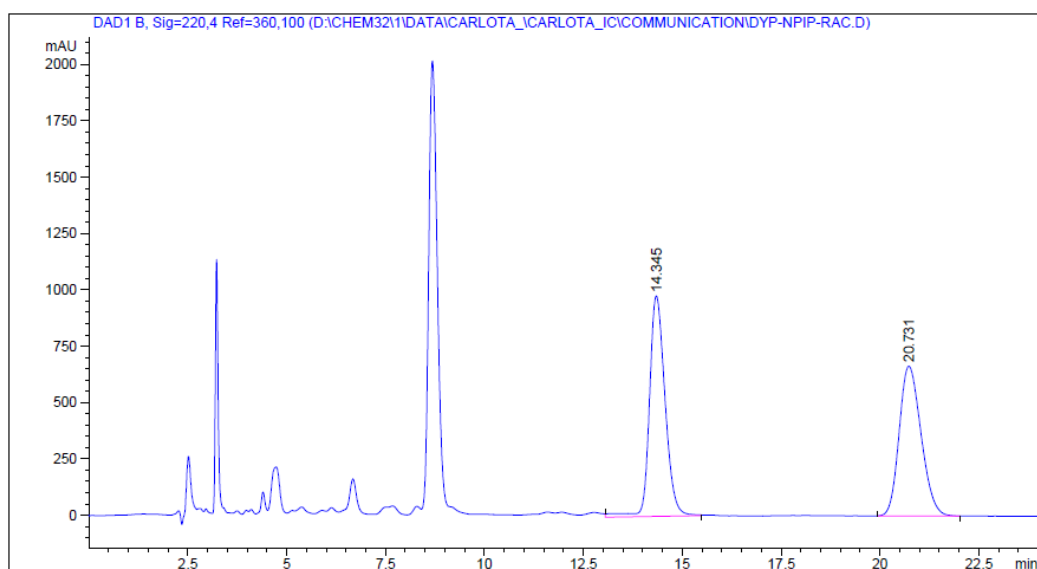

| Peak # | RetTime [min] | Sig | Type | Area [mAU*s] | Height [mAU] | Area %  |
|--------|---------------|-----|------|--------------|--------------|---------|
| 1      | 14.345        | 1   | VB   | 2.69810e4    | 977.88995    | 51.3664 |
| 2      | 20.731        | 1   | BB   | 2.55455e4    | 664.34735    | 48.6336 |

Table 2 entry 5

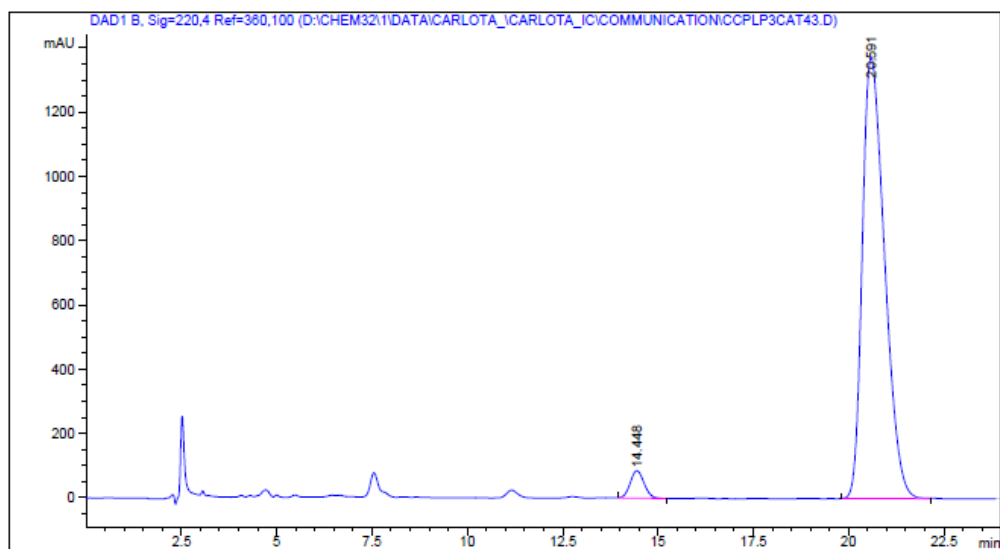

| Peak # | RetTime [min] | Sig | Type | Area [mAU*s] | Height [mAU] | Area %  |
|--------|---------------|-----|------|--------------|--------------|---------|
| 1      | 14.448        | 1   | BB   | 2165.39771   | 85.76028     | 3.7432  |
| 2      | 20.591        | 1   | BB   | 5.56833e4    | 1372.46448   | 96.2568 |

HPLC analysis: Chiralpack IC, *n*-Hex:*i*PrOH = 70/30, 25°C, flow rate = 1.5 mL/min,  $\lambda$  = 220 nm,  $t_R$ (epoxide 1) = 12.6 min,  $t_R$ (epoxide 2) = 15.3 min

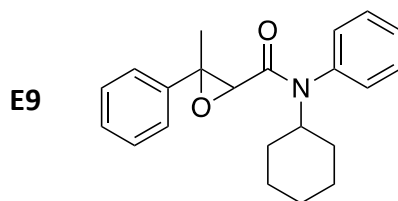

Racemic

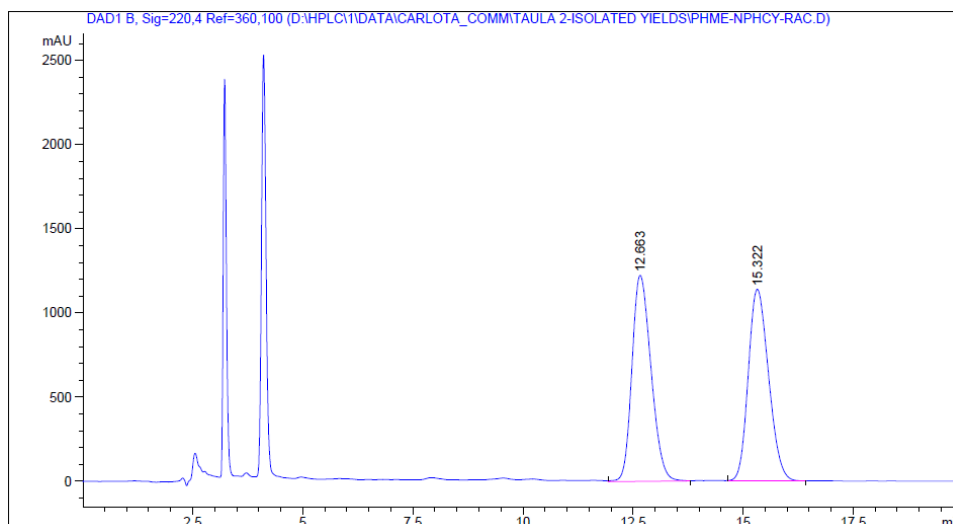

| Peak # | RetTime [min] | Sig | Type | Area [mAU*s] | Height [mAU] | Area %  |
|--------|---------------|-----|------|--------------|--------------|---------|
| 1      | 12.663        | 1   | VV   | 3.68422e4    | 1223.34424   | 50.2886 |
| 2      | 15.322        | 1   | BV   | 3.64194e4    | 1137.42798   | 49.7114 |

Table 2 entry 7

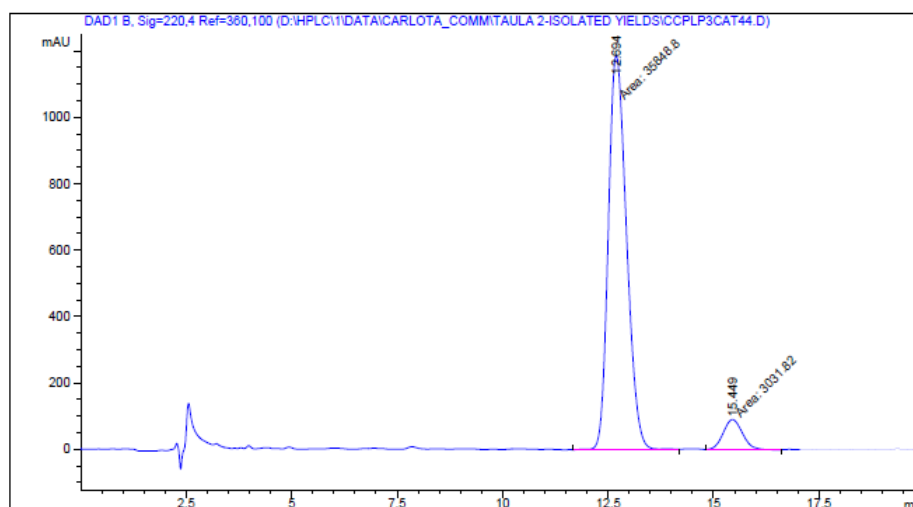

| Peak # | RetTime [min] | Sig | Type | Area [mAU*s] | Height [mAU] | Area %  |
|--------|---------------|-----|------|--------------|--------------|---------|
| 1      | 12.694        | 1   | MF   | 3.58488e4    | 1189.14258   | 92.2022 |
| 2      | 15.449        | 1   | FM   | 3031.81714   | 92.51637     | 7.7978  |

HPLC analysis: Chiralpack IC, *n*-Hex:*i*PrOH = 80/20, 25°C, flow rate = 1 mL/min,  $\lambda$  = 220 nm,  $t_R$ (epoxide 1) = 7.9 min,  $t_R$ (epoxide 2) = 16.6 min

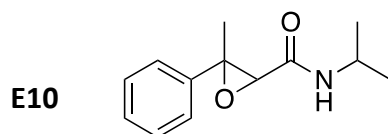

Racemic

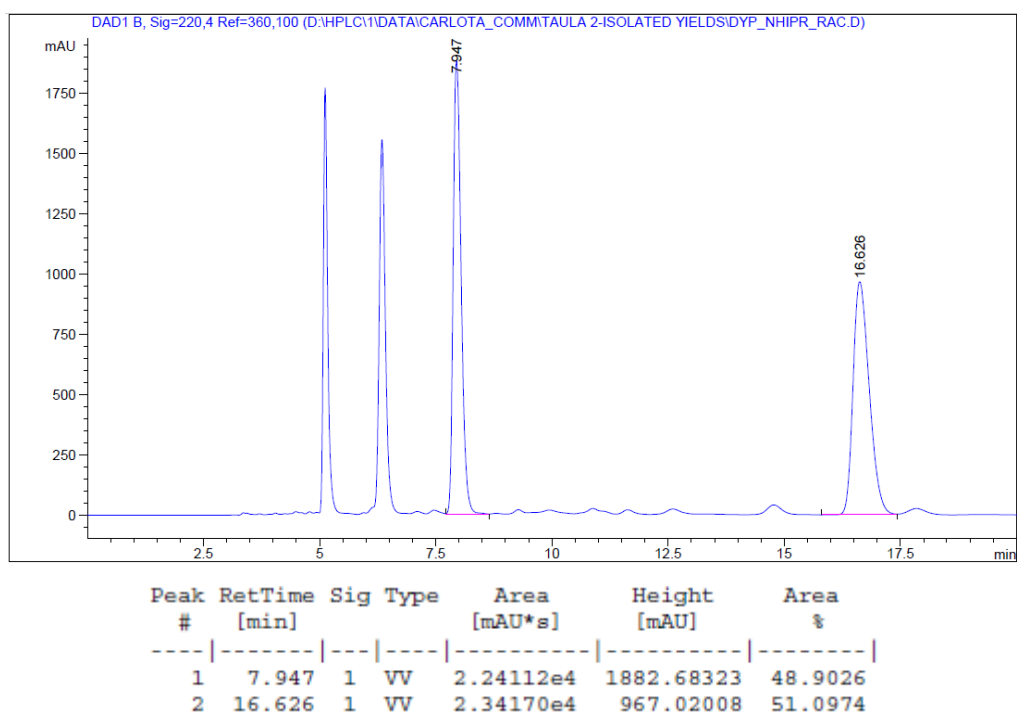

Table 2 entry 8

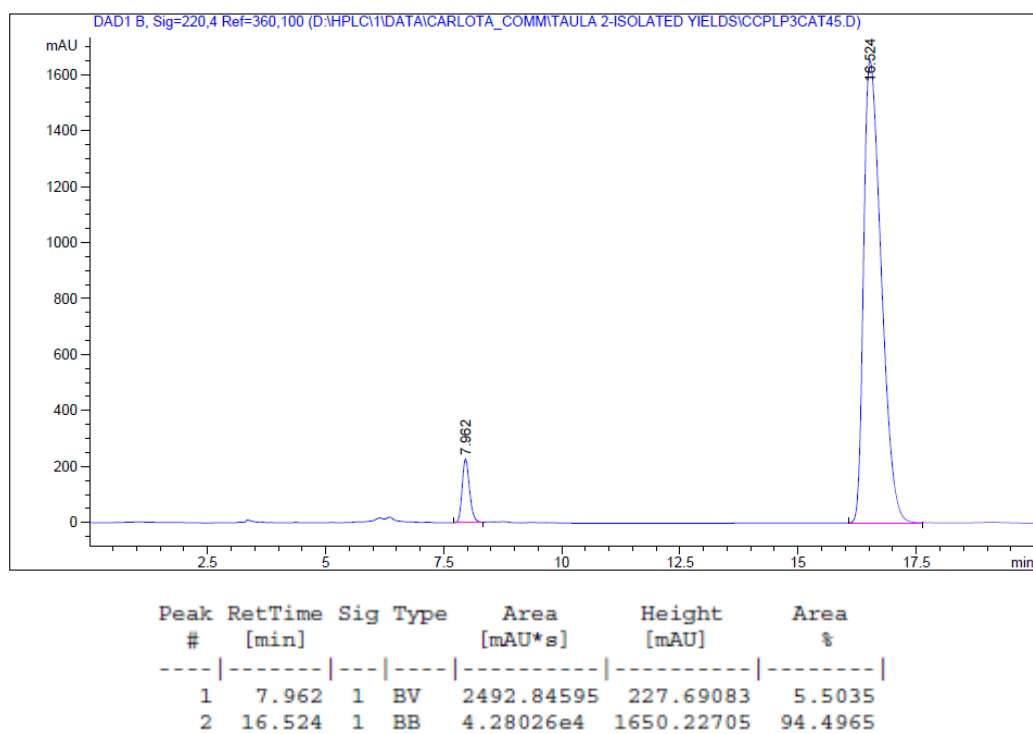

HPLC analysis: Chiralpack IC, *n*-Hex:*i*PrOH = 80/20, 25°C, flow rate = 1.5 mL/min,  $\lambda$  = 220 nm,  $t_R$ (epoxide 1) = 7.3 min,  $t_R$ (epoxide 2) = 14.0 min

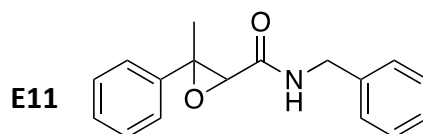

Racemic

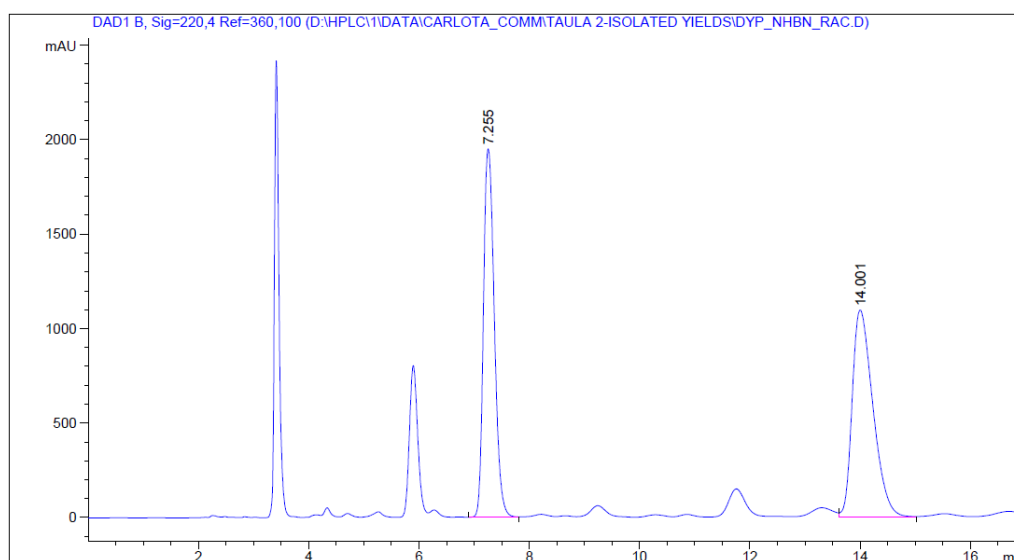

| Peak # | RetTime [min] | Sig | Type | Area [mAU*s] | Height [mAU] | Area %  |
|--------|---------------|-----|------|--------------|--------------|---------|
| 1      | 7.255         | 1   | VV   | 2.66704e4    | 1950.68091   | 48.3623 |
| 2      | 14.001        | 1   | VB   | 2.84767e4    | 1093.61707   | 51.6377 |

Table 2 entry 9

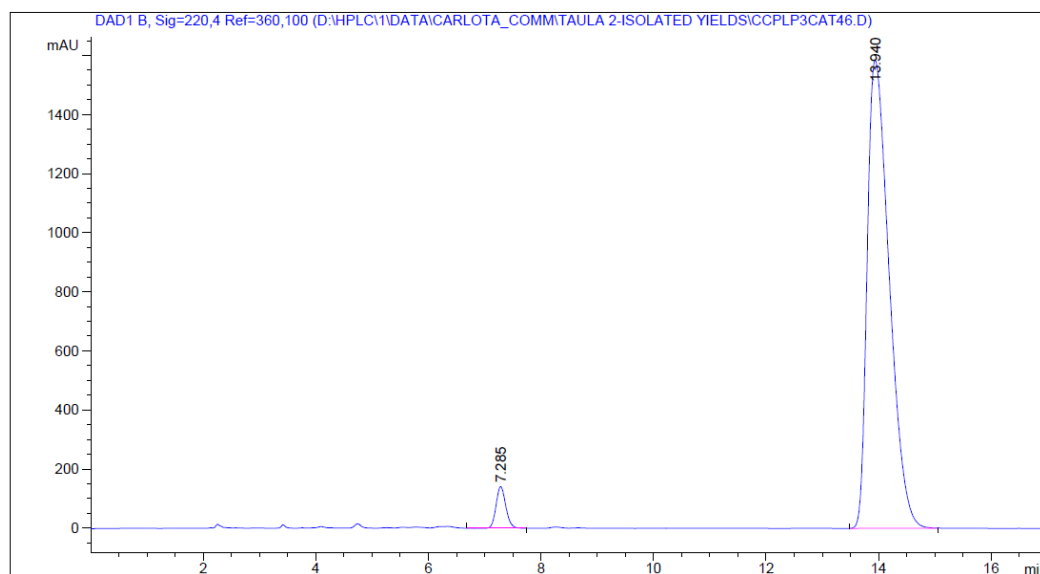

| Peak # | RetTime [min] | Sig | Type | Area [mAU*s] | Height [mAU] | Area %  |
|--------|---------------|-----|------|--------------|--------------|---------|
| 1      | 7.285         | 1   | VB   | 1693.10364   | 141.02760    | 3.7981  |
| 2      | 13.940        | 1   | BB   | 4.28841e4    | 1584.41846   | 96.2019 |

HPLC analysis: Chiralpack IC, *n*-Hex:*i*PrOH = 70/30, 25°C, flow rate = 1 mL/min,  $\lambda$  = 254 nm,  $t_R$ (epoxide 1) = 6.0 min,  $t_R$ (epoxide 2) = 7.3 min

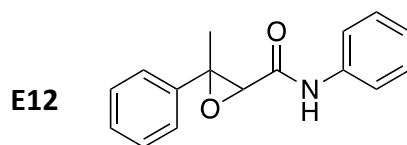

Racemic

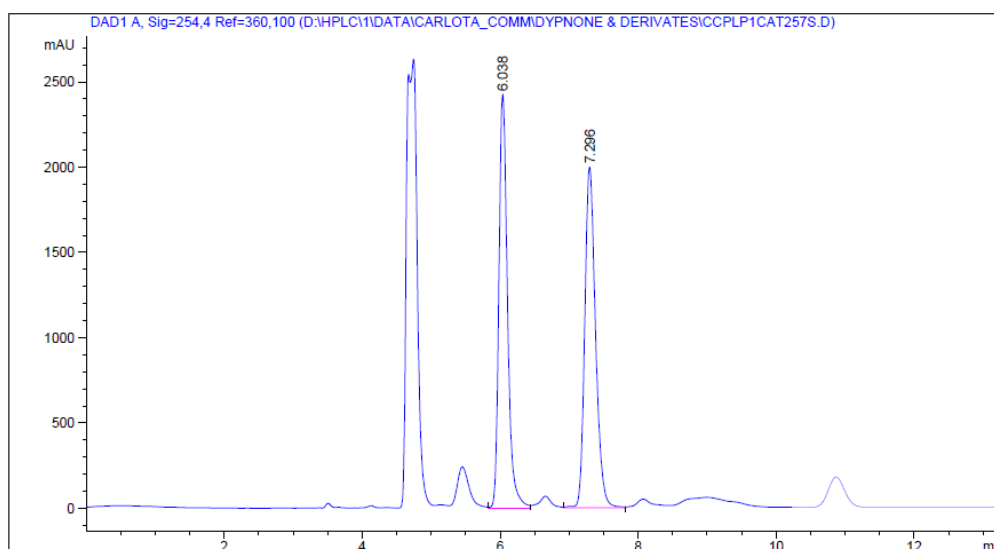

Table 2 entry 10

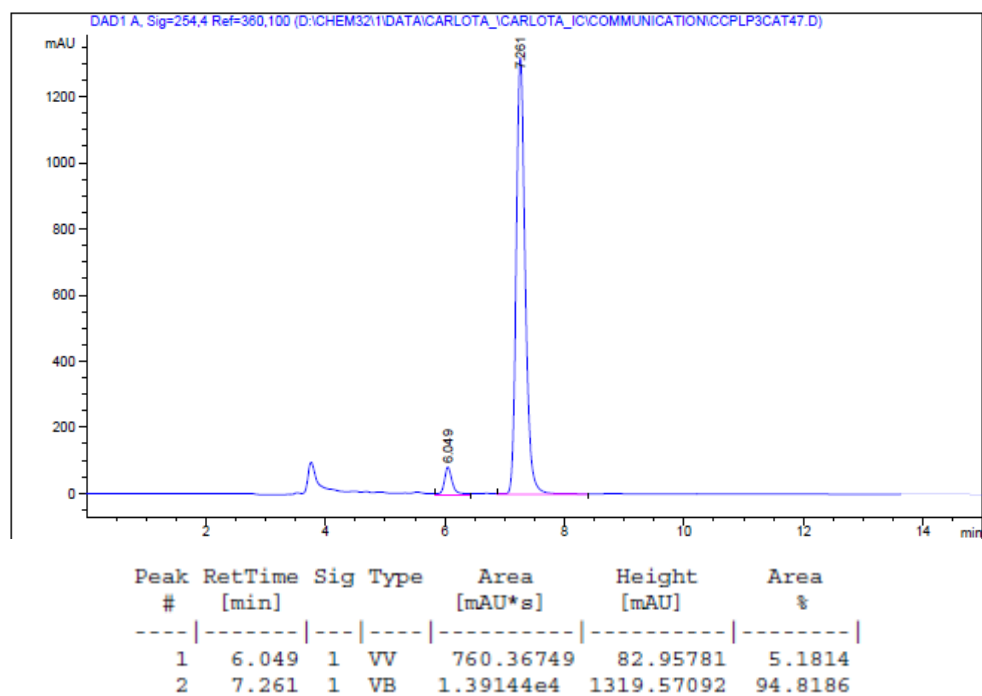

HPLC analysis: Chiralpack IC, *n*-Hex:*i*PrOH = 80/20, 25°C, flow rate = 1.5 mL/min,  $\lambda$  = 220 nm,  $t_R$ (epoxide 1) = 4.9 min,  $t_R$ (epoxide 2) = 11.6 min

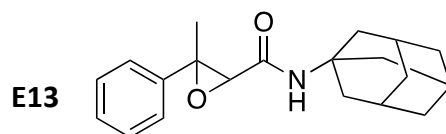

Racemic

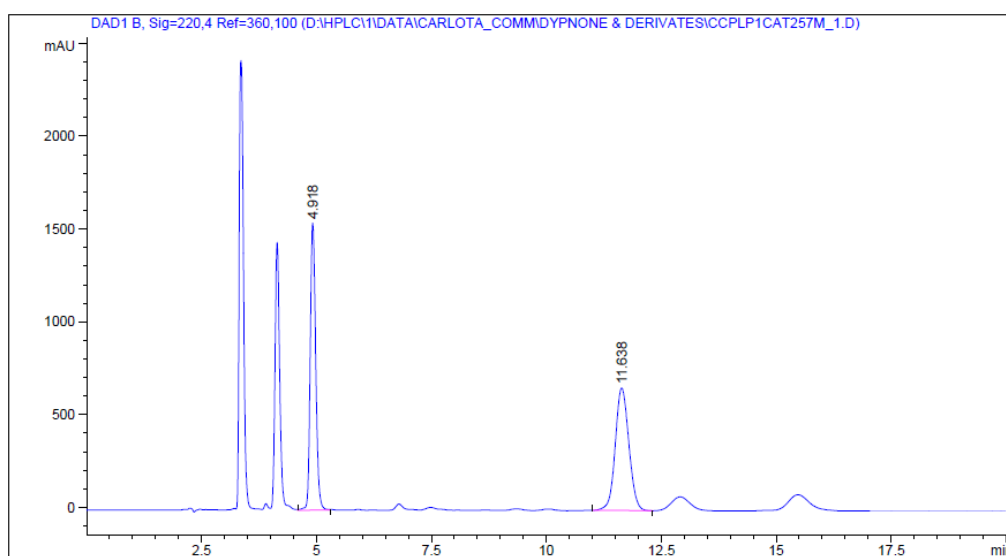

Table 2 entry 11

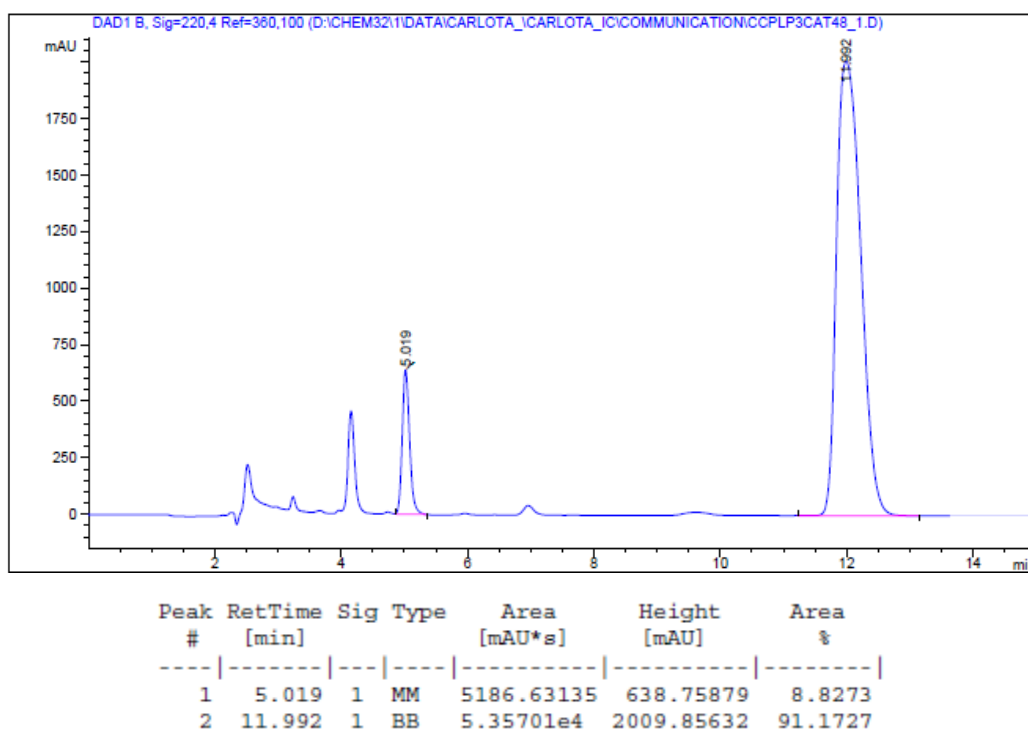

HPLC analysis: Chiralpack IC, *n*-Hex:*i*PrOH = 80/20, 25°C, flow rate = 1.5 mL/min,  $\lambda$  = 220 nm,  $t_R$ (epoxide 1) = 15.9 min,  $t_R$ (epoxide 2) = 21.8 min

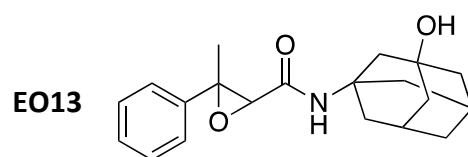

Racemic

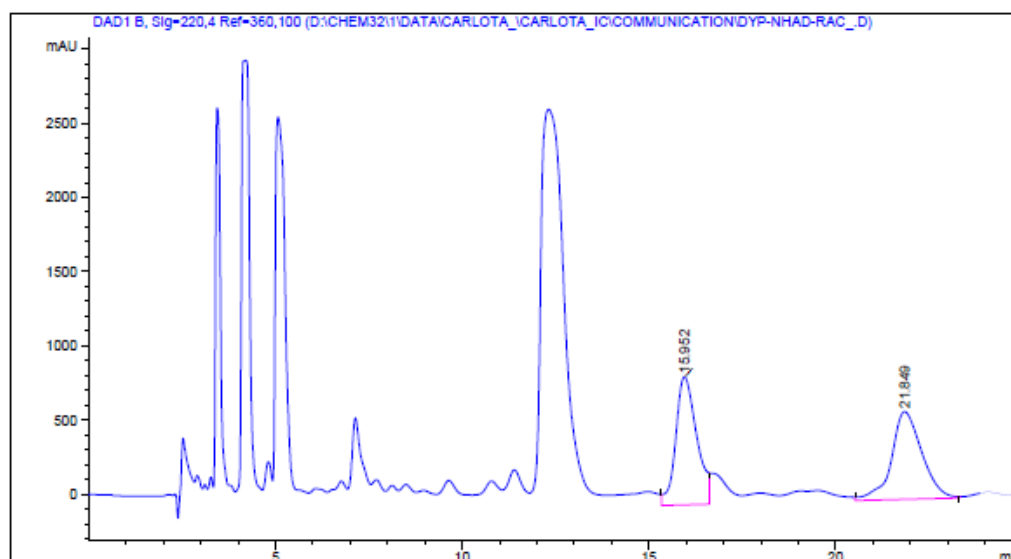

| Peak # | RetTime [min] | Sig | Type | Area [mAU*s] | Height [mAU] | Area %  |
|--------|---------------|-----|------|--------------|--------------|---------|
| 1      | 15.952        | 1   | MF   | 3.38154e4    | 864.04572    | 50.2509 |
| 2      | 21.849        | 1   | VV   | 3.34778e4    | 590.49371    | 49.7491 |

Table 2 entry 11

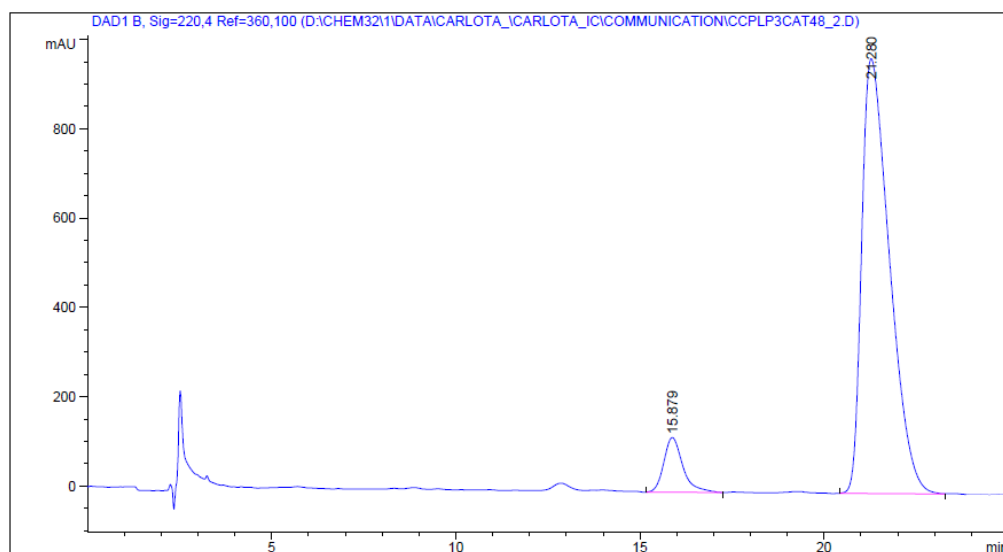

| Peak # | RetTime [min] | Sig | Type | Area [mAU*s] | Height [mAU] | Area %  |
|--------|---------------|-----|------|--------------|--------------|---------|
| 1      | 15.879        | 1   | BB   | 4388.79004   | 122.38078    | 7.9041  |
| 2      | 21.280        | 1   | BB   | 5.11366e4    | 974.14526    | 92.0959 |

HPLC analysis: Chiralpack IC, *n*-Hex:*i*PrOH = 80/20, 25°C, flow rate = 1.5 mL/min,  $\lambda$  = 220 nm,  $t_R$ (epoxide 1) = 11.7 min,  $t_R$ (epoxide 2) = 16.2 min

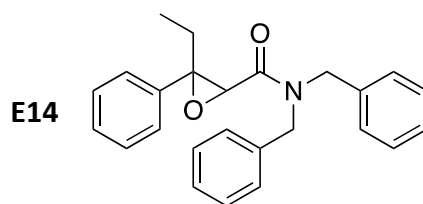

Racemic

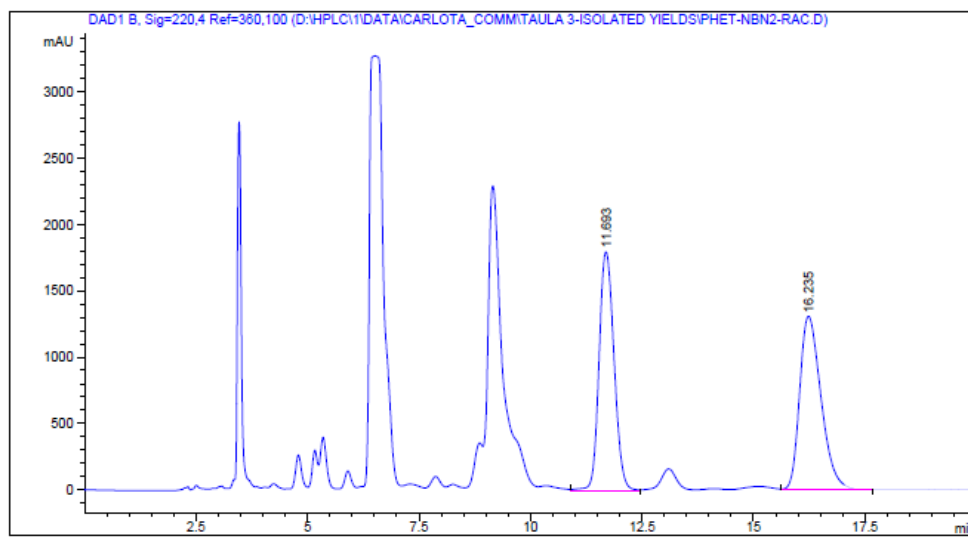

| Peak # | RetTime [min] | Sig | Type | Area [mAU*s] | Height [mAU] | Area %  |
|--------|---------------|-----|------|--------------|--------------|---------|
| 1      | 11.693        | 1   | VV   | 4.19461e4    | 1797.18799   | 48.8658 |
| 2      | 16.235        | 1   | VB   | 4.38932e4    | 1311.67285   | 51.1342 |

Table 3 entry 1

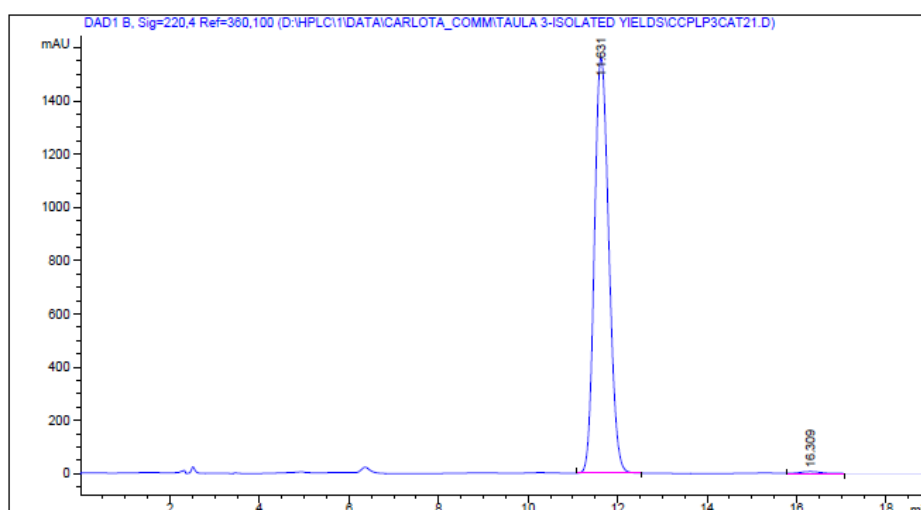

| Peak # | RetTime [min] | Sig | Type | Area [mAU*s] | Height [mAU] | Area %  |
|--------|---------------|-----|------|--------------|--------------|---------|
| 1      | 11.631        | 1   | BB   | 3.49396e4    | 1562.86584   | 99.4574 |
| 2      | 16.309        | 1   | BB   | 190.62032    | 6.33166      | 0.5426  |

HPLC analysis: Chiralpack IA, *n*-Hex:*i*PrOH = 90/10, 25°C, flow rate = 1.5 mL/min,  $\lambda$  = 220 nm,  $t_R$ (epoxide 1) = 25.3 min,  $t_R$ (epoxide 2) = 26.9 min

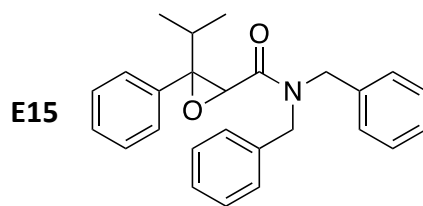

Racemic

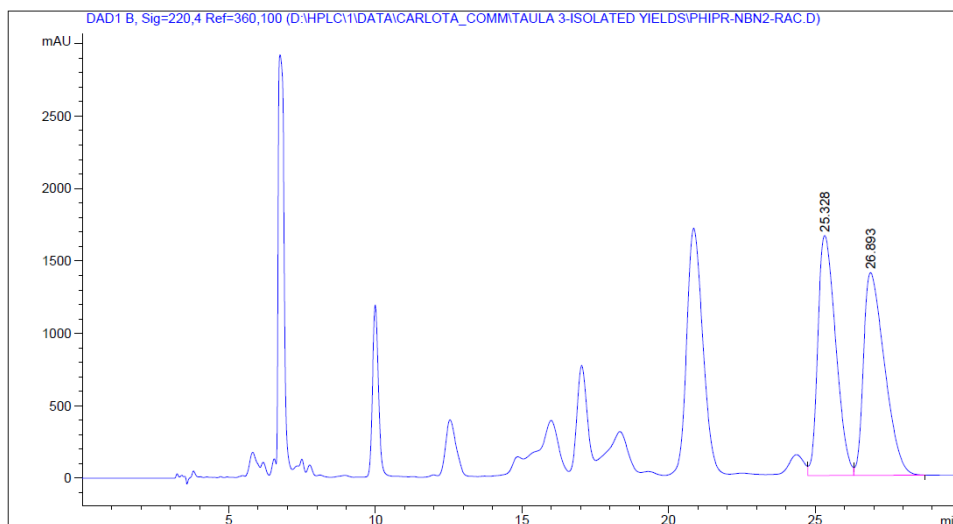

| Peak # | RetTime [min] | Sig | Type | Area [mAU*s] | Height [mAU] | Area %  |
|--------|---------------|-----|------|--------------|--------------|---------|
| 1      | 25.328        | 1   | VV   | 7.00775e4    | 1655.96509   | 50.0621 |
| 2      | 26.893        | 1   | VB   | 6.99036e4    | 1398.50403   | 49.9379 |

Table 3 entry 2

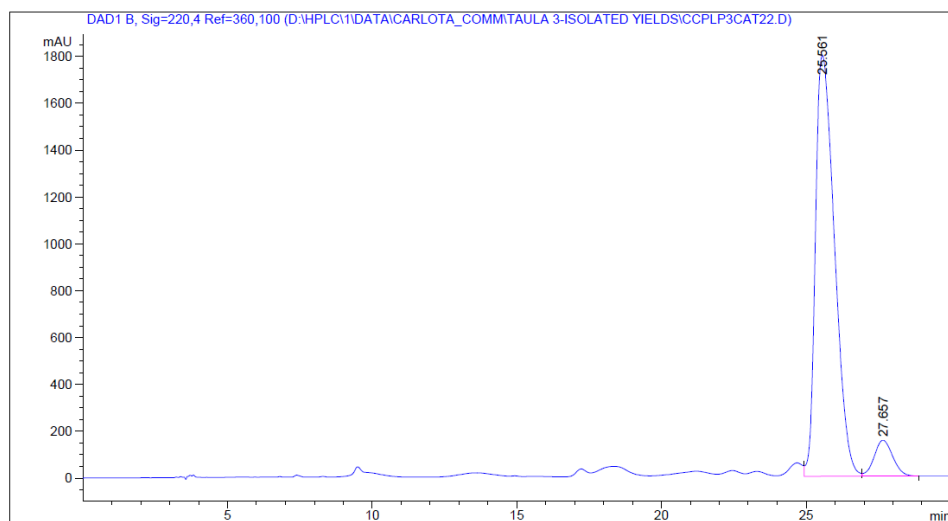

| Peak # | RetTime [min] | Sig | Type | Area [mAU*s] | Height [mAU] | Area %  |
|--------|---------------|-----|------|--------------|--------------|---------|
| 1      | 25.561        | 1   | VV   | 8.22709e4    | 1797.31079   | 92.2980 |
| 2      | 27.657        | 1   | VB   | 6865.26611   | 153.87462    | 7.7020  |

HPLC analysis: Chiralpack IC, *n*-Hex:*i*PrOH = 70/30, 25°C, flow rate = 1.5 mL/min,  $\lambda$  = 220 nm,  $t_R$ (epoxide 1) = 18.5 min,  $t_R$ (epoxide 2) = 21.3 min

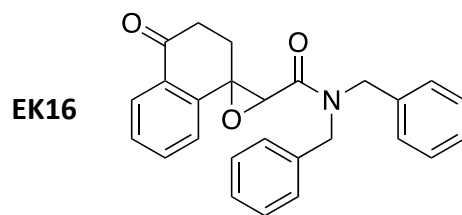

Racemic

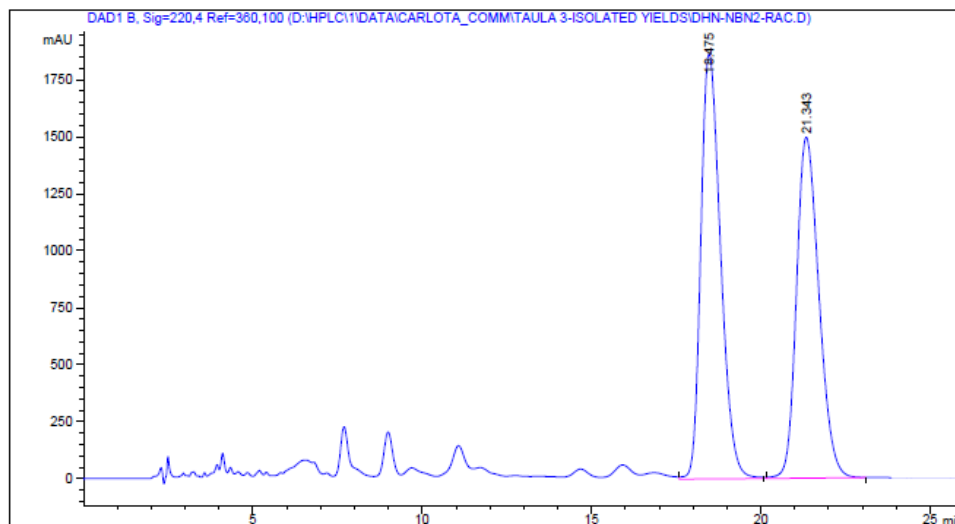

| Peak # | RetTime [min] | Sig | Type | Area [mAU*s] | Height [mAU] | Area %  |
|--------|---------------|-----|------|--------------|--------------|---------|
| 1      | 18.475        | 1   | VB   | 7.55551e4    | 1866.57214   | 52.3135 |
| 2      | 21.343        | 1   | BB   | 6.88725e4    | 1496.13428   | 47.6865 |

Table 3 entry 3

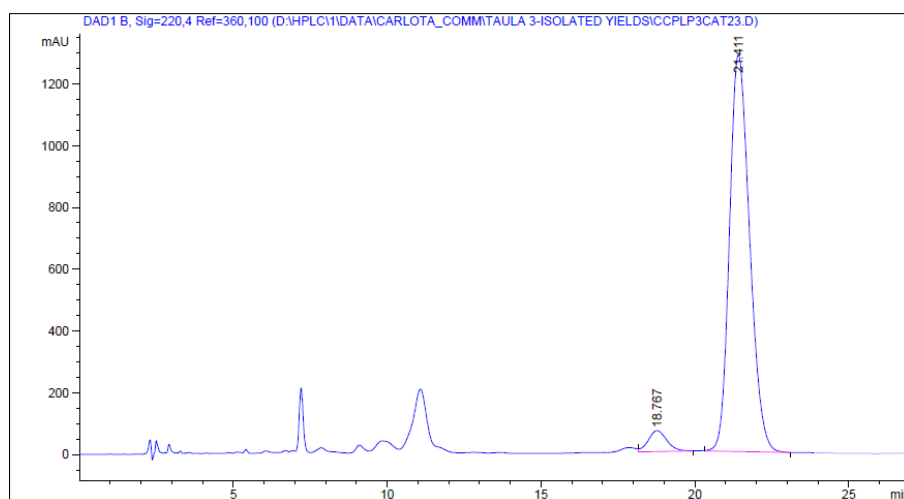

| Peak # | RetTime [min] | Sig | Type | Area [mAU*s] | Height [mAU] | Area %  |
|--------|---------------|-----|------|--------------|--------------|---------|
| 1      | 18.767        | 1   | VB   | 2842.10303   | 67.73098     | 4.6414  |
| 2      | 21.411        | 1   | BB   | 5.83923e4    | 1283.93262   | 95.3586 |

HPLC analysis: Chiralpack IC, *n*-Hex:*i*PrOH = 80/20, 25°C, flow rate = 1.5 mL/min,  $\lambda$  = 220 nm,  $t_R$ (epoxide 1) = 15.1 min,  $t_R$ (epoxide 2) = 18.8 min

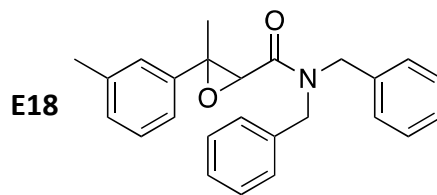

Racemic

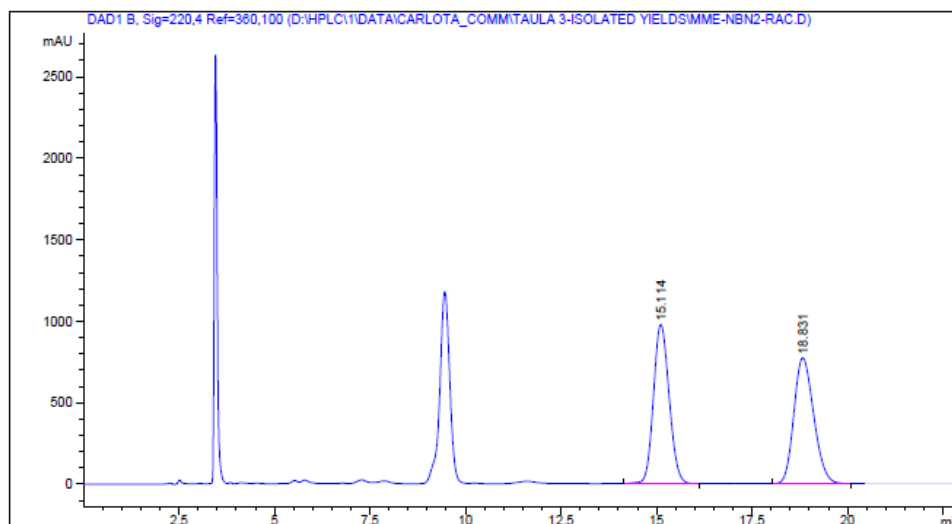

| Peak # | RetTime [min] | Sig | Type | Area [mAU*s] | Height [mAU] | Area %  |
|--------|---------------|-----|------|--------------|--------------|---------|
| 1      | 15.114        | 1   | BB   | 2.78229e4    | 976.66205    | 50.0215 |
| 2      | 18.831        | 1   | VB   | 2.77990e4    | 771.61194    | 49.9785 |

Table 3 entry 5

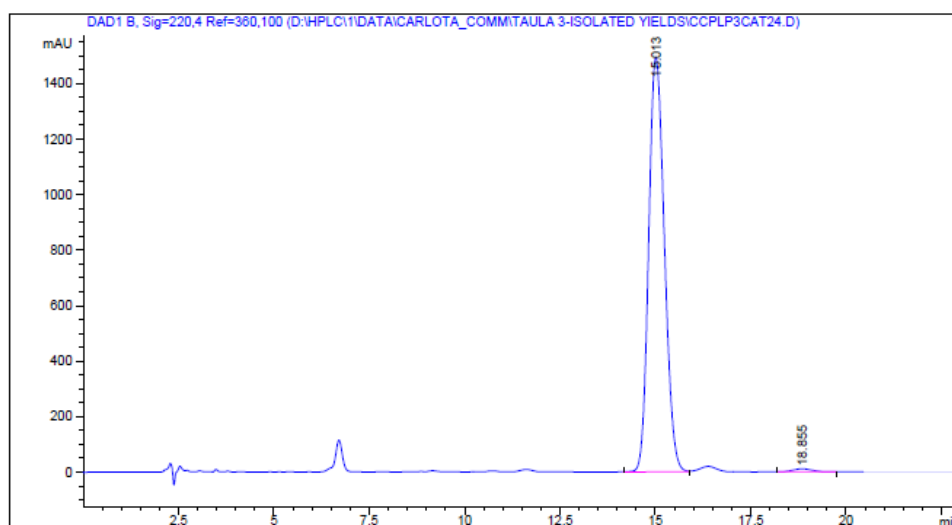

| Peak # | RetTime [min] | Sig | Type | Area [mAU*s] | Height [mAU] | Area %  |
|--------|---------------|-----|------|--------------|--------------|---------|
| 1      | 15.013        | 1   | BV   | 4.28163e4    | 1493.05298   | 99.2228 |
| 2      | 18.855        | 1   | BB   | 335.36014    | 10.41287     | 0.7772  |

## UV-VIS spectra of the enantiomers

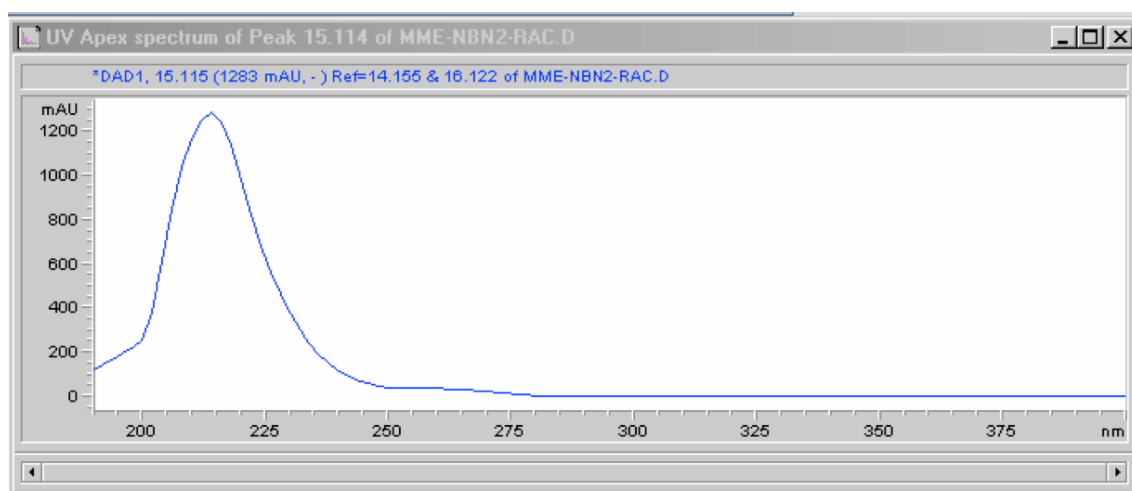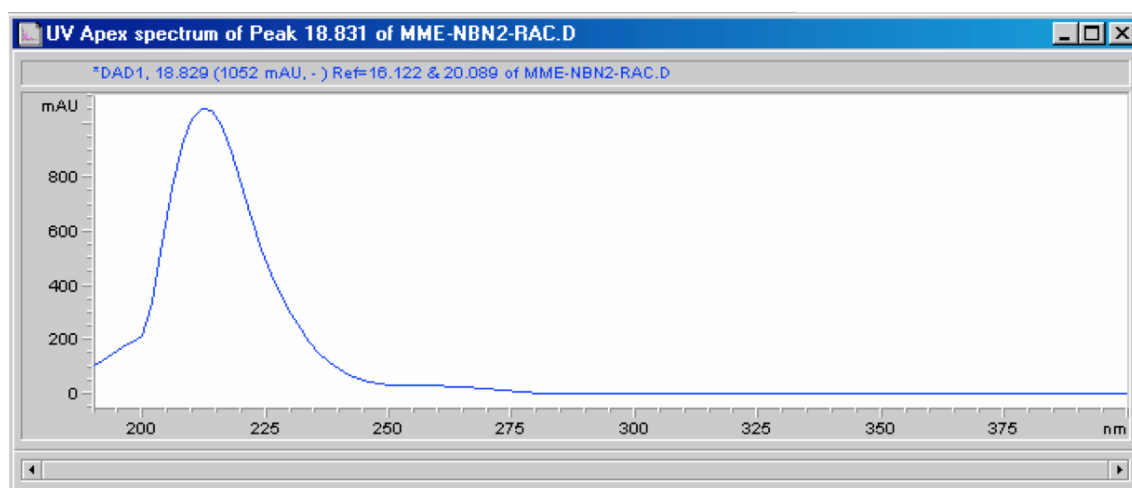

HPLC analysis: Chiralpack IC, *n*-Hex:*i*PrOH = 80/20, 25°C, flow rate = 1.5 mL/min,  $\lambda$  = 220 nm,  $t_R$ (epoxide 1) = 7.4 min,  $t_R$ (epoxide 2) = 10.6 min

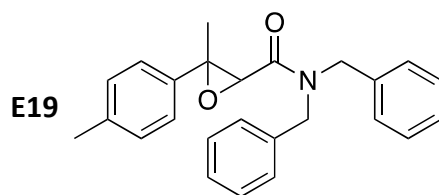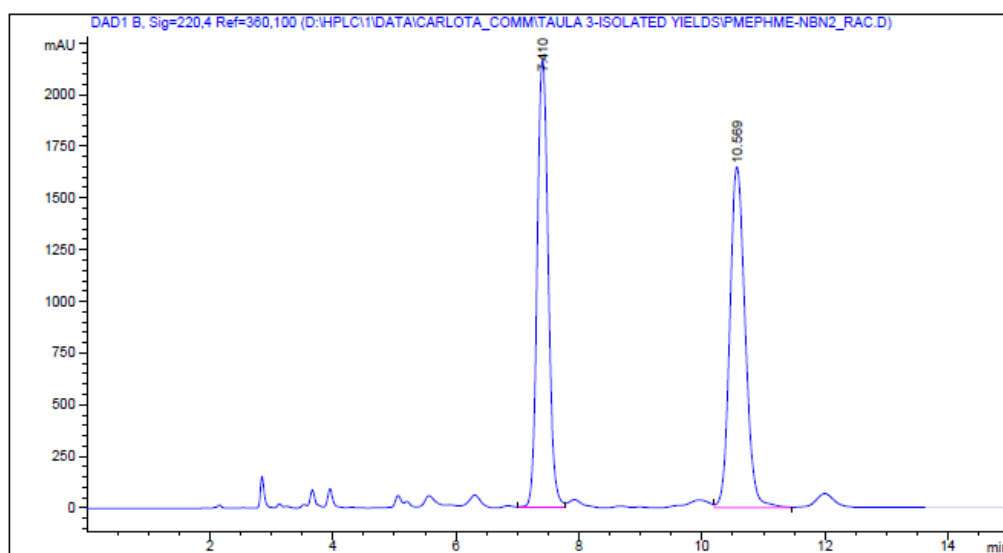

Table 3 entry 6

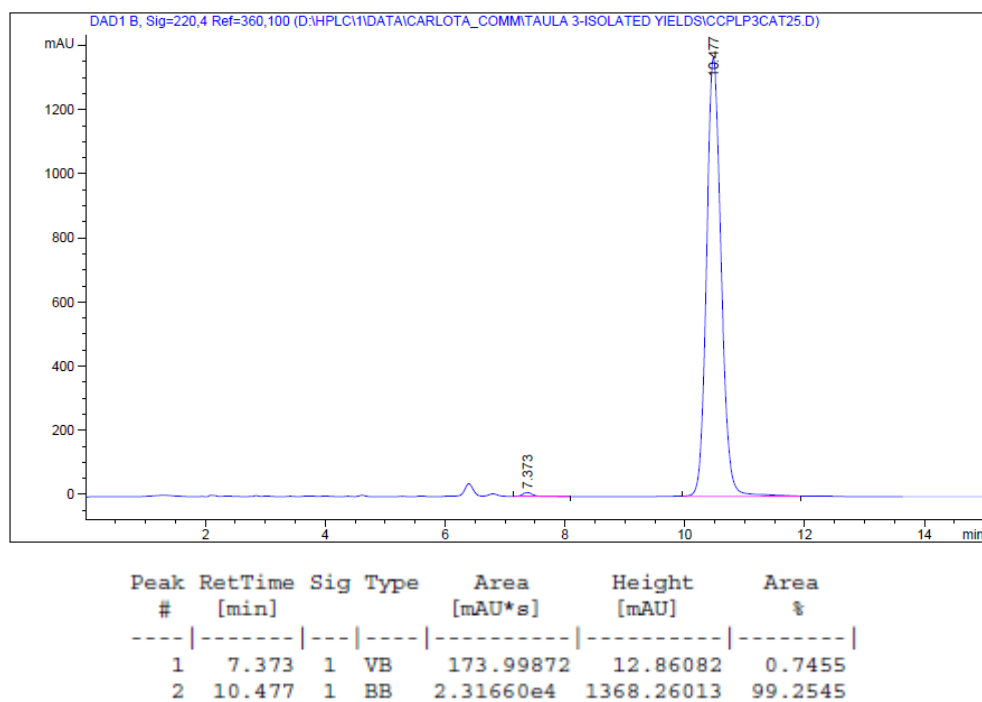

HPLC analysis: Chiralpack IC, *n*-Hex:*i*PrOH = 90/10, 25°C, flow rate = 1.5 mL/min,  $\lambda$  = 220 nm,  $t_R$ (epoxide 1) = 17.8 min,  $t_R$ (epoxide 2) = 20.9 min

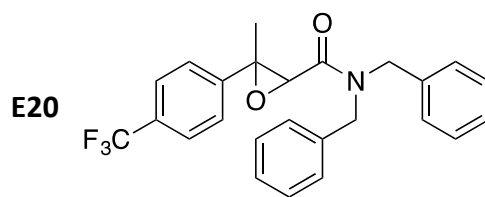

Racemic

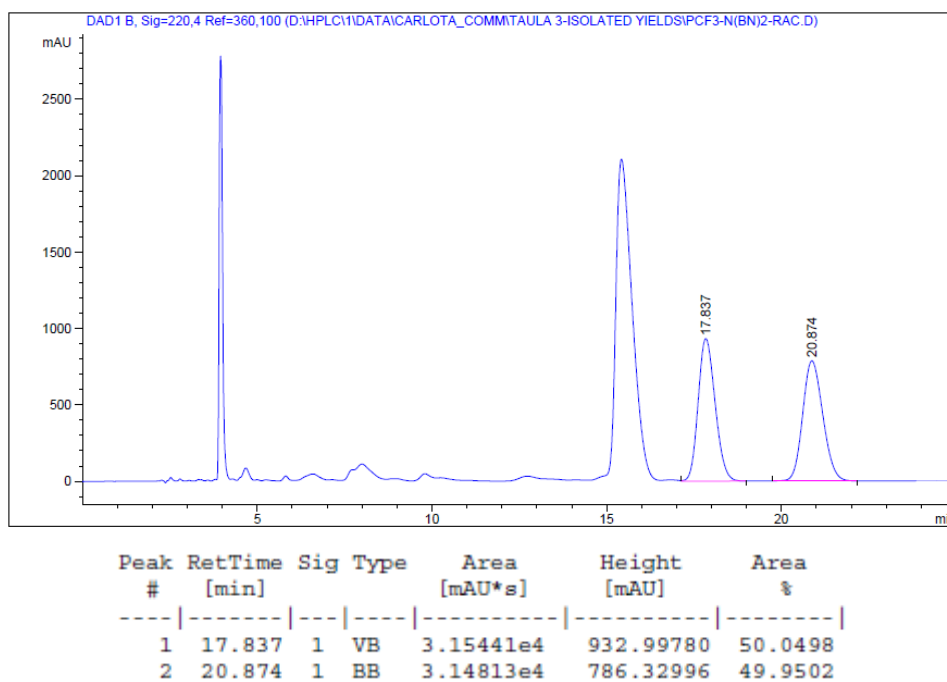

Table 3 entry 7

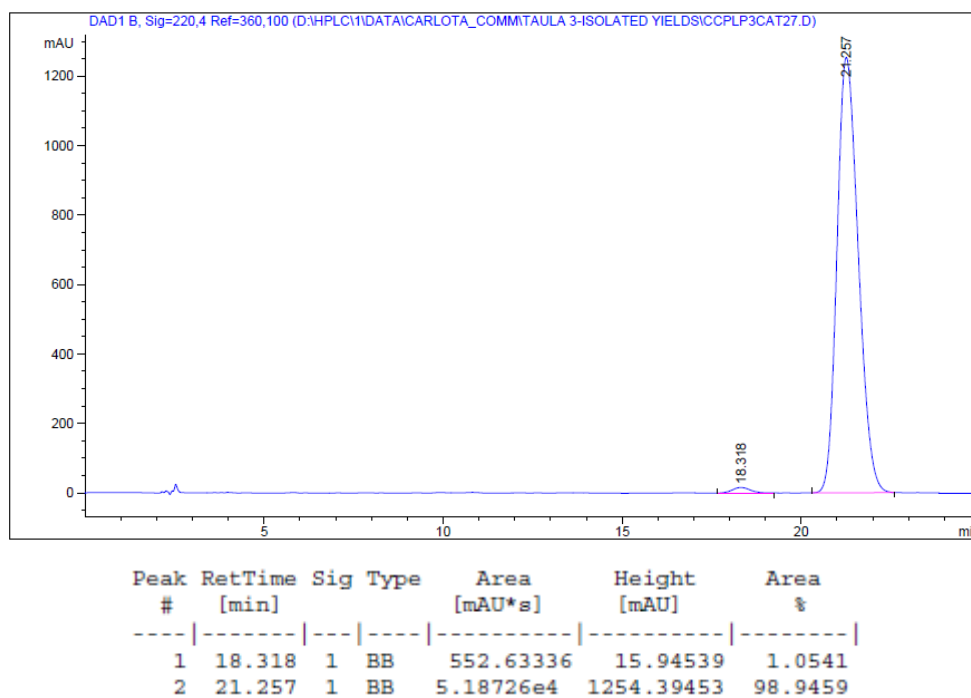

HPLC analysis: Chiralpack IA, *n*-Hex:/iPrOH = 80/20, 25°C, flow rate = 1 mL/min,  $\lambda$  = 220 nm,  $t_R$ (epoxide 1) = 8.4 min,  $t_R$ (epoxide 2) = 13.2 min

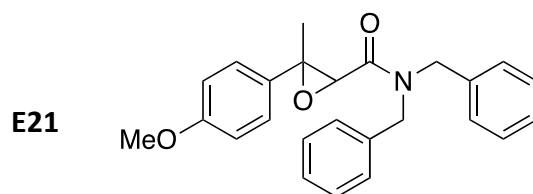

Racemic

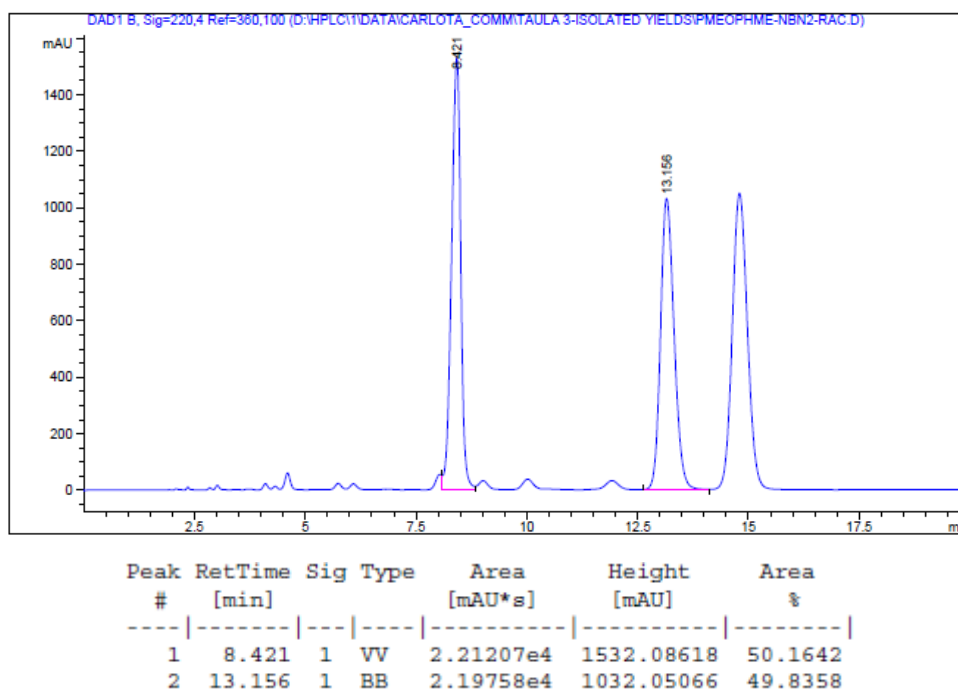

Table 3 entry 8

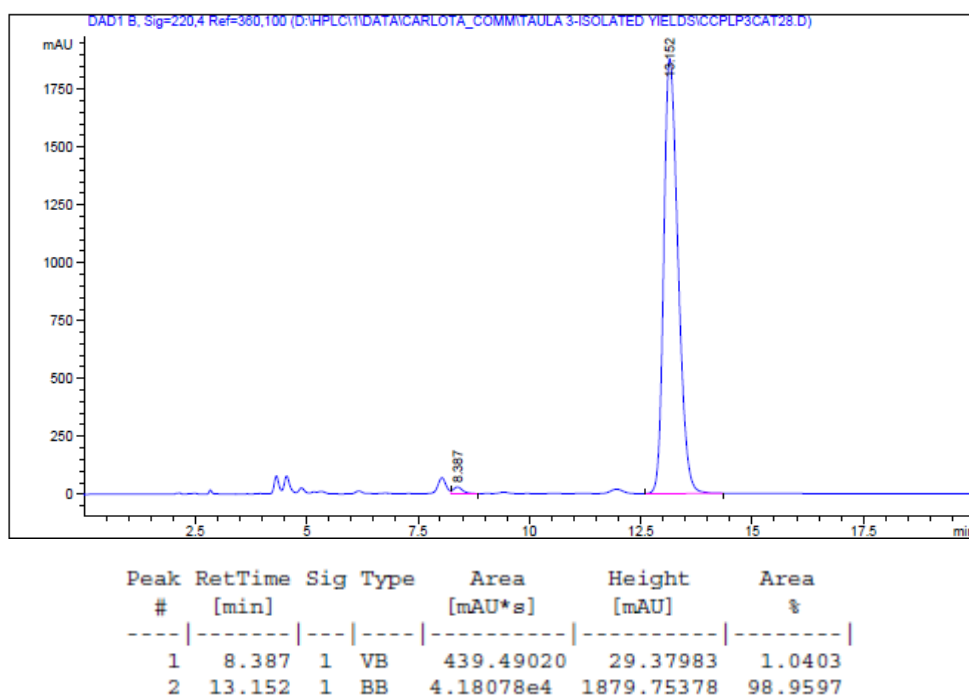

## UV-VIS spectra of the enantiomers

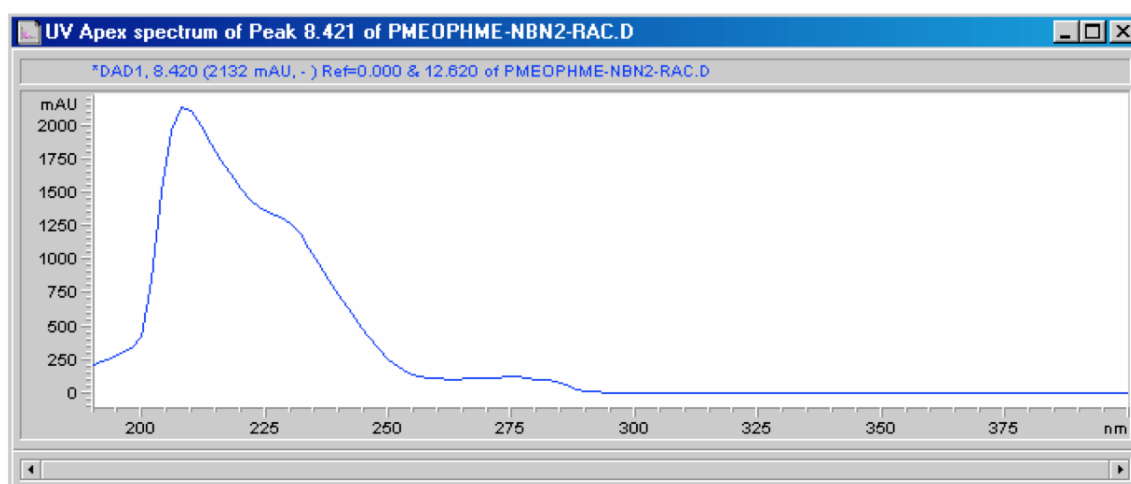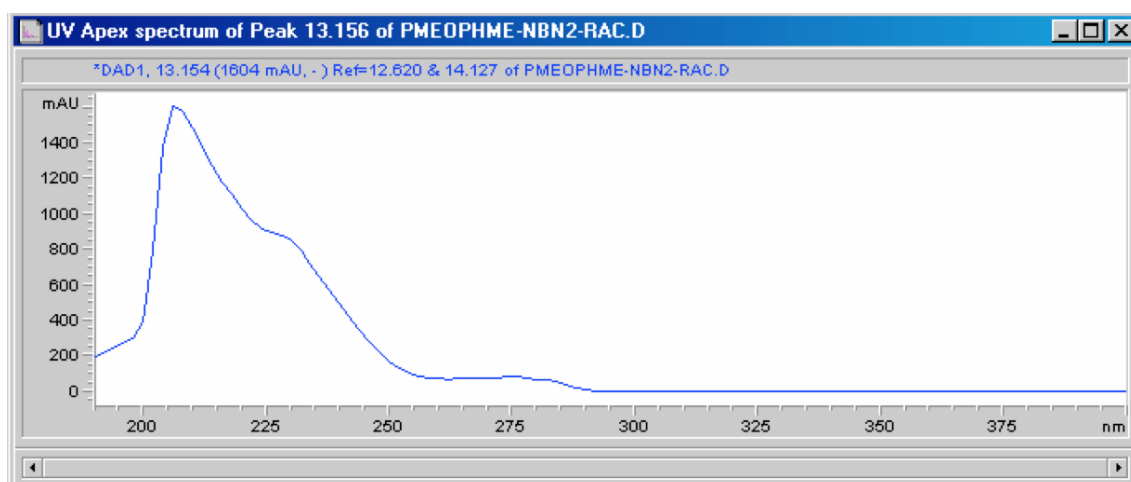

HPLC analysis: Chiralpack IC, *n*-Hex:*i*PrOH = 90/10, 25°C, flow rate = 1.5 mL/min,  $\lambda$  = 220 nm,  $t_R$ (epoxide 1) = 29.2 min,  $t_R$ (epoxide 2) = 31.6 min

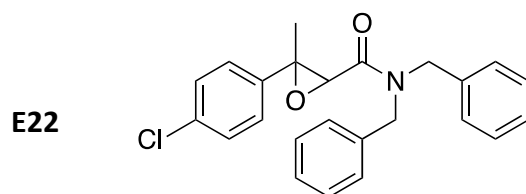

Racemic

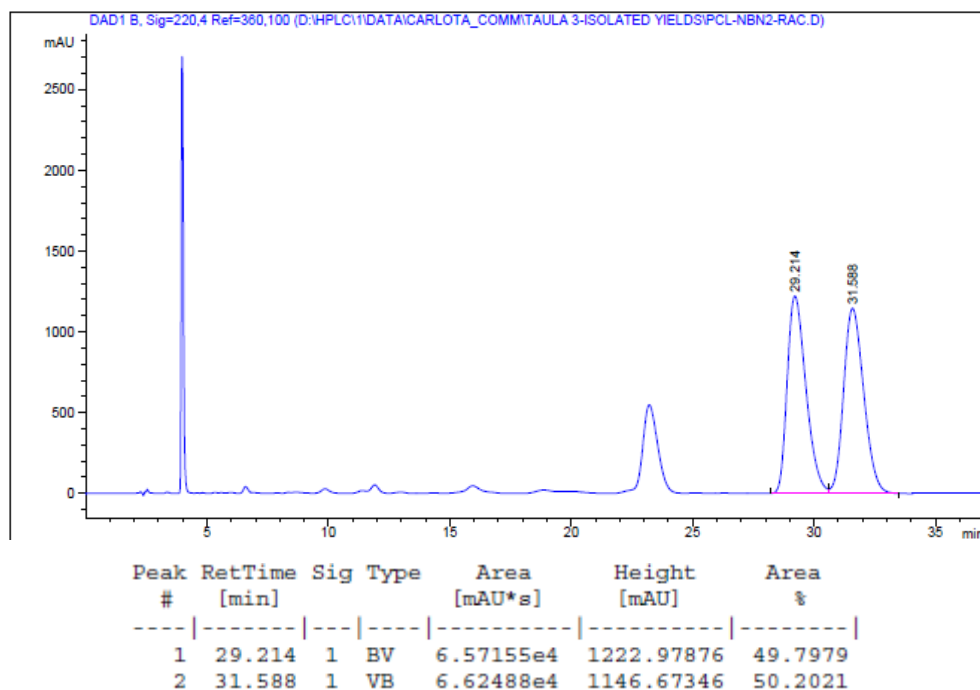

Table 3 entry 9

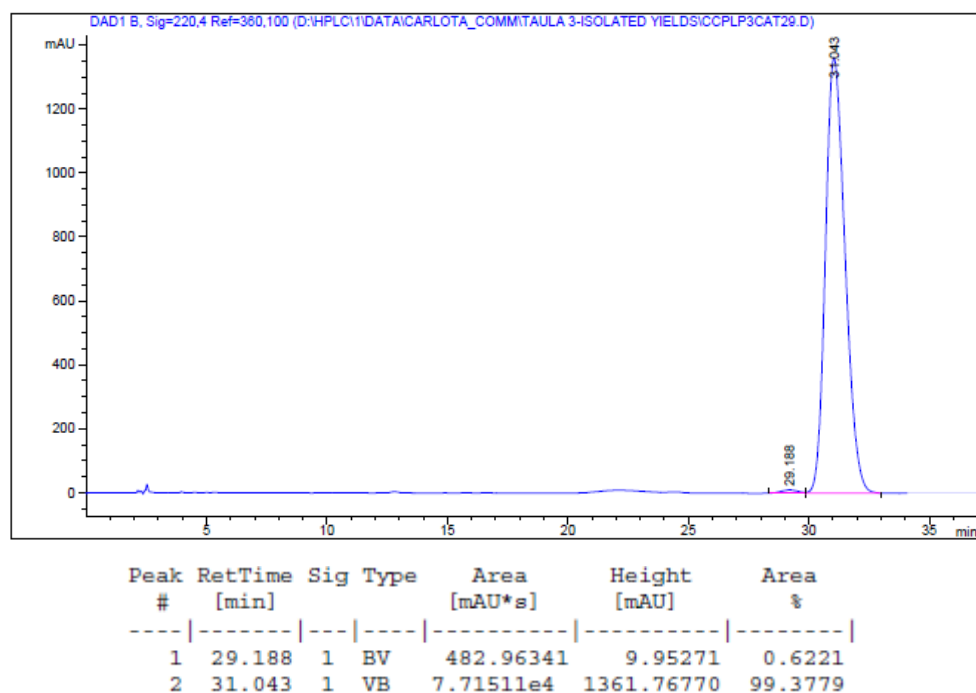

HPLC analysis: Chiralpack IC, *n*-Hex:*i*PrOH = 70/30, 25°C, flow rate = 1.5 mL/min,  $\lambda$  = 220 nm,  $t_R$ (epoxide 1) = 12.2 min,  $t_R$ (epoxide 2) = 14.0 min

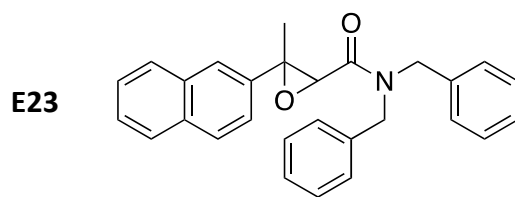

Racemic

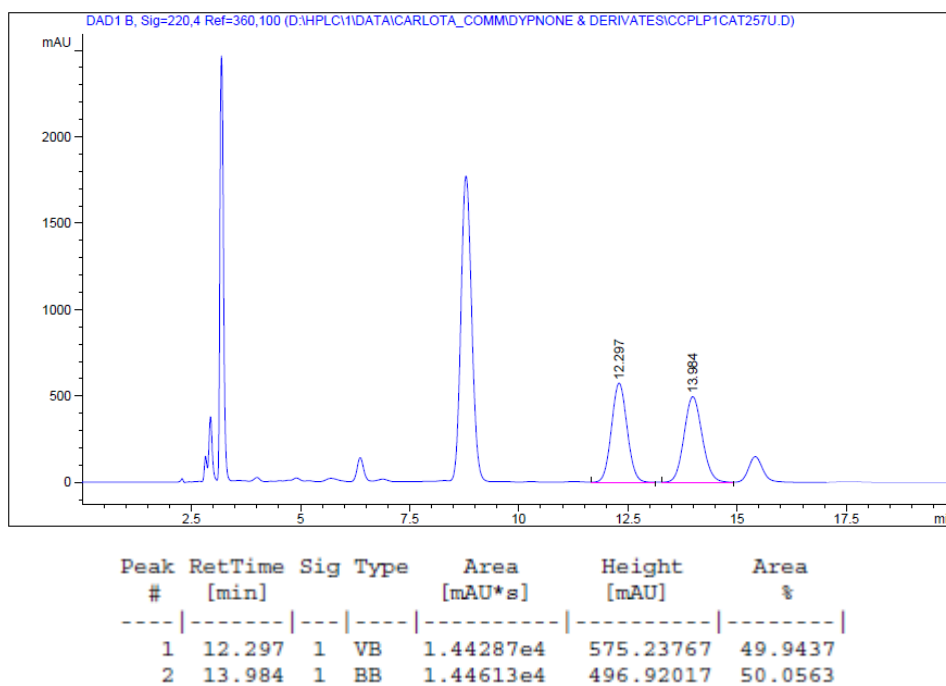

Table 3 entry 10

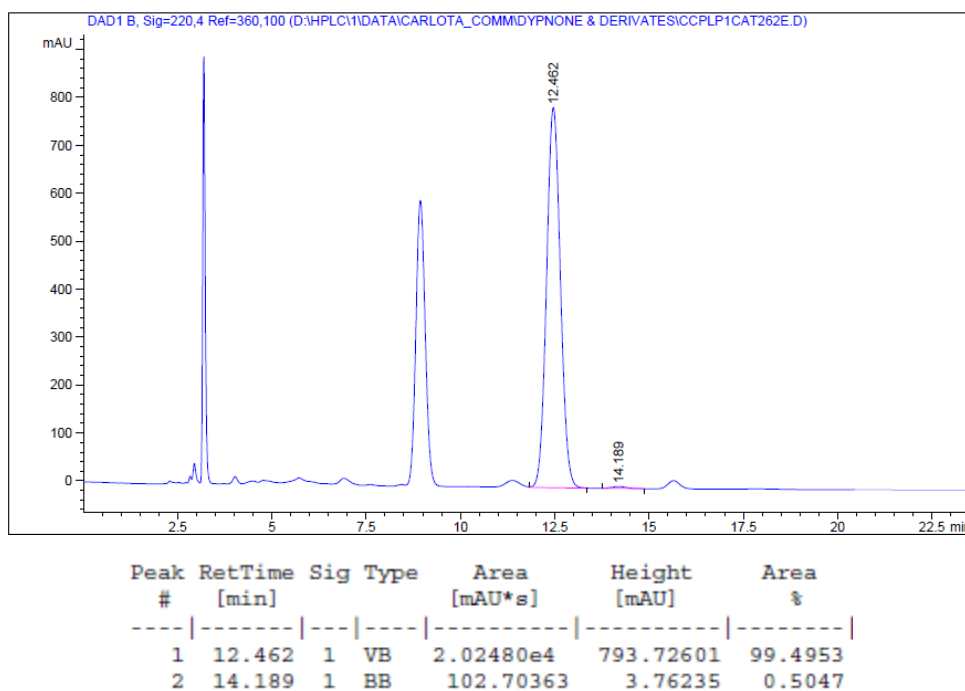

HPLC analysis: Chiralpack IC, *n*-Hex:*i*PrOH = 80/20, 25°C, flow rate = 1.5 mL/min,  $\lambda$  = 220 nm,  $t_R$ (epoxide 1) = 16.6 min,  $t_R$ (epoxide 2) = 18.7 min

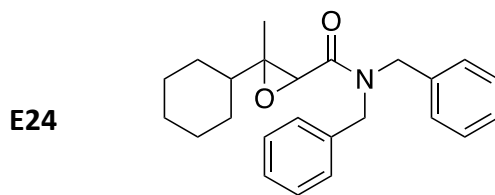

Racemic

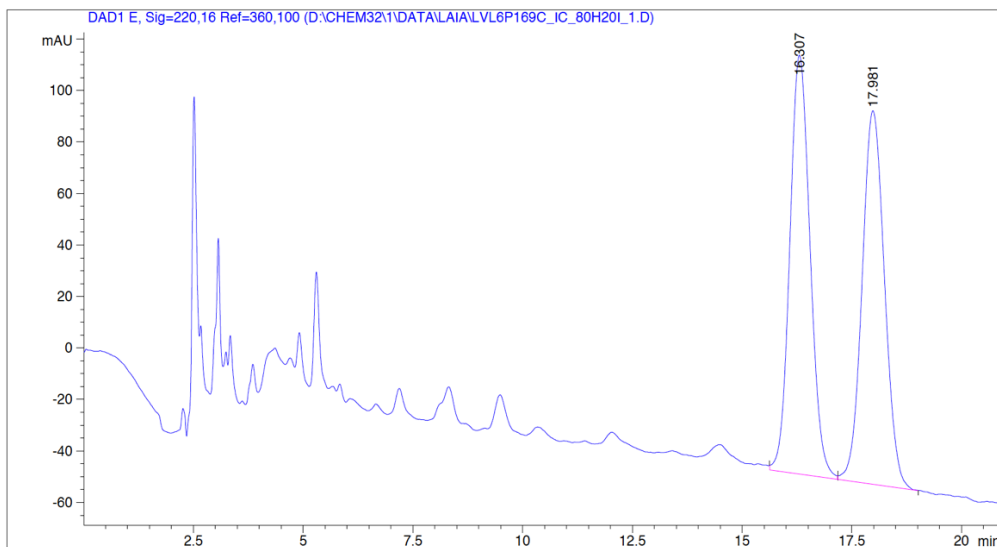

| Peak # | RetTime [min] | Type | Width [min] | Area [mAU*s] | Height [mAU] | Area %  |
|--------|---------------|------|-------------|--------------|--------------|---------|
| 1      | 16.307        | BV   | 0.4999      | 5215.23242   | 162.72824    | 50.3526 |
| 2      | 17.981        | VB   | 0.5394      | 5142.18164   | 145.11638    | 49.6474 |

Table 3 entry 11

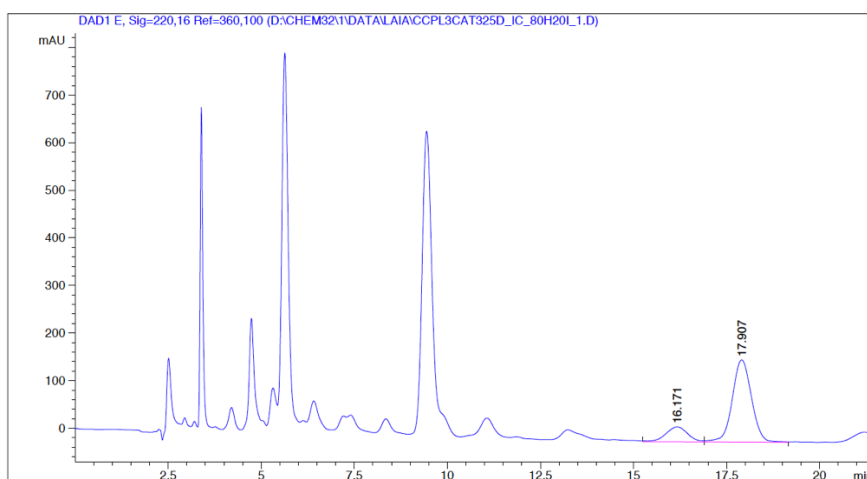

| Peak # | RetTime [min] | Type | Width [min] | Area [mAU*s] | Height [mAU] | Area %  |
|--------|---------------|------|-------------|--------------|--------------|---------|
| 1      | 16.171        | BV   | 0.5517      | 1297.28491   | 31.54834     | 17.3078 |
| 2      | 17.907        | VB   | 0.5585      | 6198.08105   | 172.78435    | 82.6922 |

## UV-VIS spectra of the enantiomers

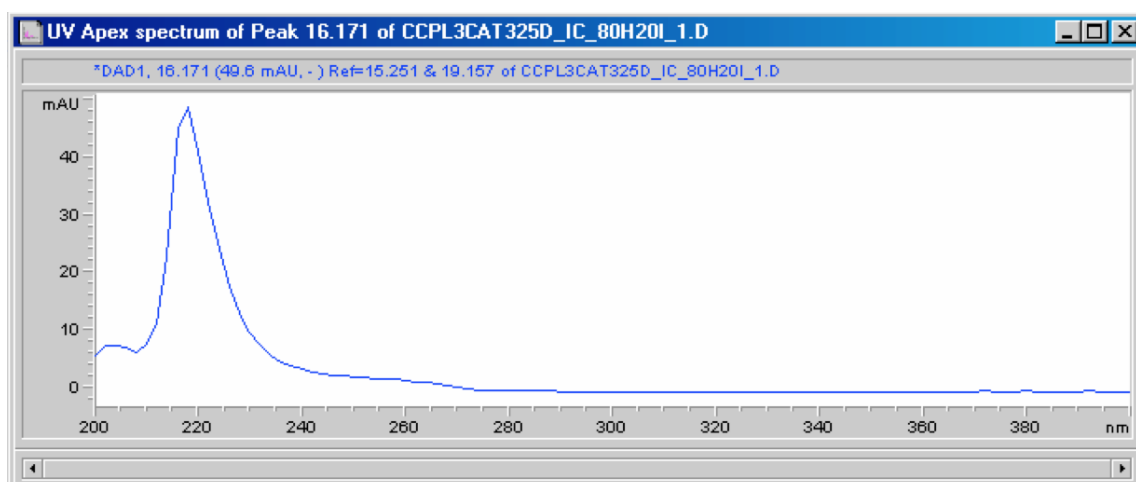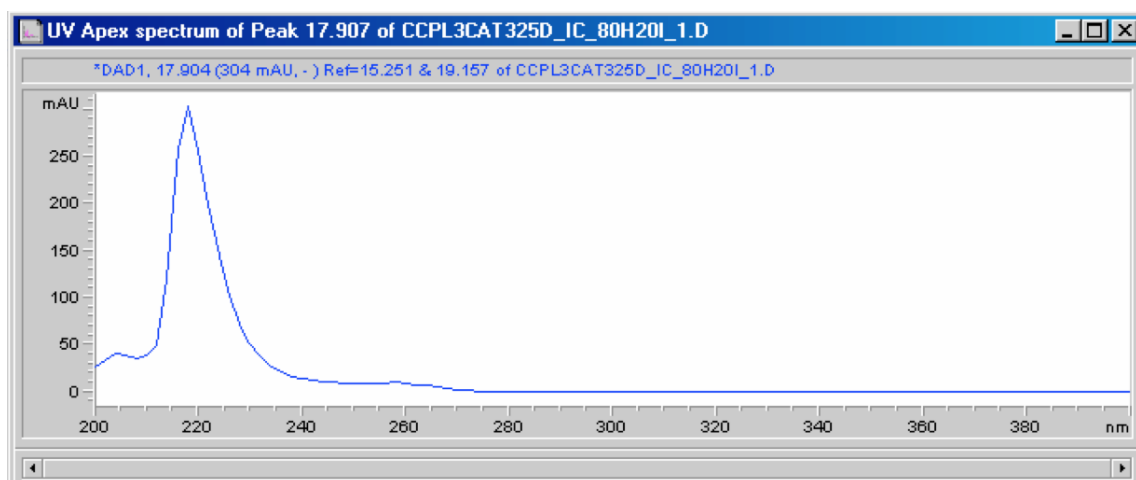

HPLC analysis: Chiralpack IC, *n*-Hex:*i*PrOH = 90/10, 25°C, flow rate = 1.5 mL/min,  $\lambda$  = 220 nm, *Z* isomer:  $t_R$ (epoxide 1) = 10.3 min,  $t_R$ (epoxide 2) = 12.0 min; *E* isomer:  $t_R$ (epoxide 1) = 24.5 min,  $t_R$ (epoxide 2) = 27.2 min

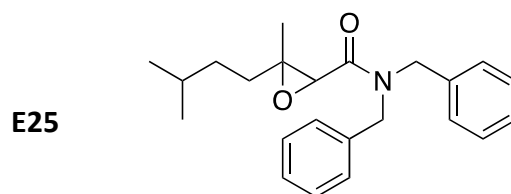

Racemic

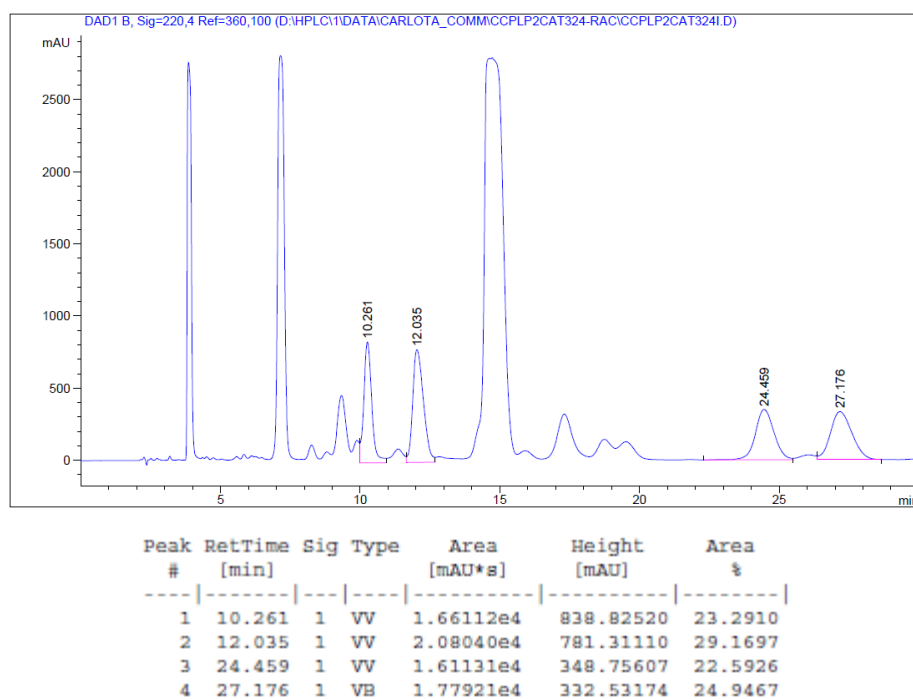

Table 3 entry 12

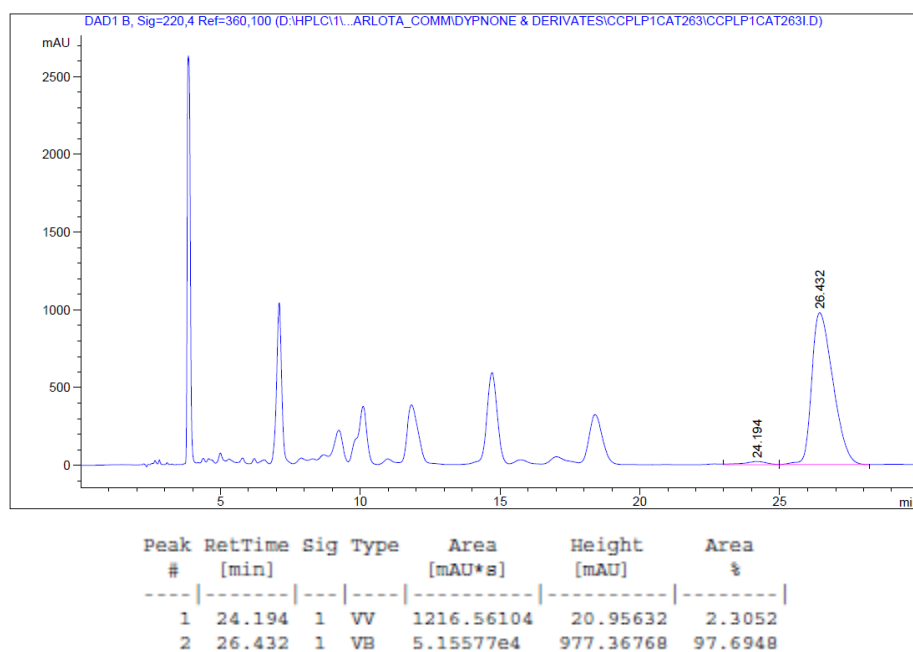

## UV-VIS spectra of the enantiomers

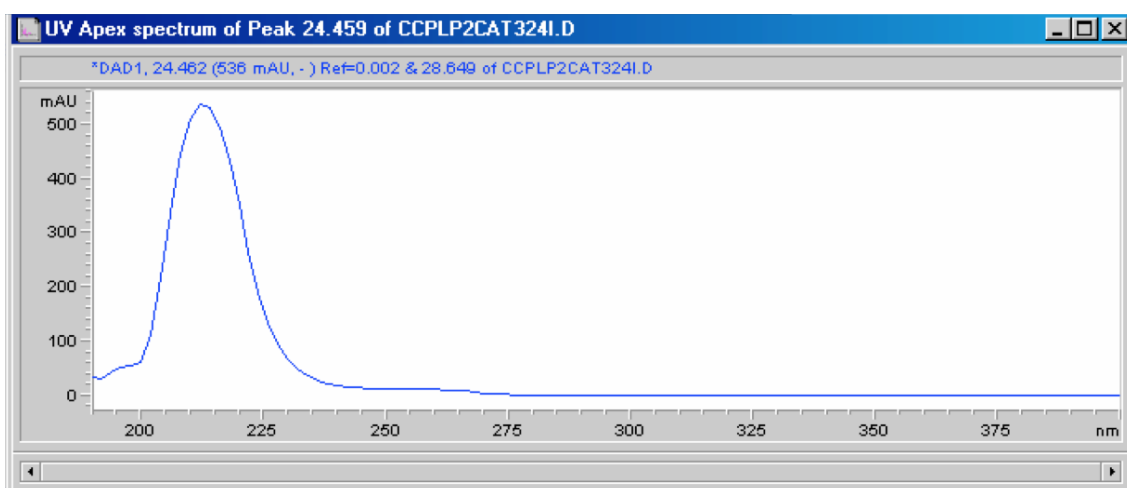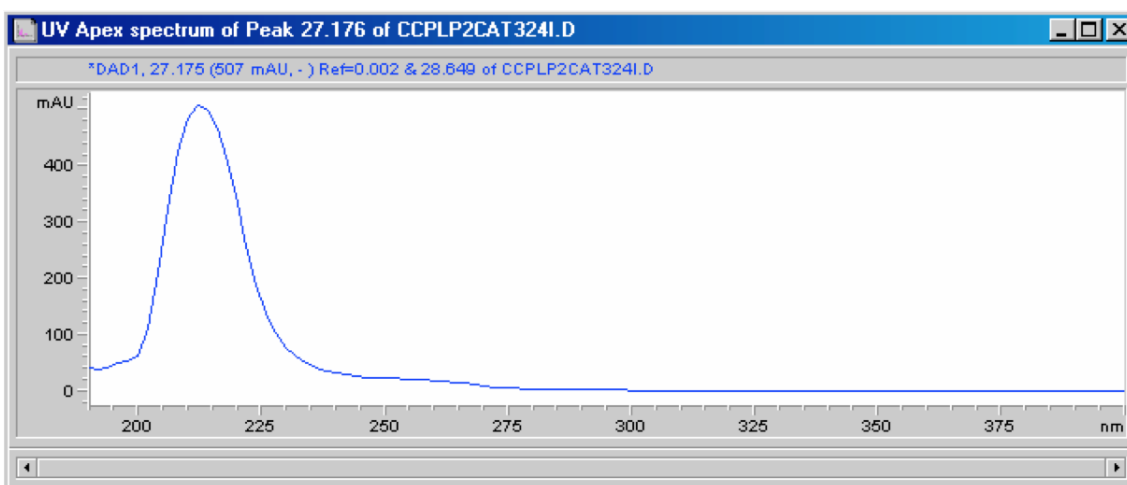

HPLC analysis: Chiralpack IA, *n*-Hex:*i*PrOH = 90/10, 25°C, flow rate = 0.5 mL/min,  $\lambda$  = 220 nm,  $t_R$ (epoxide 1) = 37.0 min,  $t_R$ (epoxide 2) = 56.8 min

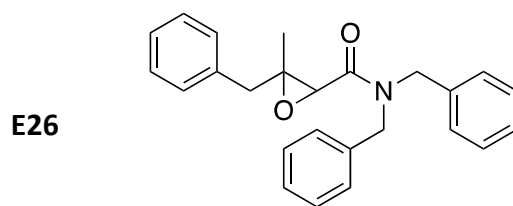

Racemic

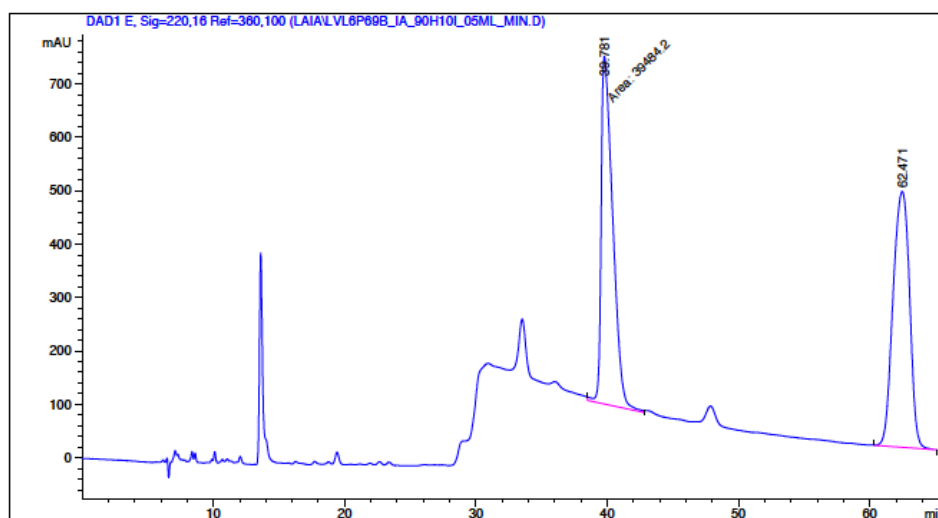

| Peak # | RetTime [min] | Type | Width [min] | Area [mAU*s] | Height [mAU] | Area %  |
|--------|---------------|------|-------------|--------------|--------------|---------|
| 1      | 39.781        | MM   | 1.0118      | 3.94842e4    | 650.40948    | 48.5529 |
| 2      | 62.471        | BB   | 1.4170      | 4.18379e4    | 478.99362    | 51.4471 |

Table 3 entry 13

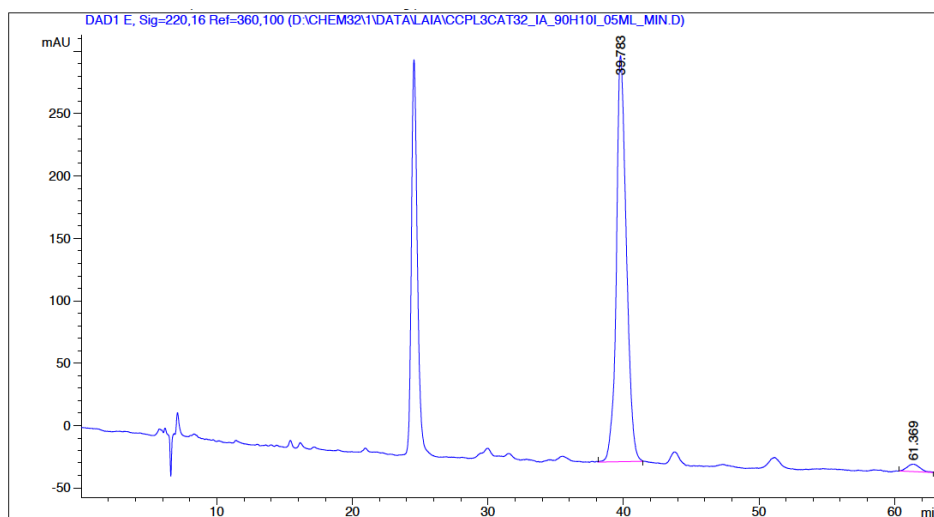

| Peak # | RetTime [min] | Type | Width [min] | Area [mAU*s] | Height [mAU] | Area %  |
|--------|---------------|------|-------------|--------------|--------------|---------|
| 1      | 39.783        | VB   | 0.7656      | 1.67232e4    | 325.37418    | 97.6622 |
| 2      | 61.369        | BB   | 0.7737      | 400.31412    | 6.13173      | 2.3378  |

## UV-VIS spectra of the enantiomers

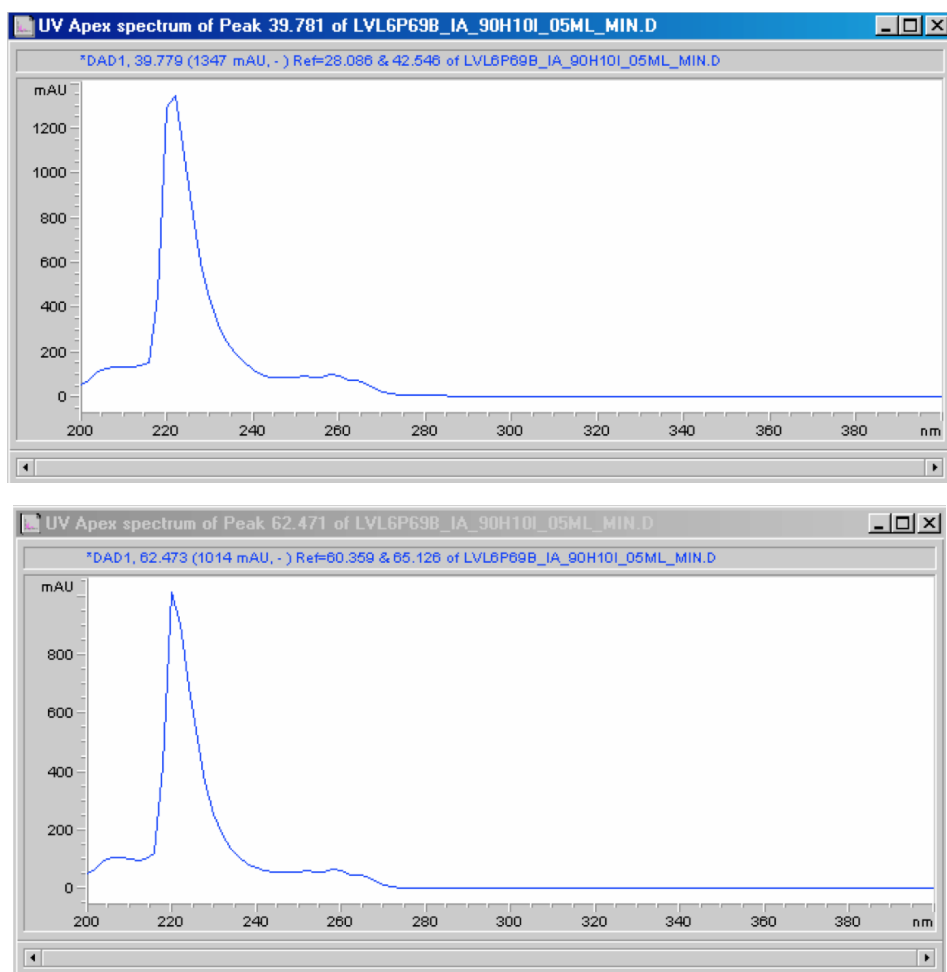

## 7) References

1. Fristrup, P.; Dideriksen, B. B.; Tanner, D.; Norrby, P.-O. *J. Am. Chem. Soc.* **2005**, *127*, 13672.
2. Garcia-Bosch, I.; Ribas, X.; Costas, M. *Adv. Synth. Catal.* **2009**, *351*, 348.
3. Nishikawa, Y.; Yamamoto, H. *J. Am. Chem. Soc.* **2011**, *133*, 8432.
4. Lu, S.-M.; Bolm, C. *Chem. Eur. J.* **2008**, *14*, 7513.
5. Metternich, J. B.; Gilmour, R. *J. Am. Chem. Soc.* **2015**, *137*, 11254.
6. Tsuchiya, Y.; Hamashima, Y.; Sodeoka, M. *Org. Lett.* **2006**, *8*, 4851.
7. Nishikawa, K.; Fukuda, H.; Abe, M.; Nakanishi, K.; Tazawa, Y.; Yamaguchi, C.; Hiradate, S.; Fujii, Y.; Okuda, K.; Shindo, M. *Phytochemistry* **2013**, *96*, 223.
8. Bush, A. G.; Jiang, J. L.; Payne, P. R.; Ogilvie, W. W. *Tetrahedron* **2009**, *65*, 8502.
9. Bernasconi, M.; Ramella, V.; Tosatti, P.; Pfaltz, A. *Chem. Eur. J.* **2014**, *20*, 2440.
10. Comito, R. J.; Finelli, F. G.; MacMillan, D. W. C. *J. Am. Chem. Soc.* **2013**, *135*, 9358.
11. Lempenauer, L.; Duñach, E.; Lemièrre, G. *Chem. Eur. J.* **2017**, *23*, 10285.
12. Hennum, M.; Odden, H. H.; Gundersen, L.-L. *Eur. J. Org. Chem* **2017**, *2017*, 846.
13. Yan, Q.; Kong, D.; Zhao, W.; Zi, G.; Hou, G. *J. Org. Chem.* **2016**, *81*, 2070.
14. Metternich, J. B.; Gilmour, R. *J. Am. Chem. Soc.* **2016**, *138*, 1040.
15. Liu, R.; Yang, Z.; Ni, Y.; Song, K.; Shen, K.; Lin, S.; Pan, Q. *J. Org. Chem.* **2017**, *82*, 8023.
16. Rudler, H.; Comte, V.; Garrier, E.; Bellassoued, M.; Chelain, E.; Vaissermann, J. J. *Organomet. Chem.* **2001**, *621*, 284.
17. Liu, L.; Du, L.; Zhang-Negrerie, D.; Du, Y.; Zhao, K. *Org. Lett.* **2014**, *16*, 5772.
18. Saito, Y.; Ouchi, H.; Takahata, H. *Tetrahedron* **2008**, *64*, 11129.
19. Kitanosono, T.; Xu, P.; Kobayashi, S. *Chem. Asian J.* **2014**, *9*, 179.
20. Chen, Y.; Turlik, A.; Newhouse, T. R. *J. Am. Chem. Soc.* **2016**, *138*, 1166.
21. Cussó, O.; Garcia-Bosch, I.; Font, D.; Ribas, X.; Lloret-Fillol, J.; Costas, M. *Org. Lett.* **2013**, *15*, 6158.
22. Cussó, O.; Garcia-Bosch, I.; Ribas, X.; Lloret-Fillol, J.; Costas, M. *J. Am. Chem. Soc.* **2013**, *135*, 14871.
23. Milan, M.; Bietti, M.; Costas, M. *ACS Centr. Sci.* **2017**, *3*, 196.
24. Font, D.; Canta, M.; Milan, M.; Cussó, O.; Ribas, X.; Klein Gebbink, R. J.; Costas, M. *Angew. Chem. Int. Ed.* **2016**, *55*, 5776.
25. Elliott, M. C.; Williams, E. *Org. Biomol. Chem.* **2003**, *1*, 3038.
26. Zhang, C. X.; Kaderli, S.; Costas, M.; Kim, E.-i.; Neuhold, Y.-M.; Karlin, K. D.; Zuberbuehler, A. D. *Inorg. Chem.* **2003**, *42*, 1807.
